# Supplementary material for: A general synthesis of aromatic amides via palladium-catalyzed direct aminocarbonylation of aryl chlorides
Source: Royal Society of Chemistry journal article supplement (doi:10.1039/d2qo00251e), 2022-01-01
Supplement: d2qo00251e1.pdf [file d2qo00251e1.pdf]

## Supplementary material

### **A General Synthesis of Aromatic Amides via Palladium-Catalyzed direct Aminocarbonylation of Aryl Chlorides**

Peng Wang, Ji Yang, Kangkang Sun, Helfried Neumann,\* Matthias Beller\*

<sup>a</sup> Leibniz-Institut für Katalyse e. V. Albert-Einstein-Strasse 29a, 18059 Rostock (Germany) Fax:

(+49) 381-1281-5000

\* Corresponding author e-mail: helfried.neumann@catalysis.de and matthias.beller@catalysis.de.

#### **Table of contents**

1. Supplement to the experiments
2. NMR data for the main products

#### **1. Supplement to the experiments**

##### **1.1 General considerations**

The chemical reagents were purchased from Merck Chemicals, ABCR Chemicals or TCI Chemicals, which were used as received. The <sup>1</sup>H NMR and <sup>13</sup>C NMR spectra were recorded on a Bruker 300 spectrometer. Conversion and selectivity were determined by Agilent 6890N GC and Agilent 5973 Network GC-MS.

##### **1.2 Supplement to Aminocarbonylation of Aryl Chlorides**

All the palladium precursors and solvents in this part are commercially available.

**Table S1** Aminocarbonylation of 4-chlorobenzonitrile under different palladium precursors and solvents <sup>a</sup>

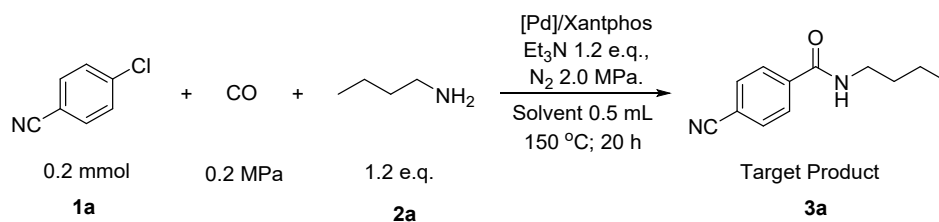

| Entry    | Pd catalyst                                         | P-Ligand        | Base                   | Solvent            | Conv. (%) <sup>b</sup> | Sel. <sub>3a</sub> (%) <sup>b</sup> |
|----------|-----------------------------------------------------|-----------------|------------------------|--------------------|------------------------|-------------------------------------|
| <b>1</b> | <b>Pd(OAc)<sub>2</sub></b>                          | <b>Xantphos</b> | <b>Et<sub>3</sub>N</b> | <b>1,4-dioxane</b> | <b>98</b>              | <b>97</b>                           |
| 2        | Pd(CH <sub>3</sub> CN) <sub>2</sub> Cl <sub>2</sub> | Xantphos        | Et <sub>3</sub> N      | 1,4-dioxane        | 90                     | 90                                  |
| 3        | Pd(PPh <sub>3</sub> ) <sub>2</sub> Cl <sub>2</sub>  | Xantphos        | Et <sub>3</sub> N      | 1,4-dioxane        | 89                     | 88                                  |
| 4        | Pd(PPh <sub>3</sub> ) <sub>4</sub>                  | Xantphos        | Et <sub>3</sub> N      | 1,4-dioxane        | 85                     | 91                                  |
| 5        | Pd/C (10 %)                                         | Xantphos        | Et <sub>3</sub> N      | 1,4-dioxane        | 56                     | 94                                  |
| 6        | Pd(cod)Cl <sub>2</sub>                              | Xantphos        | Et <sub>3</sub> N      | 1,4-dioxane        | 84                     | 89                                  |
| 7        | Pd(PhCN) <sub>2</sub> Cl <sub>2</sub>               | Xantphos        | Et <sub>3</sub> N      | 1,4-dioxane        | 80                     | 96                                  |
| 8        | [Pd(allyl)Cl] <sub>2</sub>                          | Xantphos        | Et <sub>3</sub> N      | 1,4-dioxane        | 85                     | 86                                  |
| 9        | Pd(OAc) <sub>2</sub>                                | Xantphos        | Et <sub>3</sub> N      | THF                | 83                     | 80                                  |
| 10       | Pd(OAc) <sub>2</sub>                                | Xantphos        | Et <sub>3</sub> N      | DMSO               | 72                     | 84                                  |
| 11       | Pd(OAc) <sub>2</sub>                                | Xantphos        | Et <sub>3</sub> N      | Toluene            | 92                     | 90                                  |
| 12       | Pd(OAc) <sub>2</sub>                                | Xantphos        | Et <sub>3</sub> N      | MeCN               | 85                     | 96                                  |
| 13       | Pd(OAc) <sub>2</sub>                                | Xantphos        | Et <sub>3</sub> N      | DMF                | 93                     | 5                                   |
| 14       | Pd(OAc) <sub>2</sub>                                | Xantphos        | Et <sub>3</sub> N      | DMAc               | 95                     | 38                                  |

<sup>a</sup> 4-Chlorobenzonitrile (0.2 mmol, 27.5 mg), *n*-butylamine 0.24 mmol (17.52 mg, 1.2 e.q.), Pd precursor 0.004 mmol, S/[Pd] mol ratio = 50, 0.016 mmol Xantphos, Et<sub>3</sub>N 0.24 mmol (1.2 e.q.), CO 0.2 MPa, N<sub>2</sub> 2.0 MPa, 150 °C, solvent 0.5 mL, time 20 h; <sup>b</sup> Determined by GC-MS, dodecane (C<sub>12</sub>) as internal standard.

**Table S2** Aminocarbonylation of chlorobenzene under different ligands, solvents and temperature <sup>a</sup>

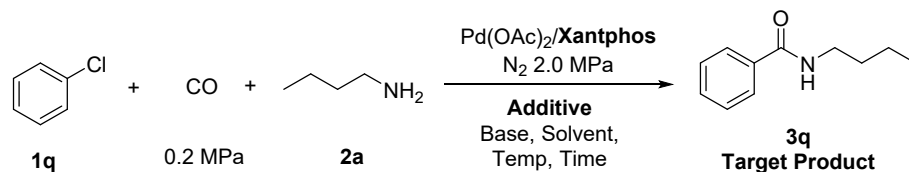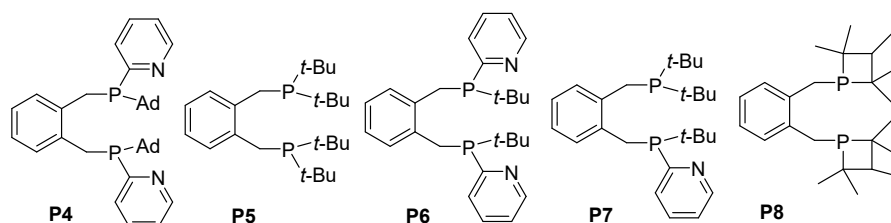

| Entry          | P-Ligand               | Additive    | Base                   | Temp<br>(°C) | Solvent            | Conv.<br>(%) <sup>b</sup> | Sel. <b>3q</b><br>(%) <sup>b</sup> |
|----------------|------------------------|-------------|------------------------|--------------|--------------------|---------------------------|------------------------------------|
| <b>1</b>       | <b>Xantphos</b>        | <b>CsCl</b> | <b>Et<sub>3</sub>N</b> | <b>150</b>   | <b>1,4-dioxane</b> | <b>45</b>                 | <b>94</b>                          |
| 2              | <b>PPh<sub>3</sub></b> | CsCl        | Et <sub>3</sub> N      | 150          | 1,4-dioxane        | 21                        | 8                                  |
| 3              | <b>P4</b>              | CsCl        | Et <sub>3</sub> N      | 150          | 1,4-dioxane        | 1                         | Trace                              |
| 4              | <b>P5</b>              | CsCl        | Et <sub>3</sub> N      | 150          | 1,4-dioxane        | 20                        | 34                                 |
| 5              | <b>P6</b>              | CsCl        | Et <sub>3</sub> N      | 150          | 1,4-dioxane        | 18                        | 38                                 |
| 6              | <b>P7</b>              | CsCl        | Et <sub>3</sub> N      | 150          | 1,4-dioxane        | 23                        | 36                                 |
| 7              | <b>P8</b>              | CsCl        | Et <sub>3</sub> N      | 150          | 1,4-dioxane        | 14                        | 27                                 |
| 8 <sup>c</sup> | <b>Xantphos</b>        | CsCl        | Et <sub>3</sub> N      | 150          | 1,4-dioxane        | 21                        | 94                                 |
| 9 <sup>d</sup> | <b>Xantphos</b>        | CsCl        | Et <sub>3</sub> N      | 150          | 1,4-dioxane        | 6                         | 96                                 |
| 10             | <b>Xantphos</b>        | CsCl        | Et <sub>3</sub> N      | 150          | THF                | 43                        | 86                                 |
| 11             | <b>Xantphos</b>        | CsCl        | Et <sub>3</sub> N      | 150          | DMSO               | 35                        | 56                                 |
| 12             | <b>Xantphos</b>        | CsCl        | Et <sub>3</sub> N      | 150          | Toluene            | 23                        | 96                                 |
| 13             | <b>Xantphos</b>        | CsCl        | Et <sub>3</sub> N      | 150          | MeCN               | 23                        | 5                                  |
| 14             | <b>Xantphos</b>        | CsCl        | Et <sub>3</sub> N      | 150          | DMF                | 53                        | 13                                 |
| 15             | <b>Xantphos</b>        | CsCl        | Et <sub>3</sub> N      | 150          | DMAc               | 39                        | 8                                  |
| 16             | <b>Xantphos</b>        | CsCl        | Et <sub>3</sub> N      | 140          | 1,4-dioxane        | 32                        | 68                                 |
| 17             | <b>Xantphos</b>        | CsCl        | Et <sub>3</sub> N      | 100          | 1,4-dioxane        | 7                         | 27                                 |

<sup>a</sup> Chlorobenzene (0.2 mmol), butylamine 0.24 mmol (1.2 e.q.), Pd(OAc)<sub>2</sub> 0.004 mmol, [Pd]/[P] mol ratio = 1/8, base 0.24 mmol, additive 0.2 mmol, CO 0.2 MPa, N<sub>2</sub> 2.0 MPa, 150 °C, solvent 0.5 ml, time 20 h; <sup>b</sup> Determined by GC and GC-MS, dodecane (C<sub>12</sub>) as internal standard; <sup>c</sup> [Pd] 1 % mol, S/[Pd] mol ratio = 100, Xantphos 4 % mol; <sup>d</sup> [Pd] 0.5 % mol, S/[Pd] mol ratio = 200, Xantphos 2 % mol.

## 2. NMR data of the main products

All the products separated are known products. Methods for the separation of all compounds are according to the references [1-5].

### N-butyl-4-cyanobenzamide (3a)

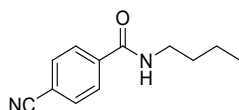

$^1\text{H}$  NMR (400 MHz, Chloroform-*d*)  $\delta$  7.79 (d,  $J = 8.1$  Hz, 2H), 7.66 (d,  $J = 8.0$  Hz, 2H), 6.18 (s, 1H), 3.45-3.35 (m, 2H), 1.54 (s, 2H), 1.35 (d,  $J = 7.7$  Hz, 2H), 0.89 (t,  $J = 7.3$  Hz, 3H).

$^{13}\text{C}$  NMR (101 MHz, Chloroform-*d*)  $\delta$  165.74, 138.78, 132.46, 127.61, 118.05, 114.95, 40.10, 31.60, 20.15, 13.76.

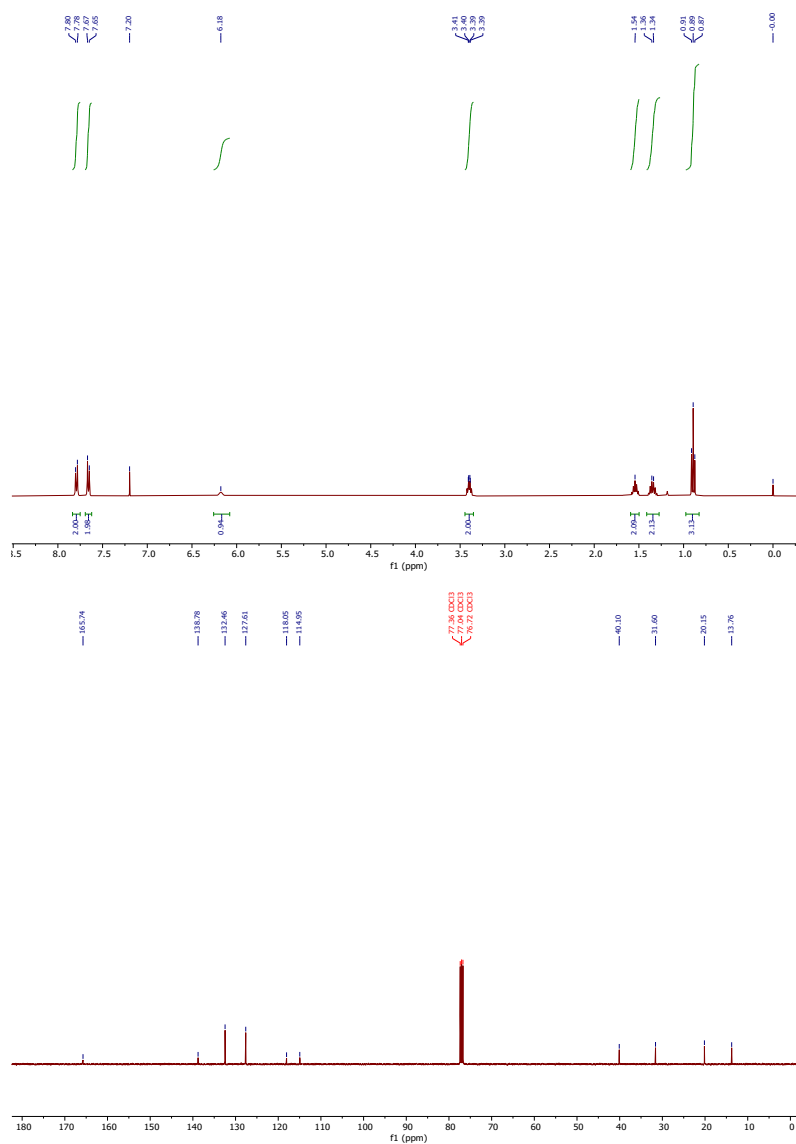



N-butyl-3-(trifluoromethyl)benzamide (3c)

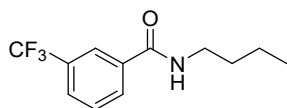

$^1\text{H}$  NMR (300 MHz, Chloroform-*d*)  $\delta$  7.97-7.84 (m, 2H), 7.65 (dddd,  $J = 7.8, 1.9, 1.2, 0.7$  Hz, 1H), 7.46 (tp,  $J = 7.8, 0.8$  Hz, 1H), 6.45 (s, 1H), 3.38 (td,  $J = 7.2, 5.7$  Hz, 2H), 1.60-1.46 (m, 2H), 1.40-1.26 (m, 2H), 0.87 (t,  $J = 7.3$  Hz, 3H).

$^{13}\text{C}$  NMR (75 MHz, Chloroform-*d*)  $\delta$  166.21, 135.65, 131.67, 131.24, 130.80, 130.36, 130.25, 130.23, 130.21, 130.19, 129.13, 127.95, 127.90, 127.86, 127.81, 125.53, 123.97, 123.92, 123.87, 123.82, 121.92, 40.03, 31.63, 20.14, 13.73.

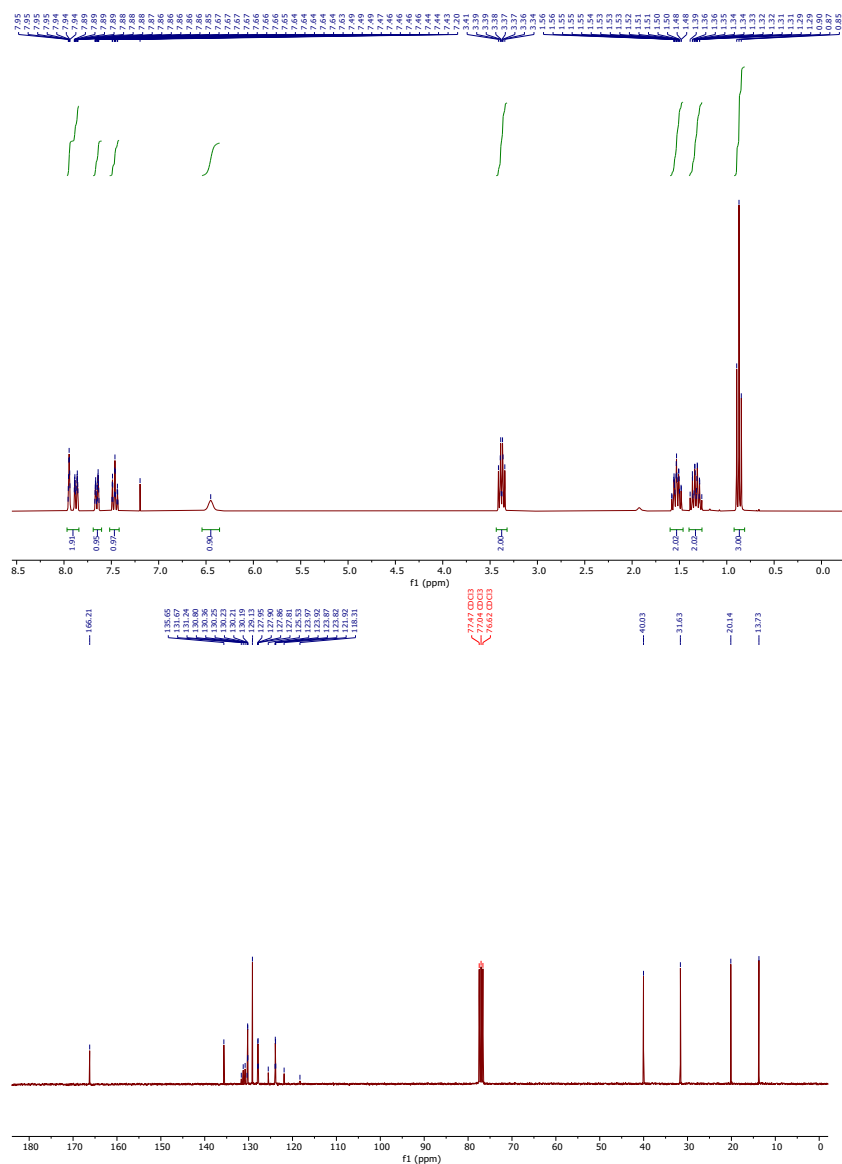

N-butyl-4-(trifluoromethyl)benzamide (**3d**)

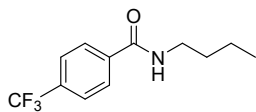

$^1\text{H}$  NMR (400 MHz, Chloroform-*d*)  $\delta$  7.83-7.76 (m, 2H), 7.66-7.58 (m, 2H), 6.08 (s, 1H), 3.46-3.35 (m, 2H), 1.61-1.53 (m, 2H), 1.36 (dq,  $J = 14.4, 7.3$  Hz, 2H), 0.90 (t,  $J = 7.3$  Hz, 3H).

$^{13}\text{C}$  NMR (101 MHz, Chloroform-*d*)  $\delta$  166.24, 138.15, 133.27, 132.94, 127.32, 125.69, 125.65, 125.61, 125.57, 125.04, 122.33, 40.01, 31.66, 20.15, 13.77.

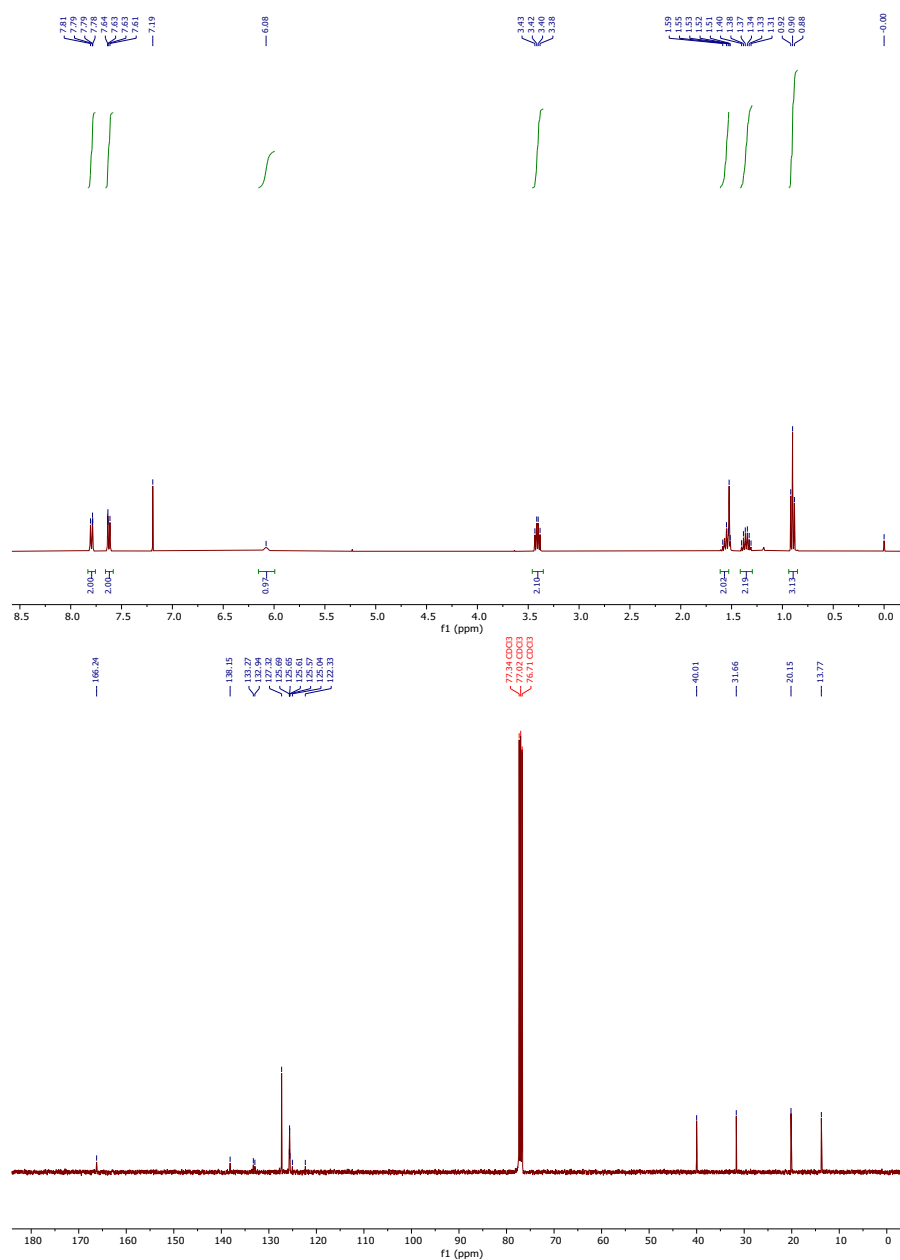

N-butyl-4-fluorobenzamide (**3e**)

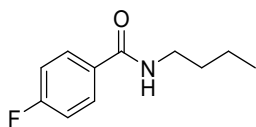

$^1\text{H}$  NMR (300 MHz, Chloroform-*d*)  $\delta$  7.79-7.61 (m, 2H), 7.03 (dd,  $J = 8.9, 8.4$  Hz, 2H), 5.99 (s, 1H), 3.38 (td,  $J = 7.2, 5.7$  Hz, 2H), 1.59-1.48 (m, 2H), 1.42-1.28 (m, 2H), 0.89 (t,  $J = 7.3$  Hz, 3H).

$^{13}\text{C}$  NMR (75 MHz, Chloroform-*d*)  $\delta$  166.47, 129.17, 129.06, 115.71, 115.42, 39.89, 31.74, 20.16, 13.79.

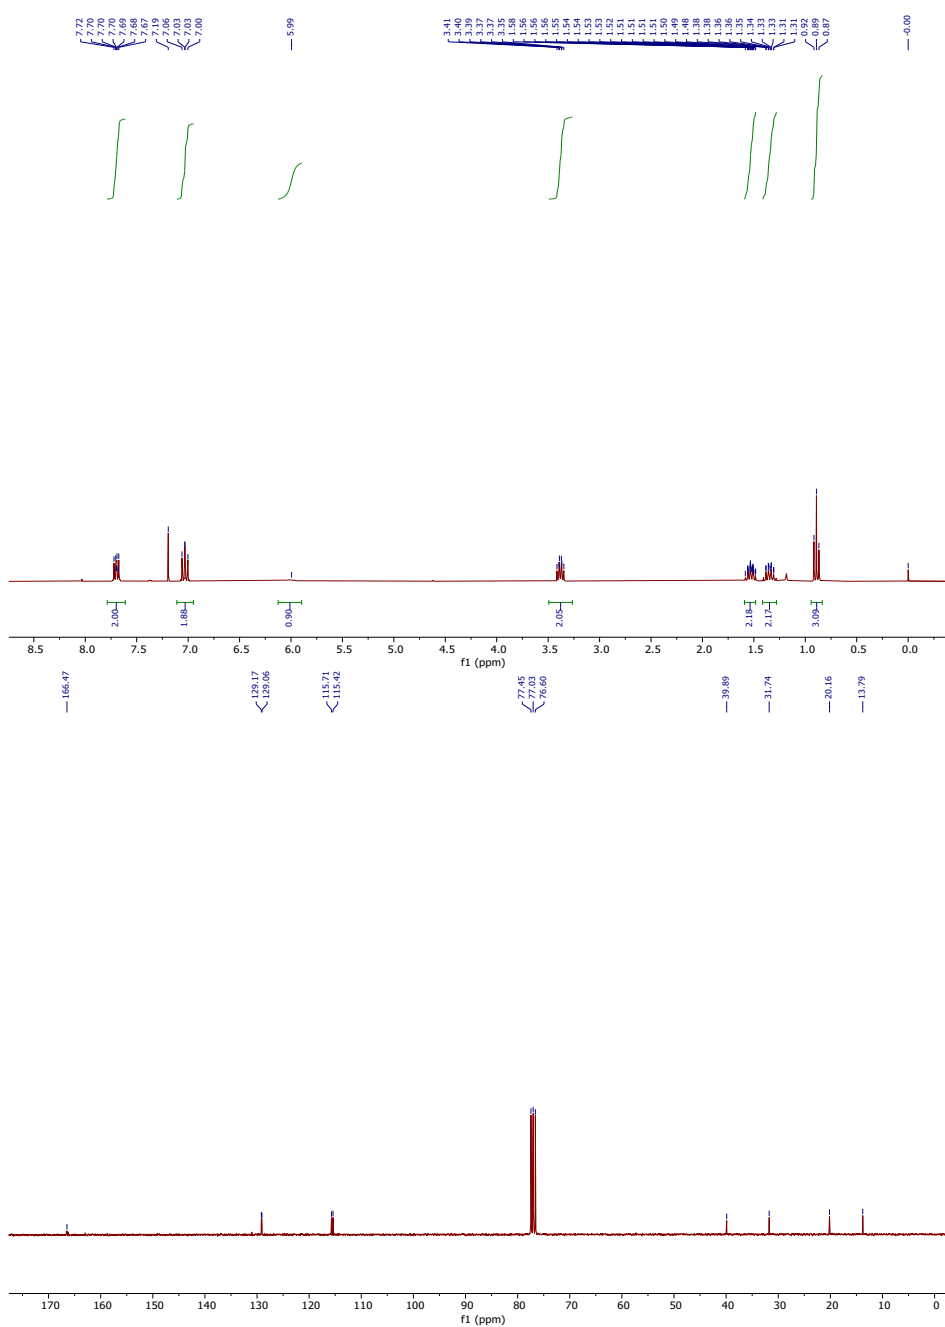

N-butyl-4-nitrobenzamide (**3f**)



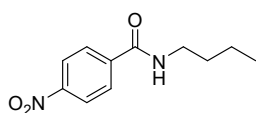

$^1\text{H}$  NMR (300 MHz, Chloroform-*d*)  $\delta$  7.55-7.47 (m, 2H), 6.65-6.55 (m, 2H), 5.93 (s, 1H), 3.40-3.32 (m, 2H), 1.56-1.46 (m, 2H), 1.37-1.31 (m, 2H), 0.89 (d,  $J = 7.3$  Hz, 3H).

$^{13}\text{C}$  NMR (75 MHz, Chloroform-*d*)  $\delta$  167.48, 149.38, 128.55, 117.82, 114.21, 39.67, 31.88, 20.19, 13.82.

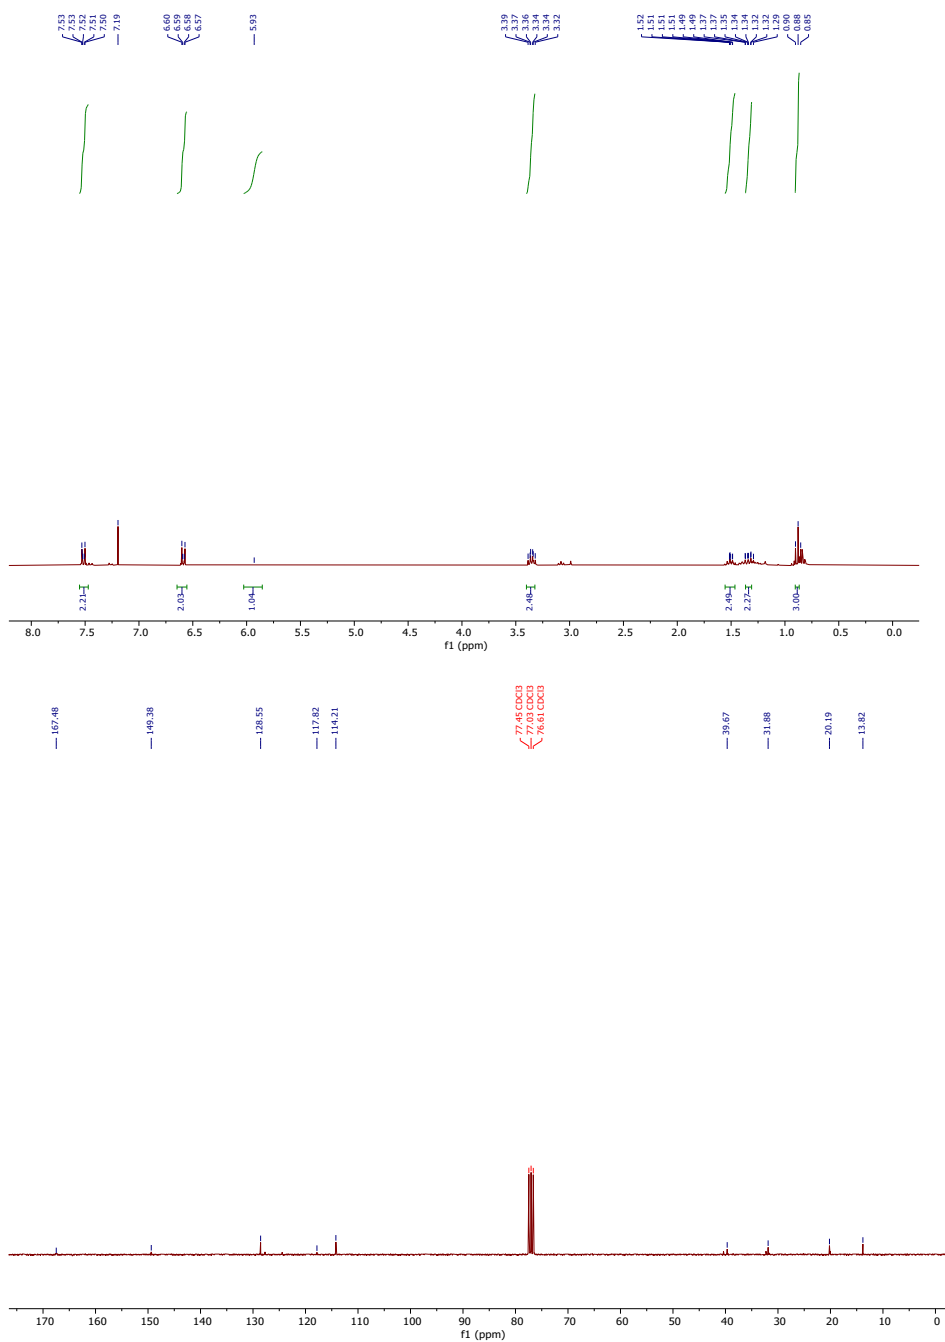

4-benzoyl-N-butylbenzamide (**3g**)

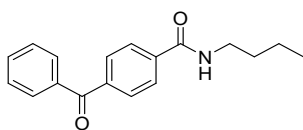

$^1\text{H}$  NMR (300 MHz, Chloroform-*d*)  $\delta$  7.84-7.67 (m, 6H), 7.57-7.48 (m, 1H), 7.44-7.36 (m, 2H), 6.45 (t,  $J = 5.7$  Hz, 1H), 3.40 (td,  $J = 7.2, 5.7$  Hz, 2H), 1.61-1.47 (m, 2H), 1.42-1.28 (m, 2H), 0.88 (t,  $J = 7.3$  Hz, 3H).

$^{13}\text{C}$  NMR (75 MHz, Chloroform-*d*)  $\delta$  196.08, 166.72, 139.86, 138.19, 137.04, 132.90, 130.10, 130.07, 128.45, 126.91, 40.02, 31.67, 20.18, 13.80.

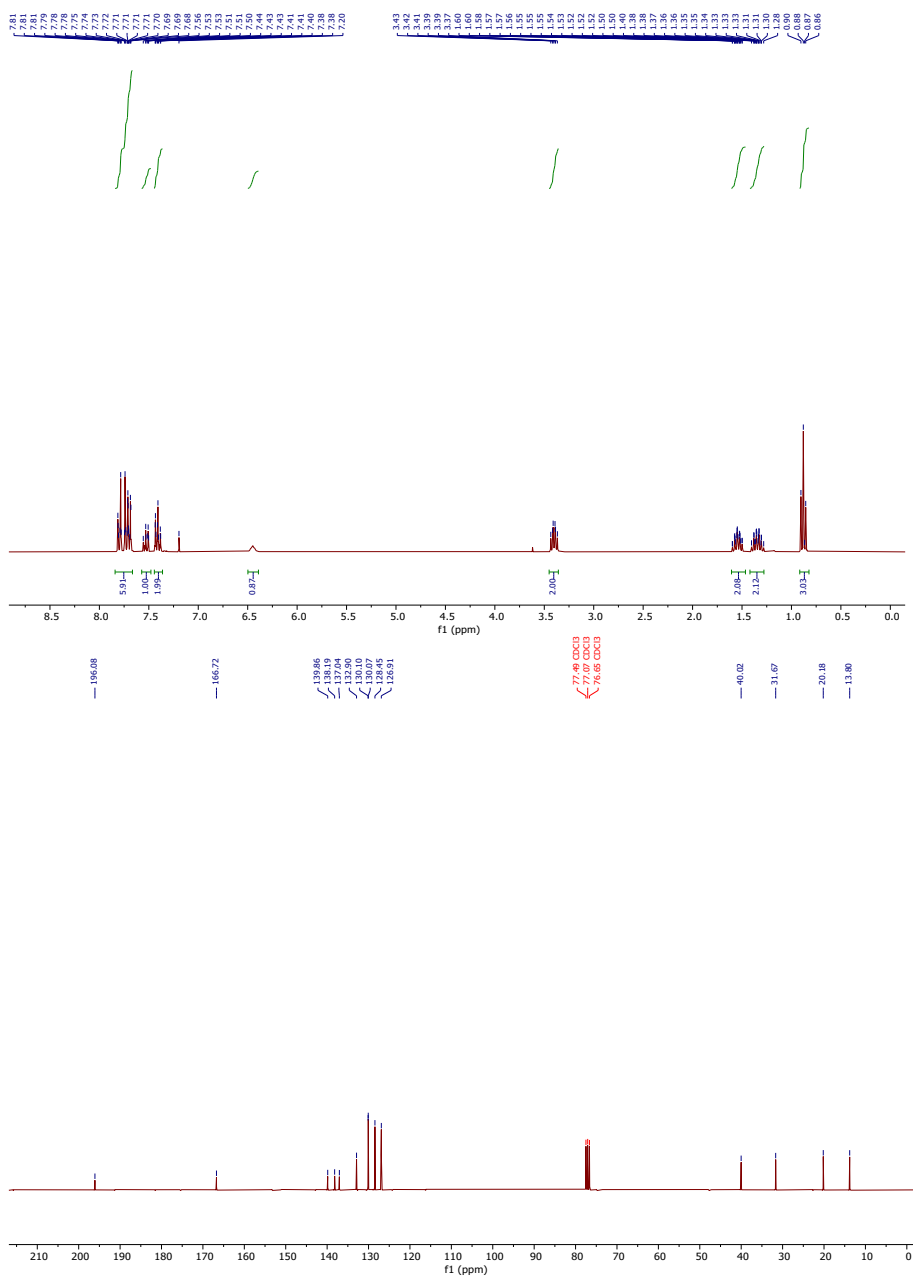

4-acetyl-N-butylbenzamide (**3h**)

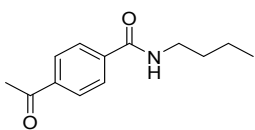

$^1\text{H}$  NMR (400 MHz, Chloroform-*d*)  $\delta$  7.98-7.89 (m, 2H), 7.82-7.72 (m, 2H), 6.11 (s, 1H), 3.45-3.35 (m, 2H), 2.57 (s, 3H), 1.54 (d,  $J = 6.9$  Hz, 2H), 1.36 (d,  $J = 8.2$  Hz, 2H), 0.90 (t,  $J = 7.3$  Hz, 3H).

$^{13}\text{C}$  NMR (101 MHz, Chloroform-*d*)  $\delta$  197.47, 166.53, 139.08, 138.76, 128.54, 127.17, 39.99, 31.68, 26.83, 20.17, 13.79.

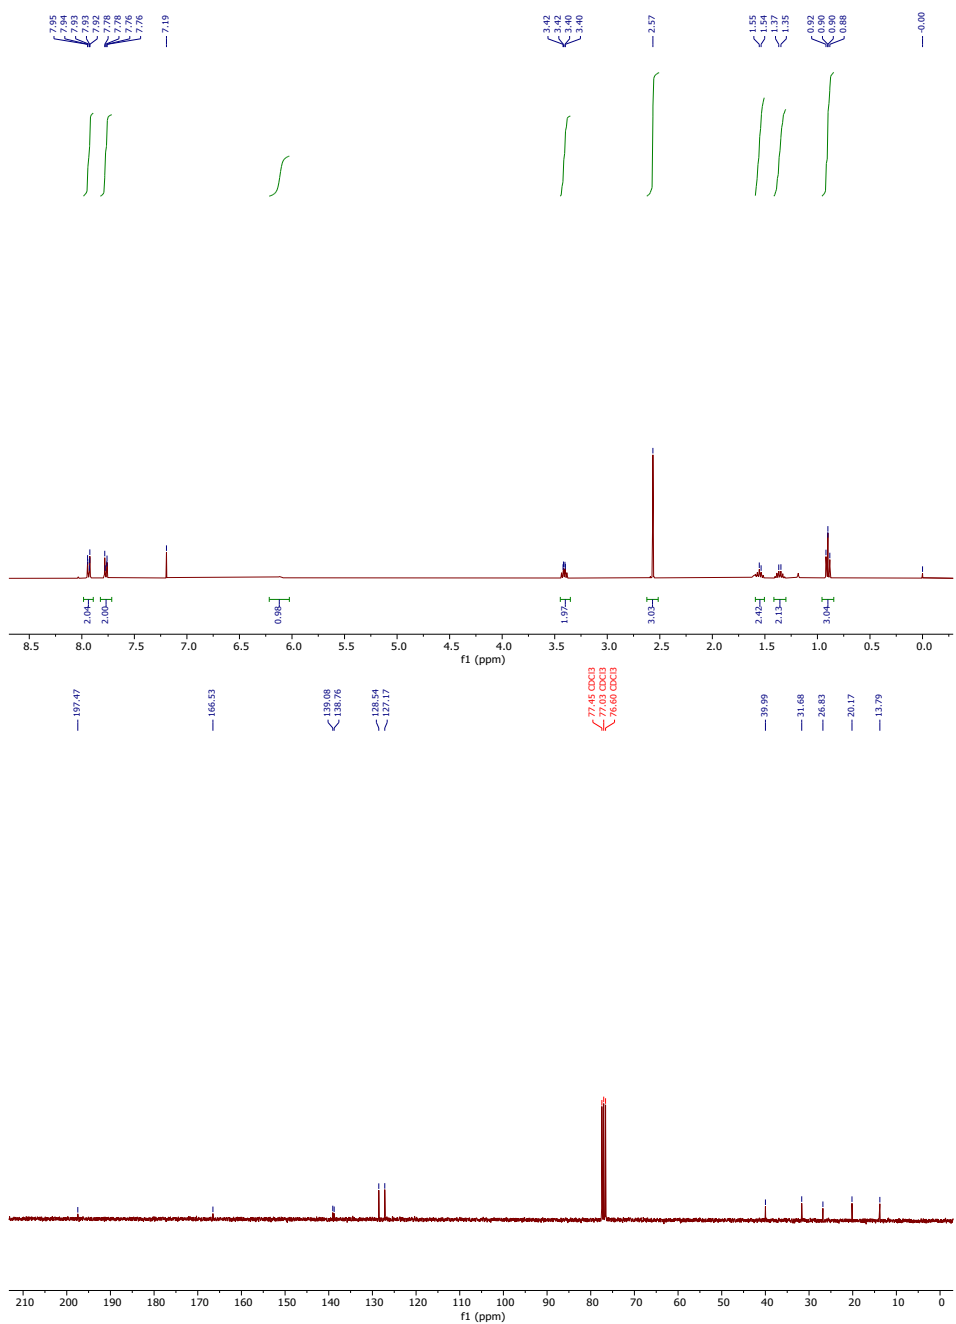

N-butylpicolinamide (**3i**)

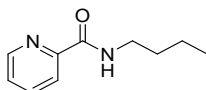

$^1\text{H}$  NMR (400 MHz, Chloroform-*d*)  $\delta$  8.54-8.39 (m, 1H), 8.13 (dt,  $J = 7.8, 1.1$  Hz, 1H), 7.98 (s, 1H), 7.77 (d,  $J = 1.7$  Hz, 1H), 7.38-7.32 (m, 1H), 3.41 (td,  $J = 7.1, 6.1$  Hz, 2H), 1.58-1.53 (m, 2H), 1.41-1.31 (m, 2H), 0.89 (t,  $J = 7.3$  Hz, 3H).

$^{13}\text{C}$  NMR (101 MHz, Chloroform-*d*)  $\delta$  164.23, 148.00, 137.34, 126.02, 122.20, 39.16, 31.74, 20.18, 13.79.

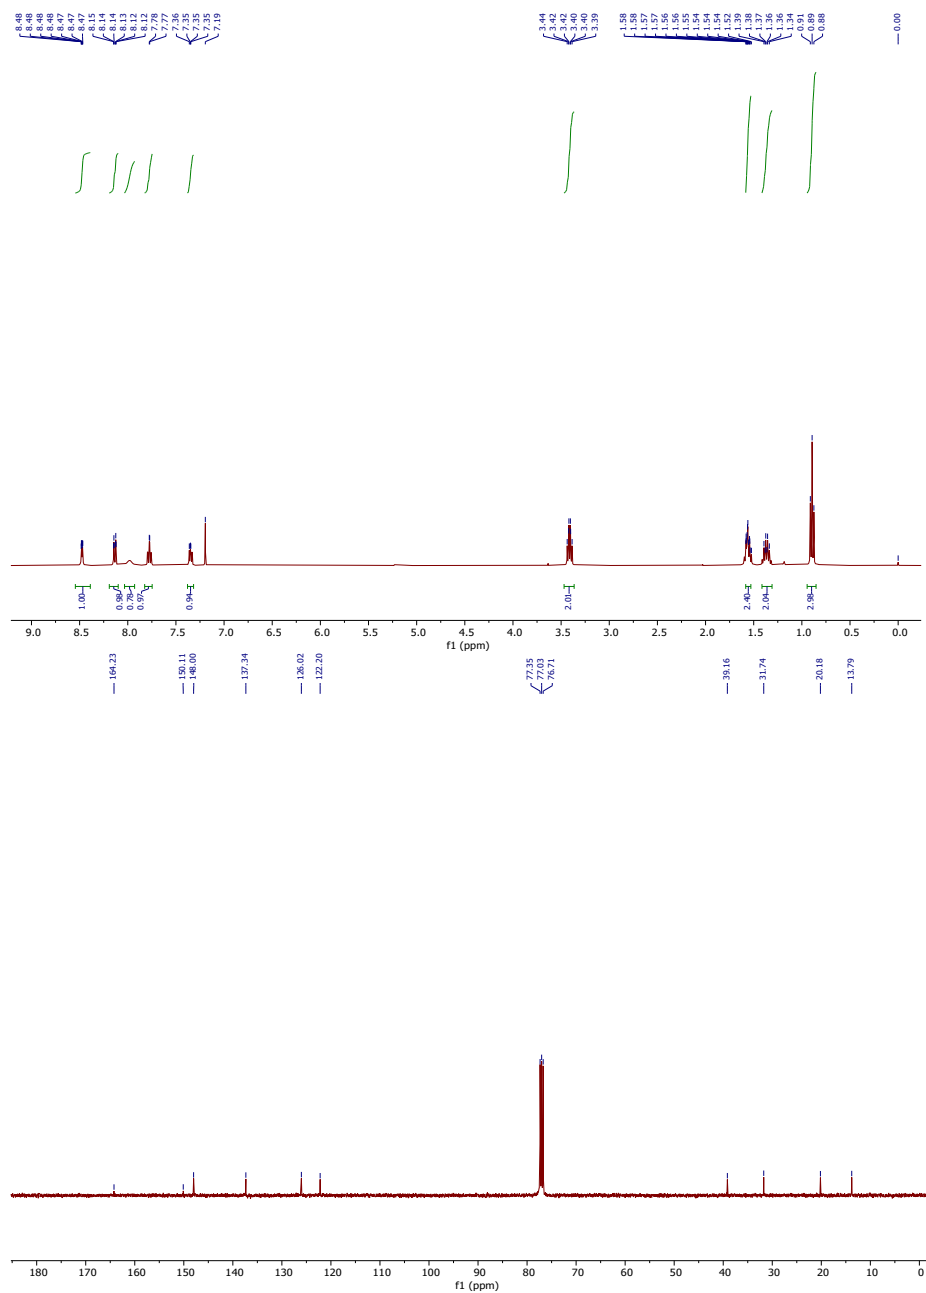

N-butylnicotinamide (**3j**)

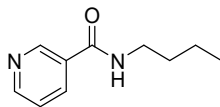

$^1\text{H}$  NMR (400 MHz, Chloroform-*d*)  $\delta$  8.89 (dd,  $J = 2.3, 0.9$  Hz, 1H), 8.63 (dd,  $J = 4.9, 1.7$  Hz, 1H), 8.05 (ddd,  $J = 7.9, 2.3, 1.7$  Hz, 1H), 7.31 (ddd,  $J = 7.9, 4.8, 0.9$  Hz, 1H), 6.34 (s, 1H), 3.40 (td,  $J = 7.2, 5.7$  Hz, 2H), 1.62-1.47 (m, 2H), 1.35 (dt,  $J = 8.5, 7.2$  Hz, 2H), 0.89 (t,  $J = 7.3$  Hz, 3H).

$^{13}\text{C}$  NMR (101 MHz, Chloroform-*d*)  $\delta$  165.62, 152.05, 147.72, 135.19, 130.56, 123.54, 39.95, 31.64, 20.14, 13.76.

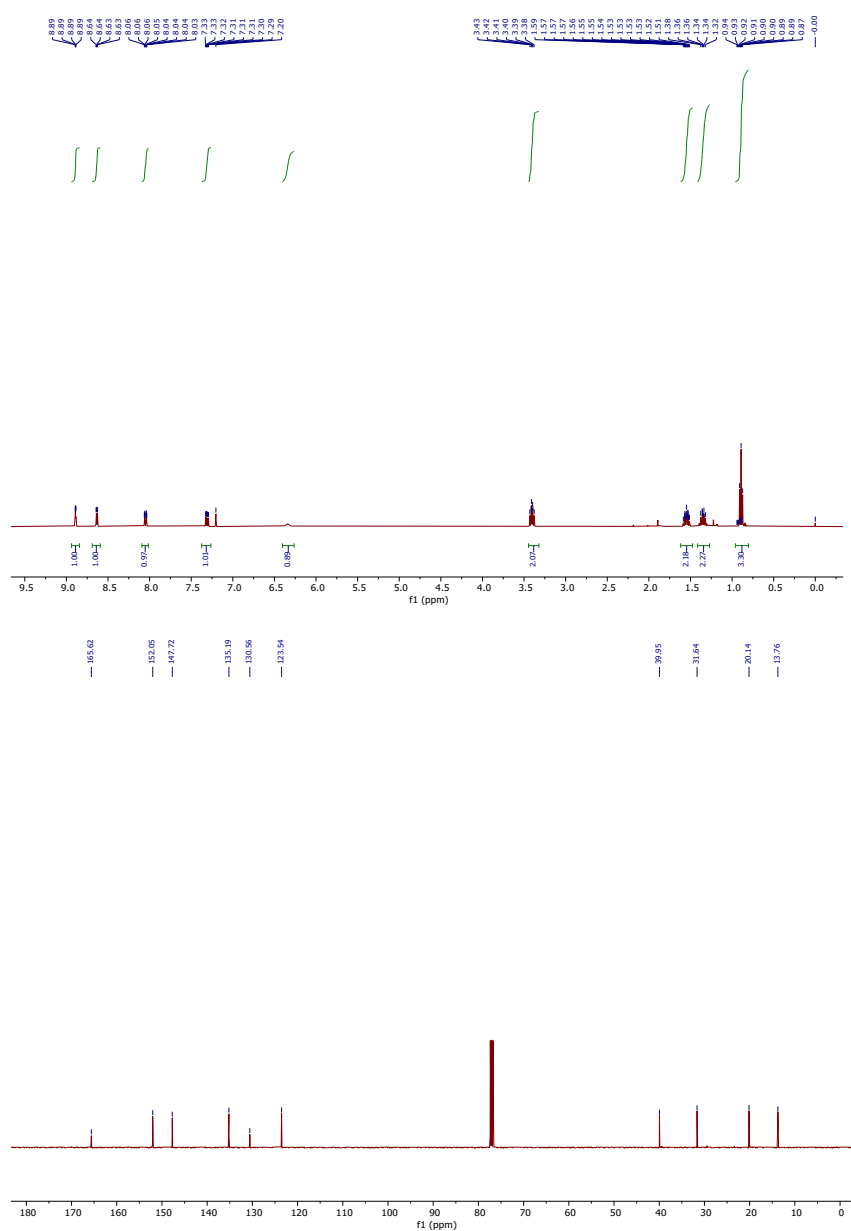

N-butylisonicotinamide (**3k**)

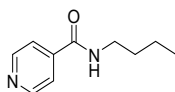

$^1\text{H}$  NMR (300 MHz, Chloroform-*d*)  $\delta$  8.70-8.59 (m, 2H), 7.62-7.48 (m, 2H), 6.62 (s, 1H), 3.38 (td,  $J$  = 7.2, 5.7 Hz, 2H), 1.59-1.46 (m, 2H), 1.40-1.23 (m, 2H), 0.87 (t,  $J$  = 7.3 Hz, 3H).

$^{13}\text{C}$  NMR (75 MHz, Chloroform-*d*)  $\delta$  165.59, 150.36, 142.05, 120.99, 40.00, 31.53, 20.12, 13.73.

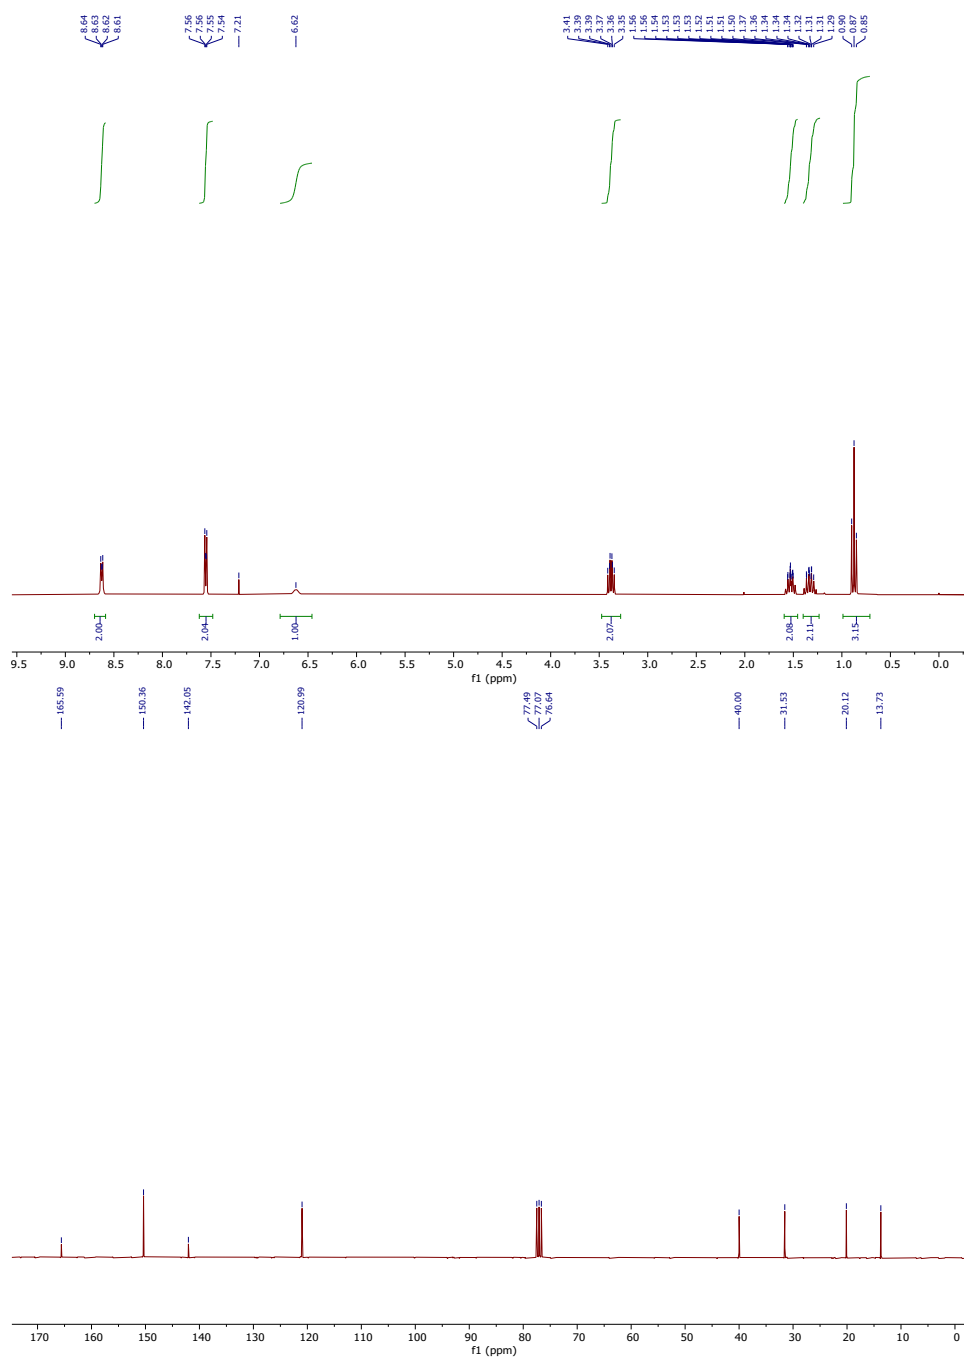

N-butylquinoline-2-carboxamide (**31**)



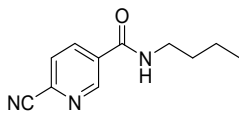

$^1\text{H}$  NMR (300 MHz, Chloroform-*d*)  $\delta$  9.05 (dd,  $J = 2.2, 0.9$  Hz, 1H), 8.27 (dd,  $J = 8.0, 2.2$  Hz, 1H), 7.81 (dd,  $J = 8.0, 0.9$  Hz, 1H), 6.32 (s, 1H), 3.51 (td,  $J = 7.2, 5.7$  Hz, 2H), 1.69-1.61 (m, 2H), 1.50-1.40 (m, 2H), 0.99 (t,  $J = 7.3$  Hz, 3H).

$^{13}\text{C}$  NMR (75 MHz, Chloroform-*d*)  $\delta$  163.82, 148.96, 136.21, 135.76, 133.06, 128.30, 116.63, 40.24, 31.51, 20.13, 13.73.

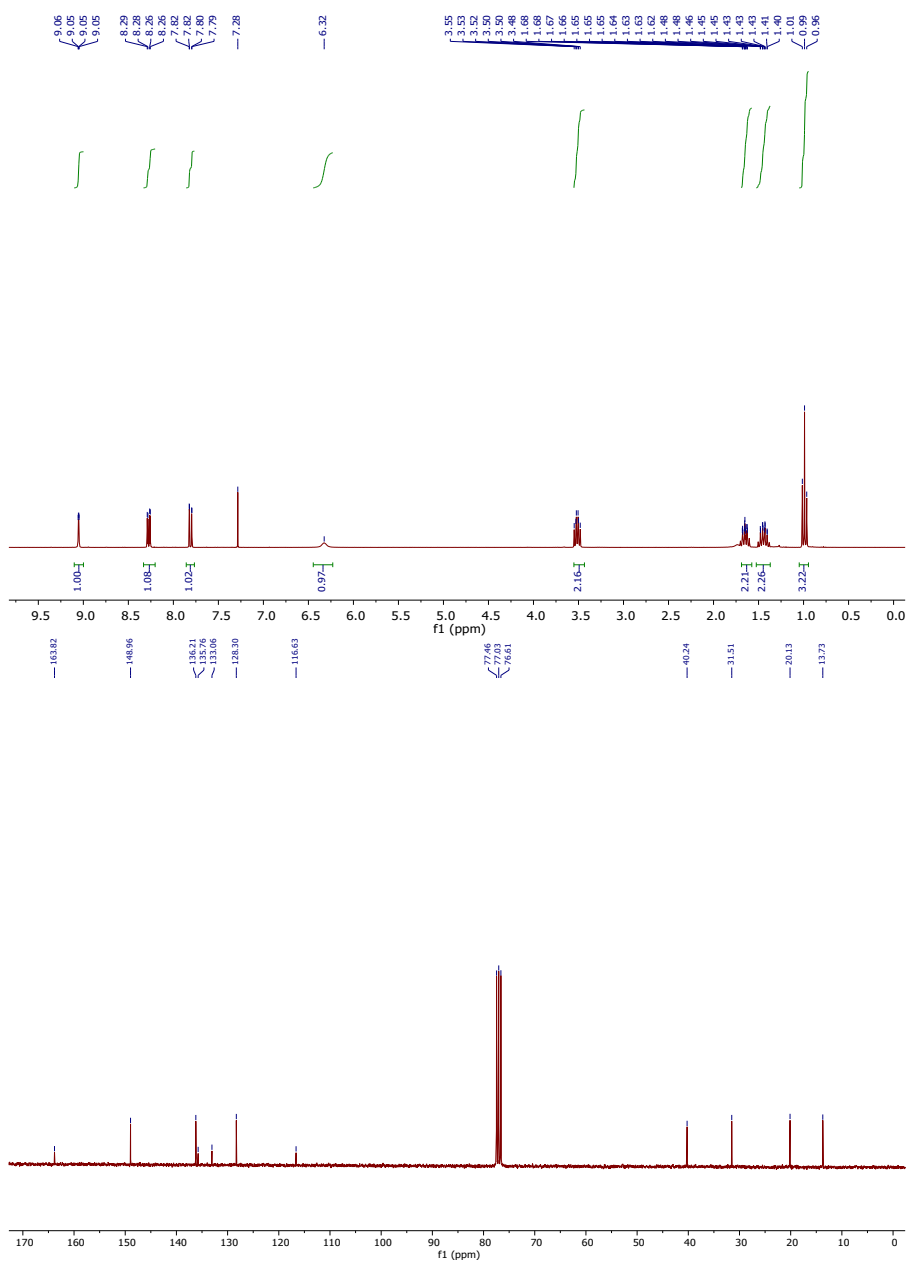

N-butyl-6-methoxypicolinamide (**3n**)





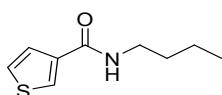

$^1\text{H}$  NMR (300 MHz, Chloroform-*d*)  $\delta$  7.77 (dd,  $J = 2.9, 1.4$  Hz, 1H), 7.36-7.22 (m, 2H), 5.95 (s, 1H), 3.36 (td,  $J = 7.1, 5.7$  Hz, 2H), 1.62-1.43 (m, 2H), 1.42-1.26 (m, 2H), 0.95-0.82 (m, 3H).

$^{13}\text{C}$  NMR (75 MHz, Chloroform-*d*)  $\delta$  163.15, 137.76, 127.90, 126.46, 125.94, 39.56, 31.79, 20.15, 13.79.

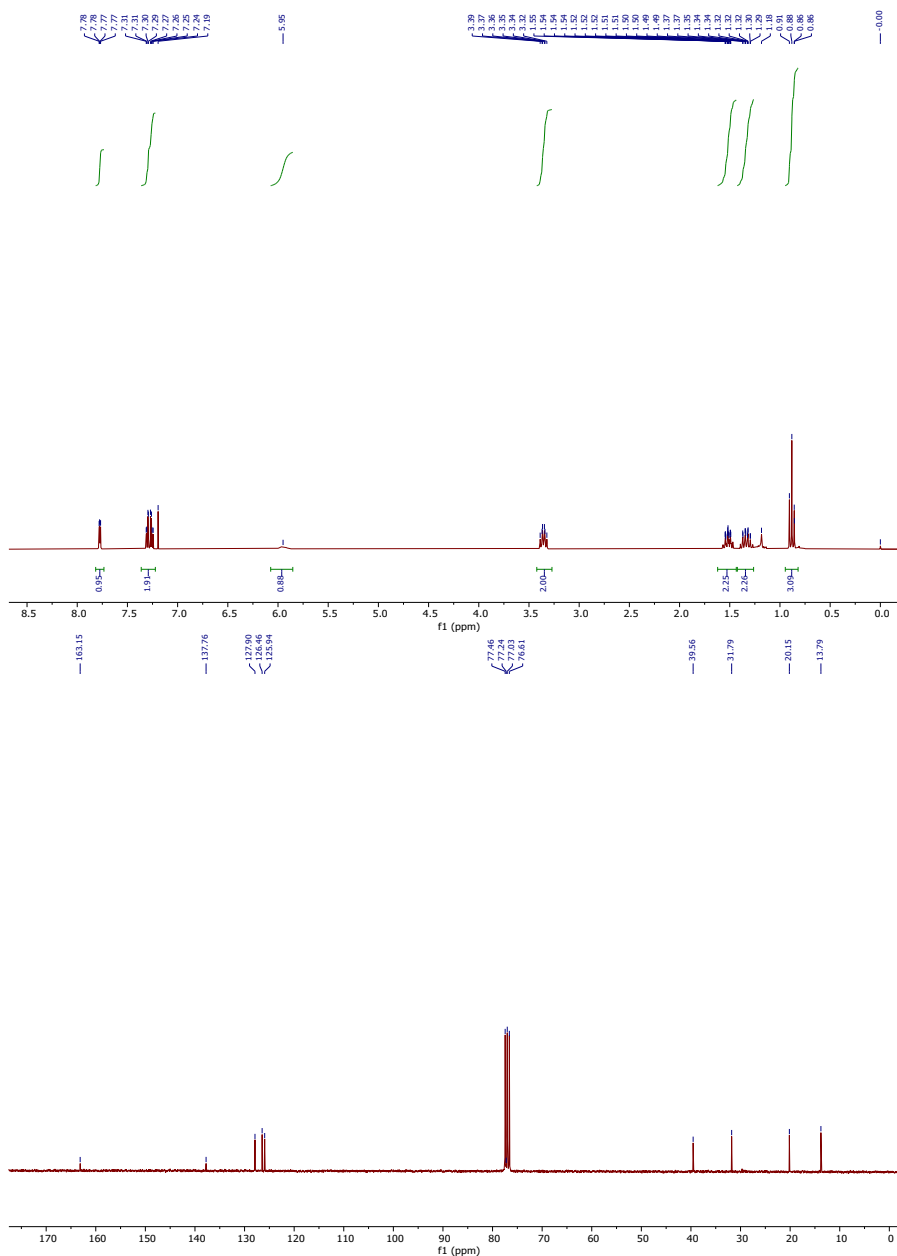

N-butylthiophene-2-carboxamide (**3p**)

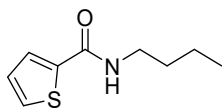

$^1\text{H}$  NMR (300 MHz, Chloroform-*d*)  $\delta$  7.45-7.37 (m, 2H), 6.99 (dd,  $J = 5.0, 3.7$  Hz, 1H), 5.95 (s, 1H), 3.36 (td,  $J = 7.2, 5.7$  Hz, 2H), 1.59-1.47 (m, 2H), 1.39-1.26 (m, 2H), 0.88 (t,  $J = 7.3$  Hz, 3H).

$^{13}\text{C}$  NMR (75 MHz, Chloroform-*d*)  $\delta$  161.87, 139.19, 129.60, 127.81, 127.56, 39.76, 31.78, 20.12, 13.78.

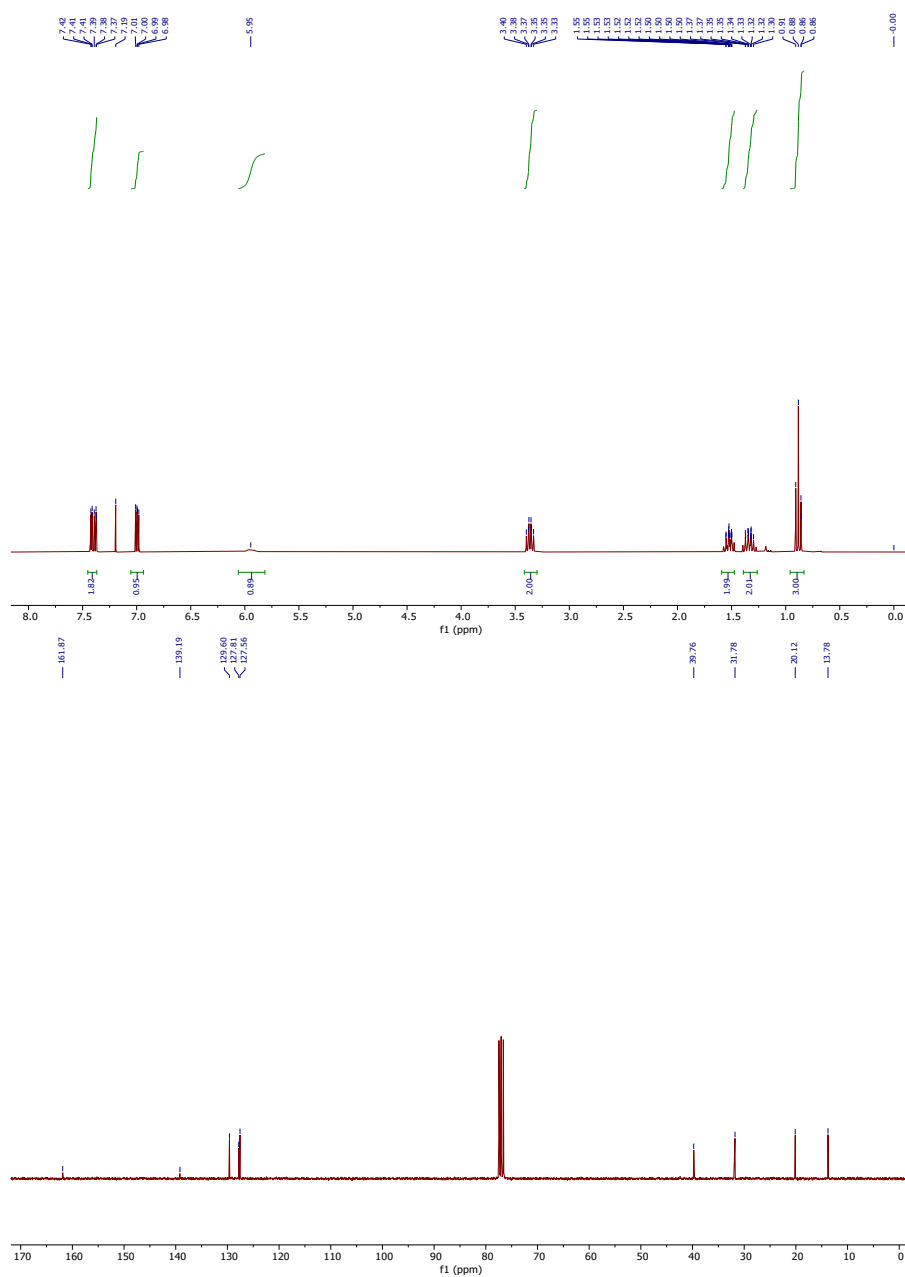

N-butylbenzamide (3q)

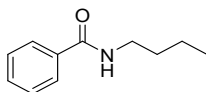

$^1\text{H}$  NMR (300 MHz, Chloroform-*d*)  $\delta$  7.71-7.66 (m, 2H), 7.46-7.32 (m, 3H), 6.04 (s, 1H), 3.40 (td,  $J$  = 7.1, 5.7 Hz, 2H), 1.59-1.50 (m, 2H), 1.41-1.30 (m, 2H), 0.93-0.87 (m, 3H).

$^{13}\text{C}$  NMR (75 MHz, Chloroform-*d*)  $\delta$  167.53, 134.90, 131.32, 128.56, 126.82, 39.81, 31.77, 20.17, 13.80.

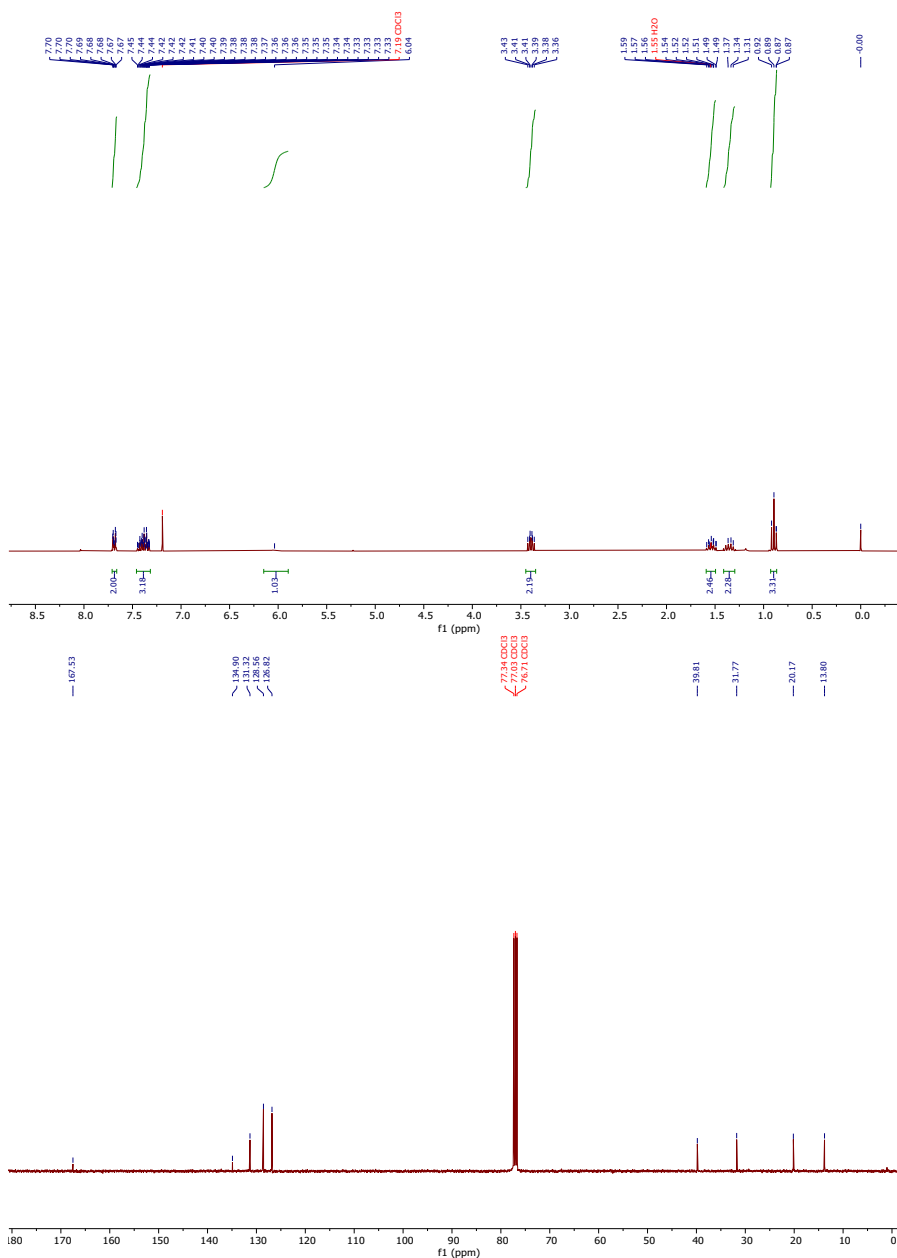

N-butyl-1-naphthamide (**3r**)



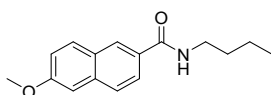

$^1\text{H}$  NMR (300 MHz, Chloroform-*d*)  $\delta$  8.18-8.10 (m, 1H), 7.77-7.66 (m, 3H), 7.16-7.04 (m, 2H), 6.17 (s, 1H), 3.87 (s, 3H), 3.44 (td,  $J = 7.2, 5.7$  Hz, 2H), 1.61-1.50 (m, 2H), 1.46-1.35 (m, 2H), 0.91 (t,  $J = 7.3$  Hz, 3H).

$^{13}\text{C}$  NMR (75 MHz, Chloroform-*d*)  $\delta$  167.63, 158.99, 136.18, 130.41, 129.85, 128.05, 127.13, 127.06, 124.18, 119.72, 105.63, 55.39, 39.90, 31.85, 20.22, 13.84.

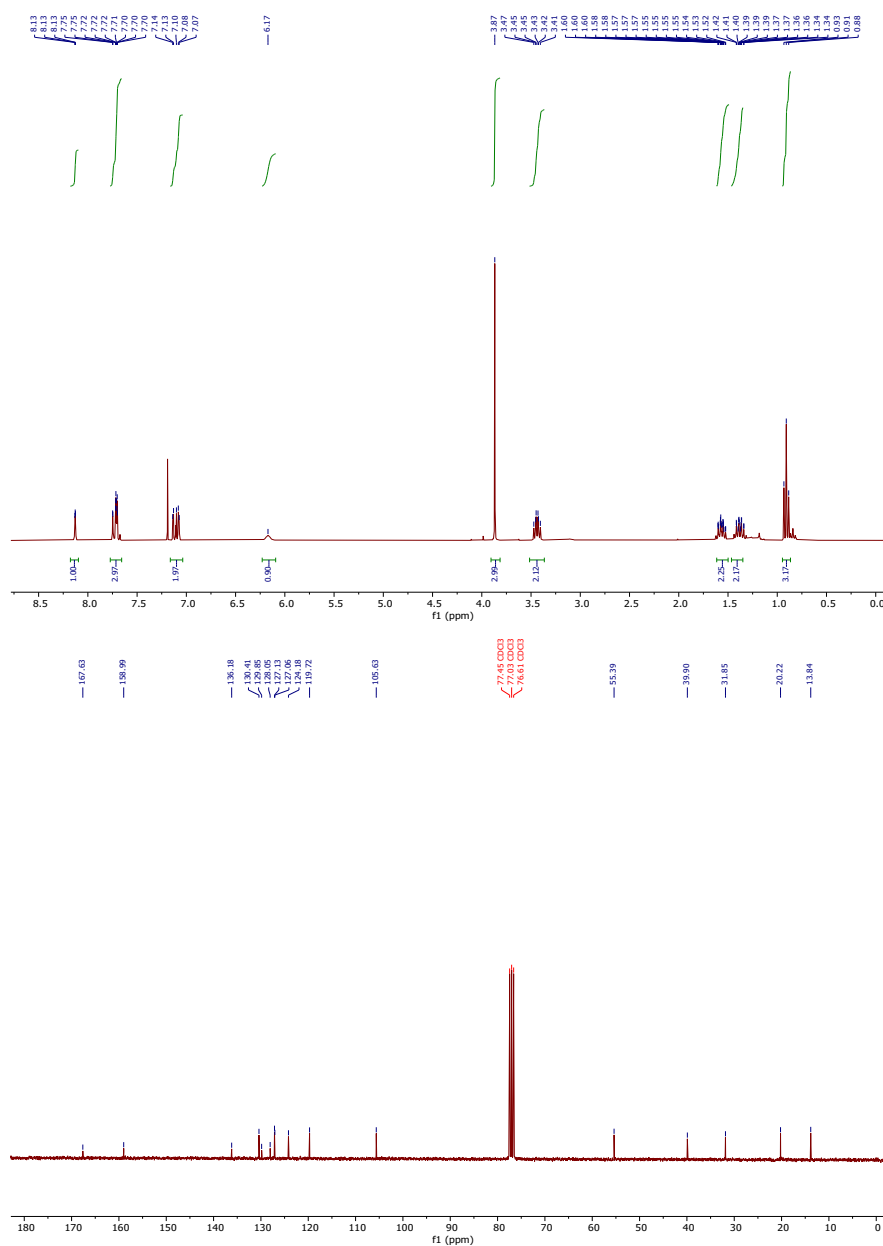

N-butyl-[1,1'-biphenyl]-4-carboxamide (**3t**)

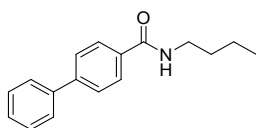

$^1\text{H}$  NMR (300 MHz, Chloroform-*d*)  $\delta$  7.91-7.81 (m, 2H), 7.73-7.60 (m, 4H), 7.53-7.37 (m, 3H), 6.23 (s, 1H), 3.51 (td,  $J = 7.2, 5.7$  Hz, 2H), 1.73-1.58 (m, 2H), 1.52-1.38 (m, 2H), 0.99 (t,  $J = 7.3$  Hz, 3H).  
 $^{13}\text{C}$  NMR (75 MHz, Chloroform-*d*)  $\delta$  167.25, 144.14, 140.07, 133.52, 128.92, 127.97, 127.37, 127.23, 127.21, 39.86, 31.80, 20.20, 13.83.

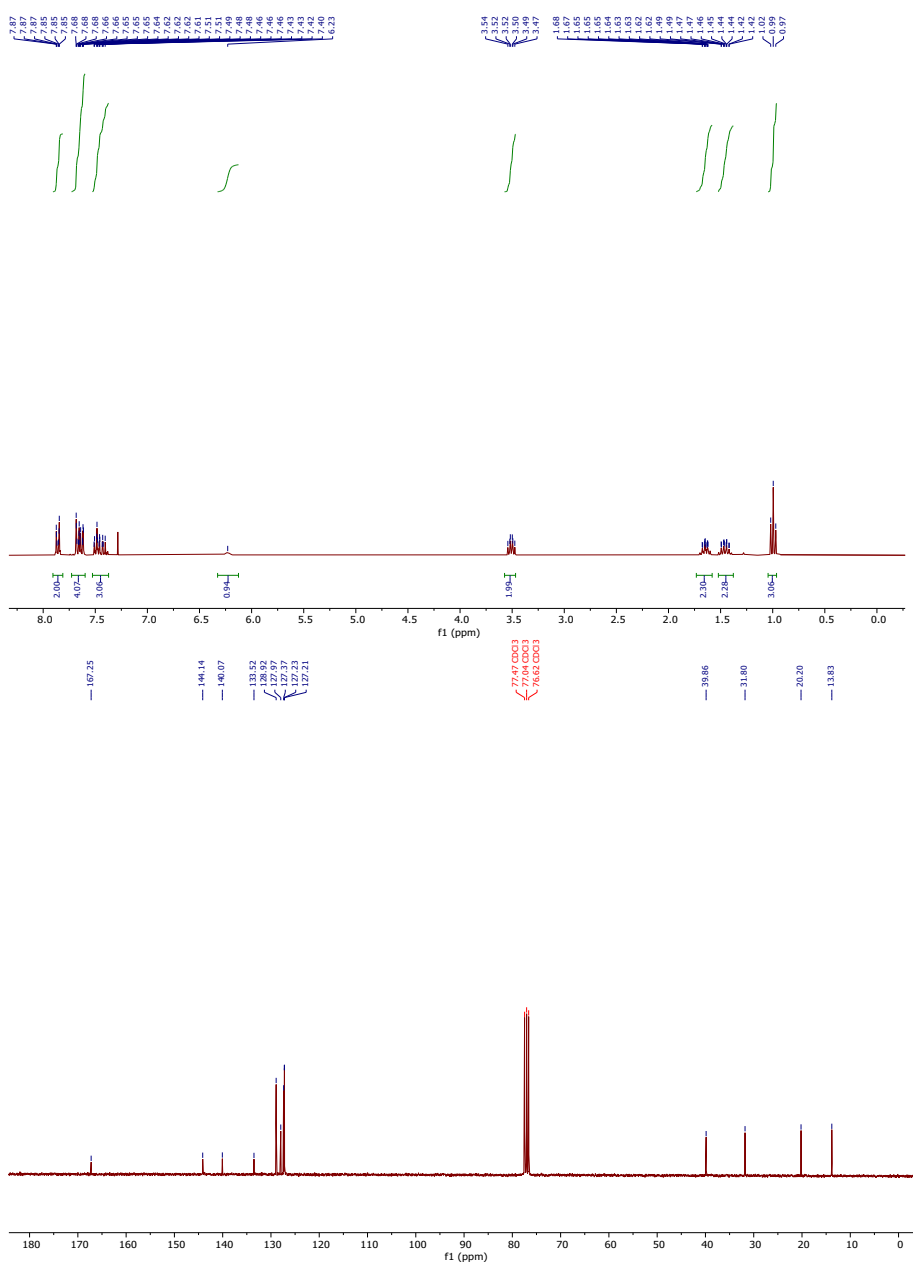

N-butyl-2-hydroxybenzamide (**3u**)





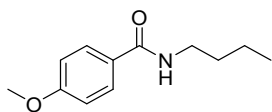

$^1\text{H}$  NMR (300 MHz, Chloroform-*d*)  $\delta$  7.80-7.55 (m, 2H), 6.92-6.69 (m, 2H), 6.31 (s, 1H), 3.75 (s, 3H), 3.34 (td,  $J = 7.2, 5.7$  Hz, 2H), 1.61-1.45 (m, 2H), 1.39-1.14 (m, 2H), 0.85 (t,  $J = 7.3$  Hz, 3H).

$^{13}\text{C}$  NMR (75 MHz, Chloroform-*d*)  $\delta$  167.13, 161.98, 128.67, 127.15, 113.63, 55.36, 39.77, 31.80, 20.18, 13.80.

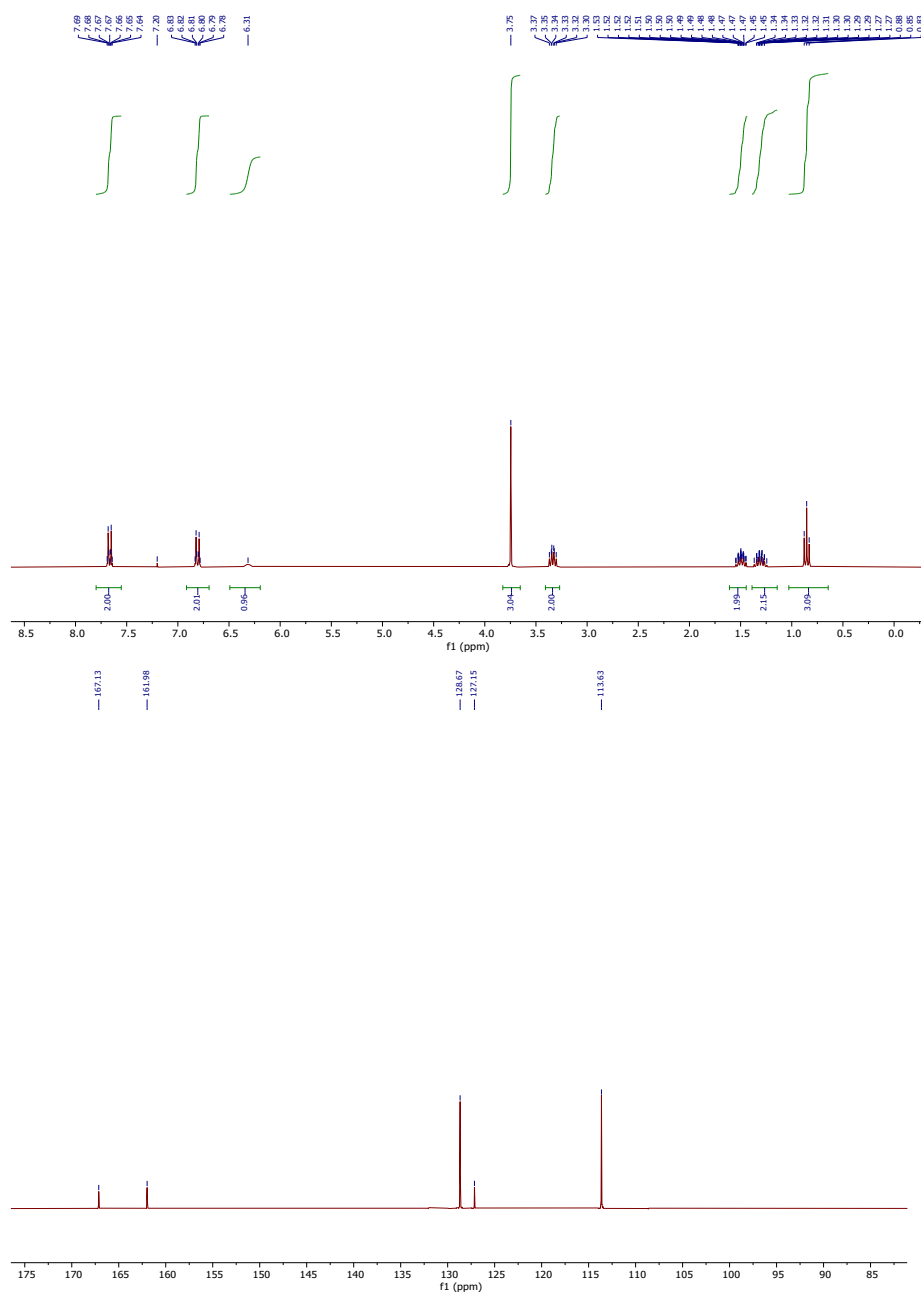

N-butyl-3-methoxybenzamide (**3w**)

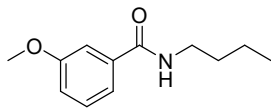

$^1\text{H}$  NMR (300 MHz, Chloroform-*d*)  $\delta$  7.32-7.16 (m, 3H), 6.99-6.91 (m, 1H), 6.14 (s, 1H), 3.76 (s, 3H), 3.37 (td,  $J = 7.1, 5.7$  Hz, 2H), 1.59-1.46 (m, 2H), 1.42-1.25 (m, 2H), 0.88 (t,  $J = 7.3$  Hz, 3H).

$^{13}\text{C}$  NMR (75 MHz, Chloroform-*d*)  $\delta$  167.40, 159.82, 136.38, 129.51, 118.55, 117.49, 112.31, 55.43, 39.84, 31.73, 20.16, 13.79.

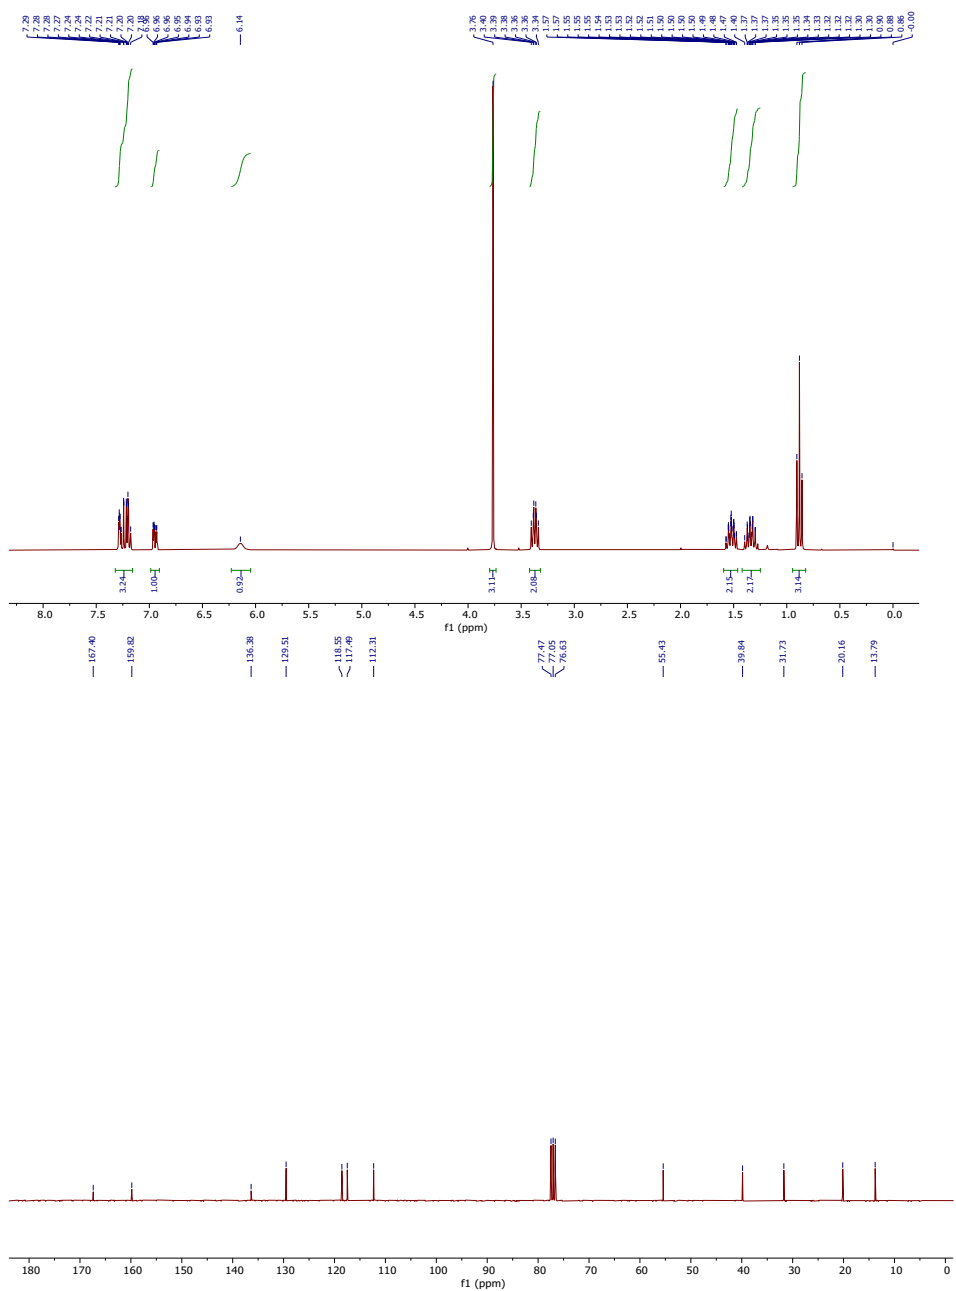

N-butyl-3,5-dimethoxybenzamide (**3x**)

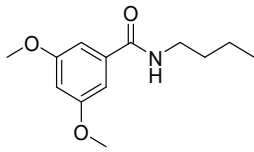

$^1\text{H}$  NMR (300 MHz, Chloroform-*d*)  $\delta$  6.81 (d,  $J = 2.3$  Hz, 2H), 6.48 (t,  $J = 2.3$  Hz, 1H), 6.15 (s, 1H), 3.74 (s, 6H), 3.35 (td,  $J = 7.1, 5.7$  Hz, 2H), 1.59-1.44 (m, 2H), 1.39-1.26 (m, 2H), 0.87 (t,  $J = 7.3$  Hz, 3H).

$^{13}\text{C}$  NMR (75 MHz, Chloroform-*d*)  $\delta$  167.38, 160.85, 137.12, 104.82, 103.31, 55.55, 39.85, 31.69, 20.15, 13.79.

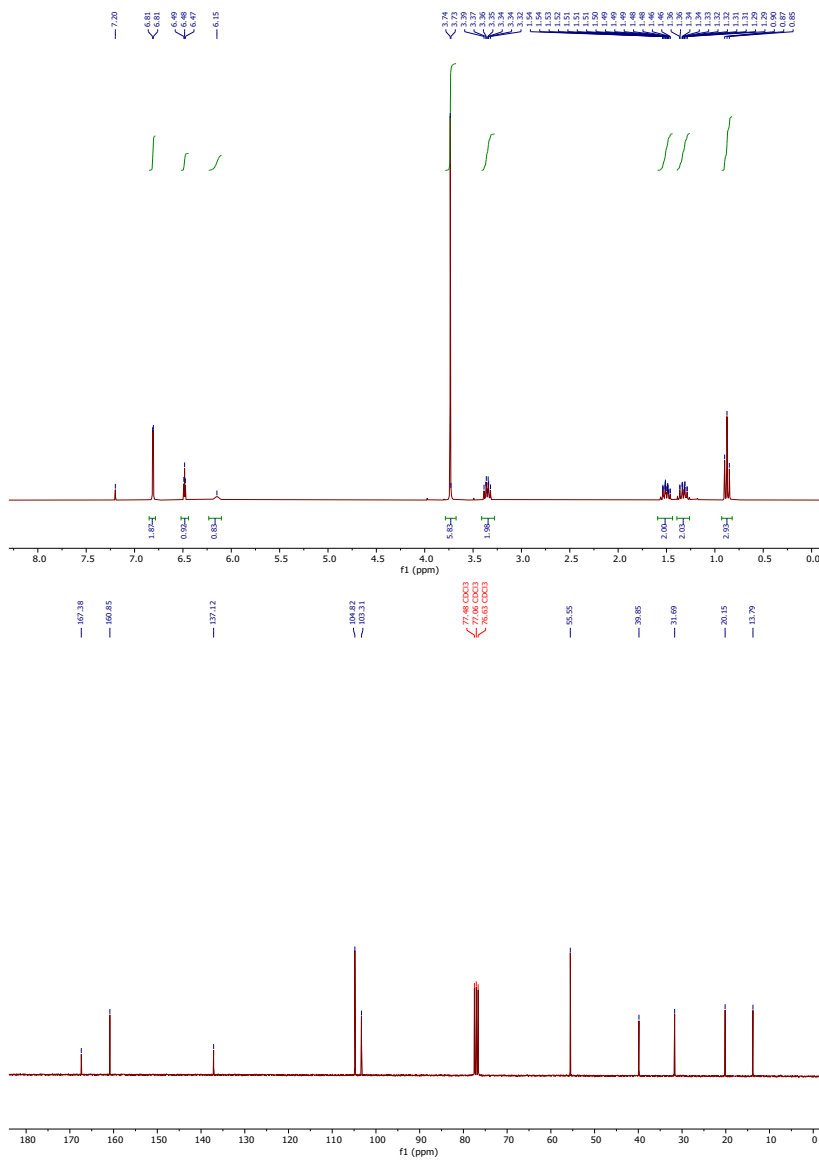

4-(butylcarbamoyl)benzyl acetate (**3y**)

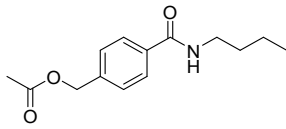

$^1\text{H}$  NMR (300 MHz, Chloroform-*d*)  $\delta$  7.73-7.66 (m, 2H), 7.39-7.28 (m, 2H), 6.14 (s, 1H), 5.06 (s, 2H), 3.38 (td,  $J = 7.1, 5.7$  Hz, 2H), 2.05 (s, 3H), 1.59-1.47 (m, 2H), 1.40-1.28 (m, 2H), 0.88 (t,  $J = 7.3$  Hz, 3H).

$^{13}\text{C}$  NMR (75 MHz, Chloroform-*d*)  $\delta$  170.78, 167.10, 139.28, 134.64, 128.08, 127.13, 65.56, 39.86, 31.72, 20.95, 20.16, 13.79.

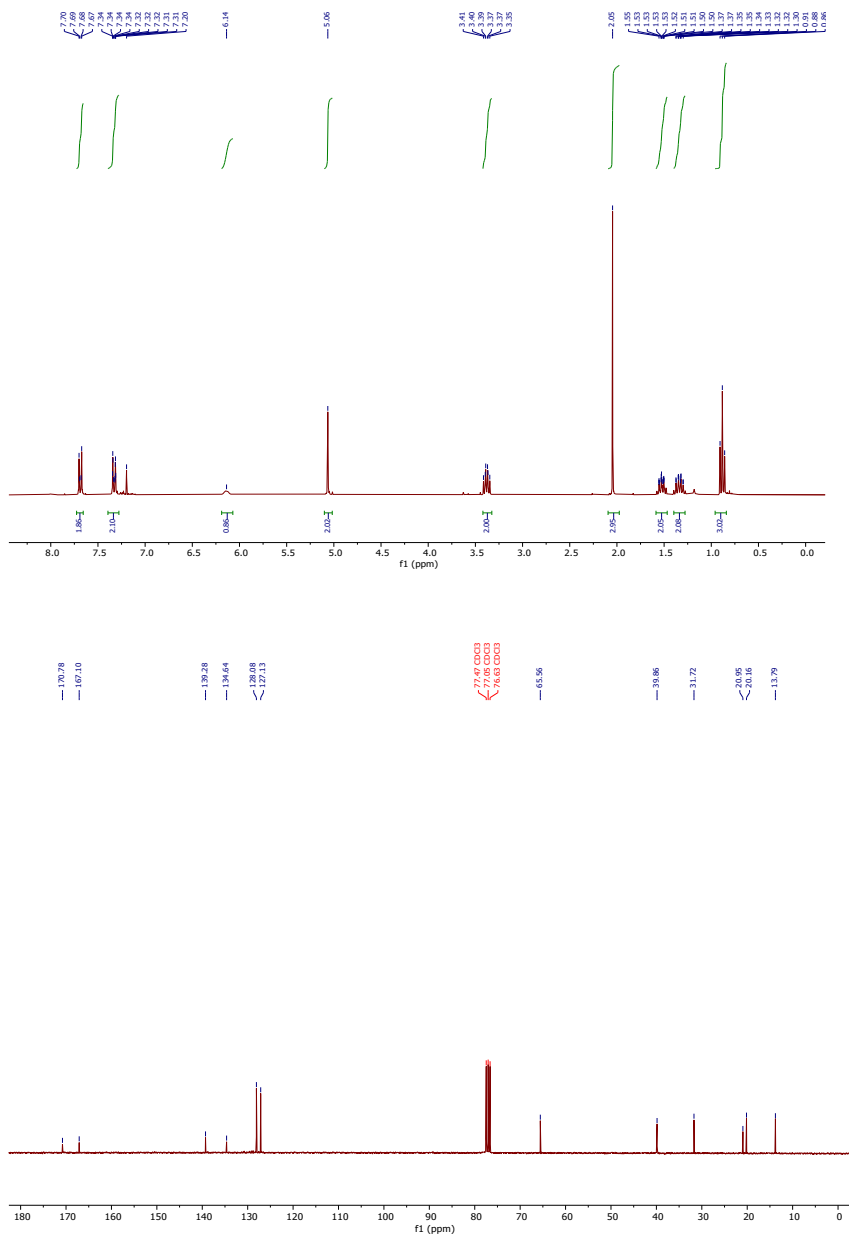

N-butyl-3-(methylthio)benzamide (**3z**)



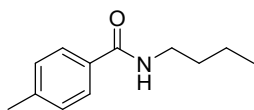

$^1\text{H}$  NMR (300 MHz, Chloroform-*d*)  $\delta$  7.59 (d,  $J = 8.2$  Hz, 2H), 7.16-6.94 (m, 2H), 6.28 (s, 1H), 3.35 (td,  $J = 7.2, 5.7$  Hz, 2H), 2.30 (s, 3H), 1.60-1.41 (m, 2H), 1.41-1.22 (m, 2H), 0.86 (t,  $J = 7.3$  Hz, 3H).  
 $^{13}\text{C}$  NMR (75 MHz, Chloroform-*d*)  $\delta$  167.58, 141.61, 131.98, 129.14, 126.88, 39.78, 31.76, 21.41, 20.17, 13.80.

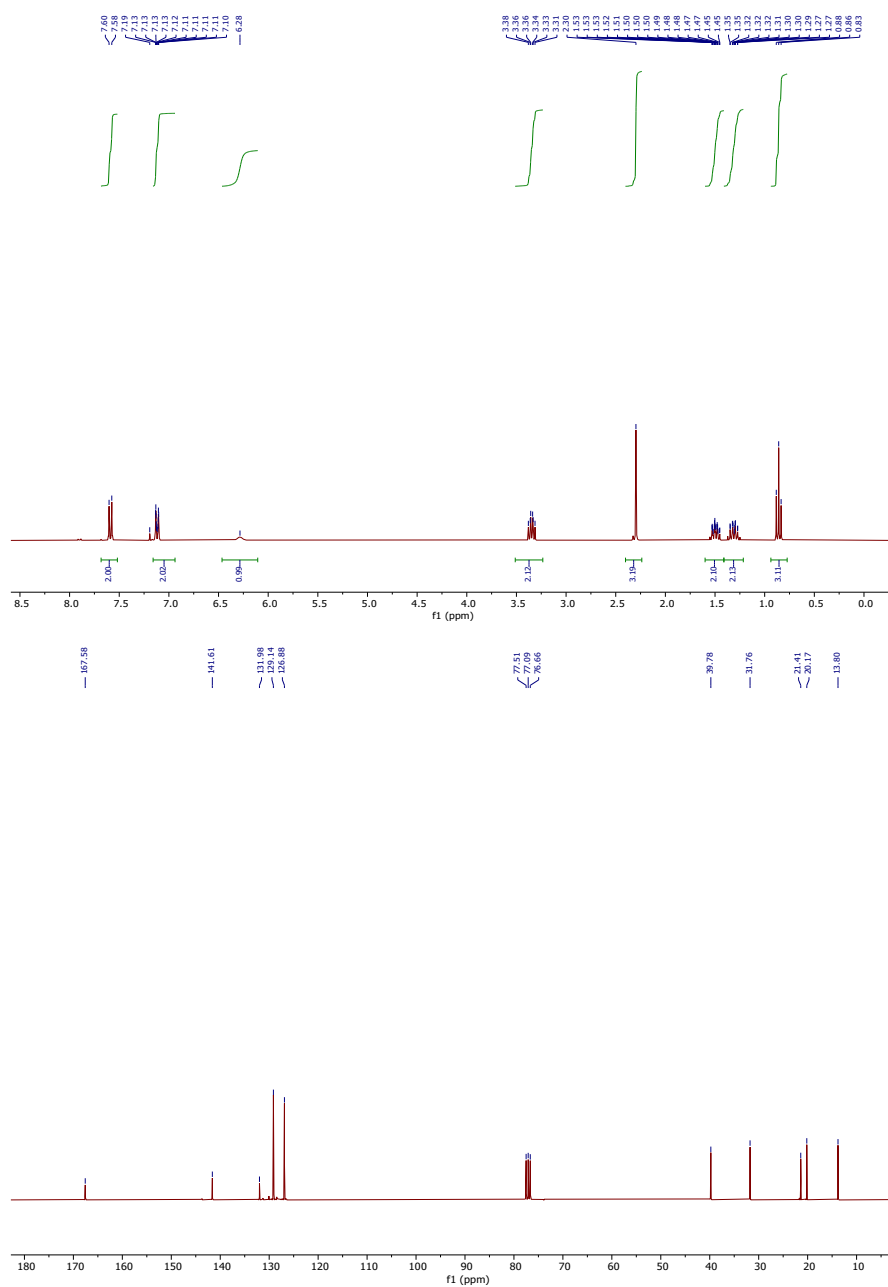

N-butyl-2-methylbenzamide (**3ab**)



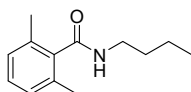

$^1\text{H}$  NMR (300 MHz, Chloroform-*d*)  $\delta$  7.08 (dd,  $J = 8.3, 6.9$  Hz, 1H), 6.94 (dq,  $J = 7.6, 0.6$  Hz, 2H), 5.59 (s, 1H), 3.39 (td,  $J = 7.1, 5.8$  Hz, 2H), 2.25 (d,  $J = 0.7$  Hz, 6H), 1.60-1.48 (m, 2H), 1.41-1.27 (m, 2H), 0.89 (t,  $J = 7.3$  Hz, 3H).

$^{13}\text{C}$  NMR (75 MHz, Chloroform-*d*)  $\delta$  170.33, 137.83, 134.18, 128.63, 127.47, 39.35, 31.68, 20.19, 19.16, 13.74.

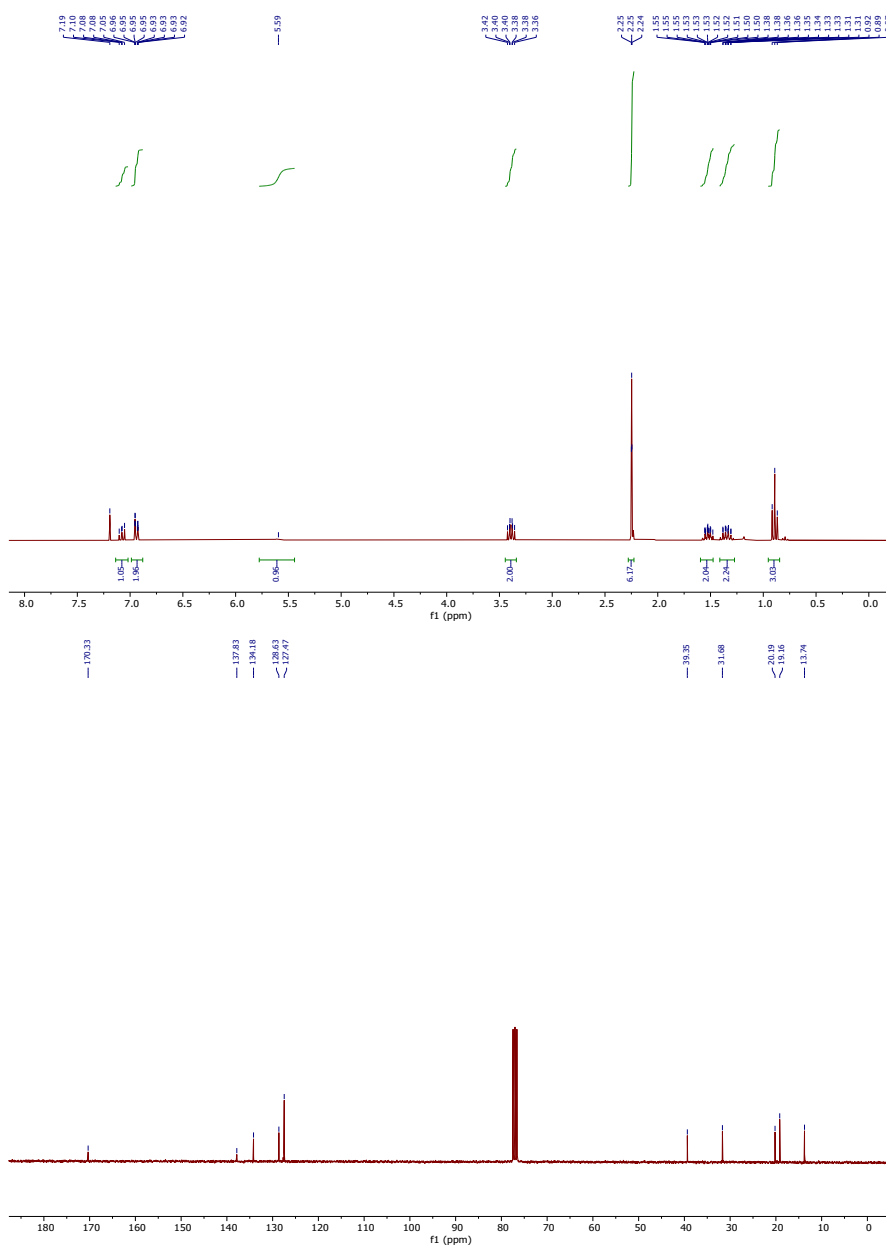

N-butyl-4-ethylbenzamide (**3ad**)



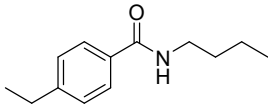

$^1\text{H}$  NMR (300 MHz, Chloroform-*d*)  $\delta$  7.65-7.58 (m, 2H), 7.22-7.10 (m, 2H), 6.22 (s, 1H), 3.36 (td,  $J = 7.1, 5.6$  Hz, 2H), 2.60 (q,  $J = 7.6$  Hz, 2H), 1.61-1.46 (m, 2H), 1.38-1.26 (m, 2H), 1.16 (t,  $J = 7.6$  Hz, 3H), 0.87 (t,  $J = 7.3$  Hz, 3H).

$^{13}\text{C}$  NMR (75 MHz, Chloroform-*d*)  $\delta$  167.55, 147.90, 132.22, 127.99, 126.96, 39.77, 31.78, 28.76, 20.17, 15.35, 13.80.

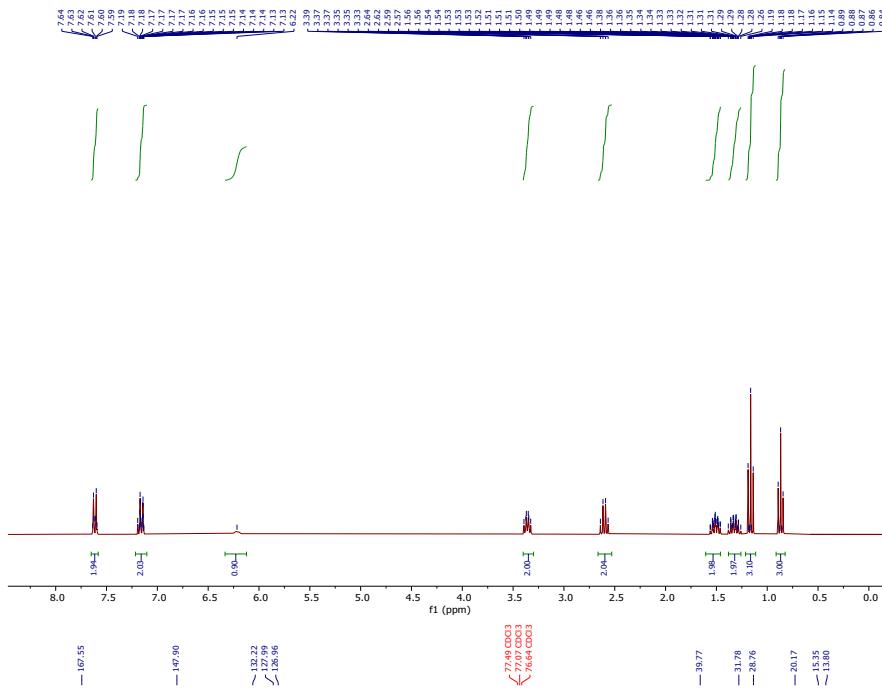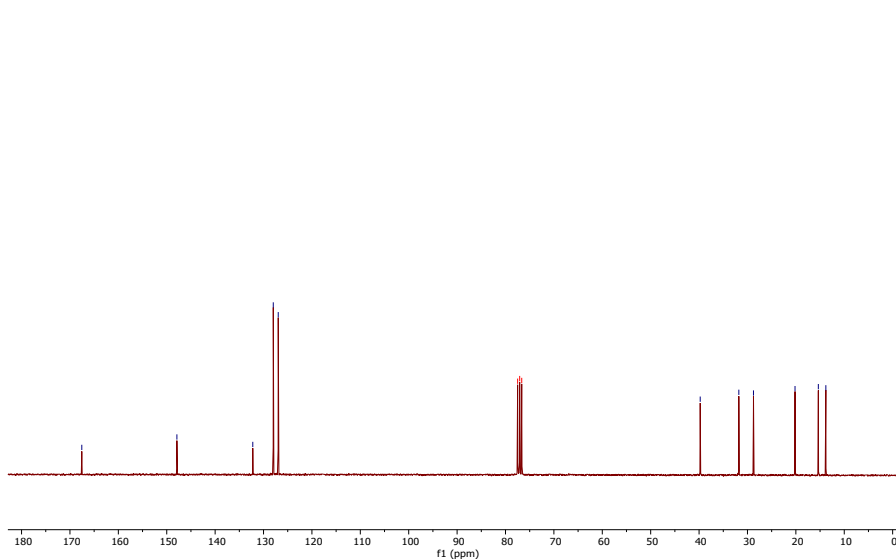

N-butyl-5-fluoro-2-methylbenzamide (**3ae**)



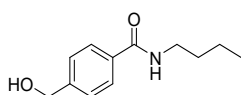

$^1\text{H}$  NMR (300 MHz, Chloroform-*d*)  $\delta$  7.54 (d,  $J = 8.3$  Hz, 2H), 7.19 (d,  $J = 8.4$  Hz, 2H), 6.54 (t,  $J = 5.8$  Hz, 1H), 4.56 (s, 2H), 3.38-3.21 (m, 3H), 1.50 (ddd,  $J = 9.2, 6.5, 1.3$  Hz, 2H), 1.36-1.24 (m, 2H), 0.86 (t,  $J = 7.3$  Hz, 3H).

$^{13}\text{C}$  NMR (75 MHz, Chloroform-*d*)  $\delta$  167.87, 144.75, 133.48, 126.97, 126.61, 64.25, 39.88, 31.64, 20.16, 13.80.

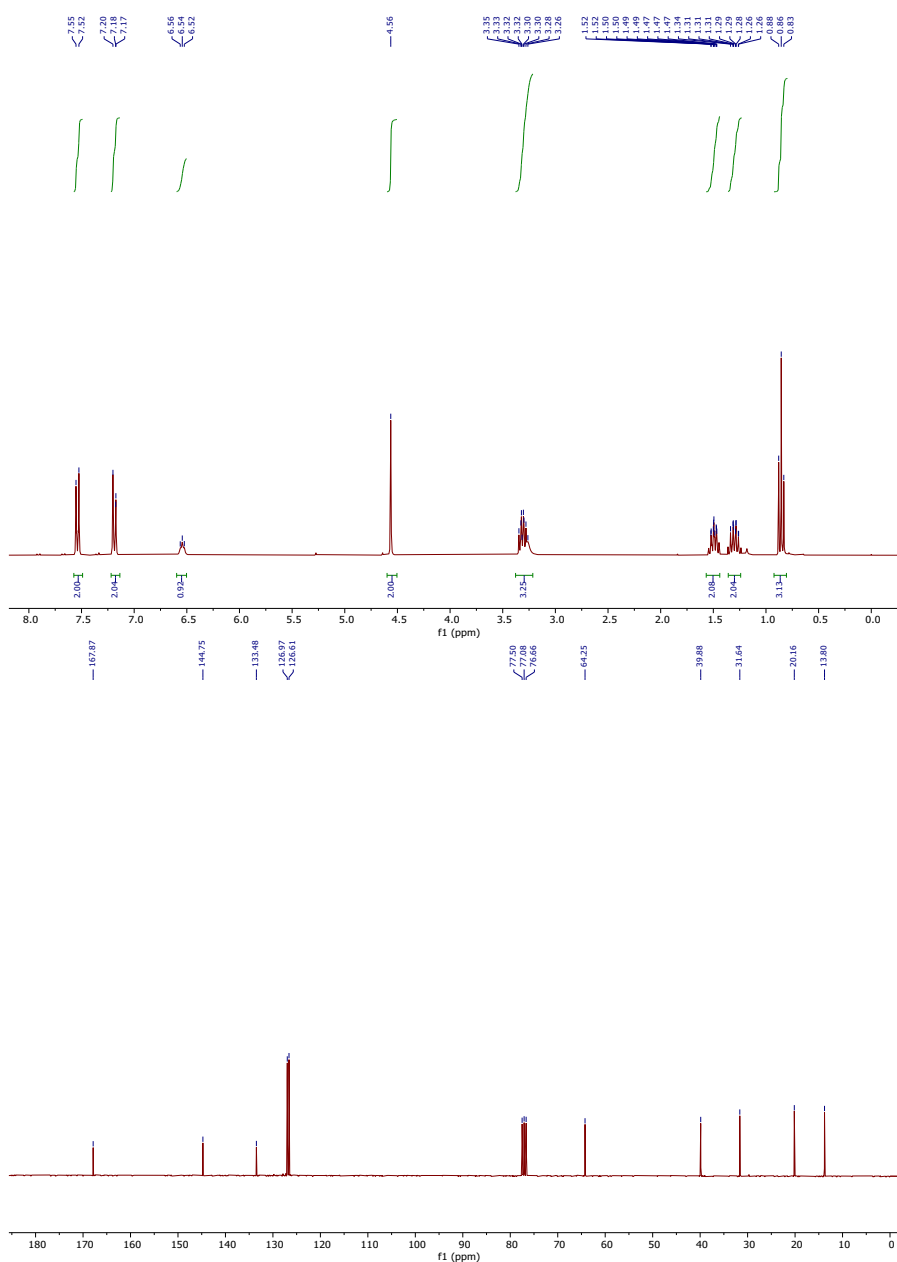

N-butyl-4-(dimethylamino)benzamide (**3ag**)

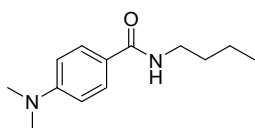

$^1\text{H}$  NMR (300 MHz, Chloroform-*d*)  $\delta$  7.60 (d,  $J = 9.0$  Hz, 2H), 6.60 (d,  $J = 8.9$  Hz, 2H), 6.02 (s, 1H), 3.35 (td,  $J = 7.1, 5.7$  Hz, 2H), 2.93 (s, 6H), 1.50 (dtdd,  $J = 8.4, 6.8, 6.0, 0.8$  Hz, 2H), 1.40-1.23 (m, 2H), 0.93-0.82 (m, 3H).

$^{13}\text{C}$  NMR (75 MHz, Chloroform-*d*)  $\delta$  167.43, 152.25, 128.30, 121.86, 111.21, 40.23, 39.62, 31.95, 20.20, 13.85.

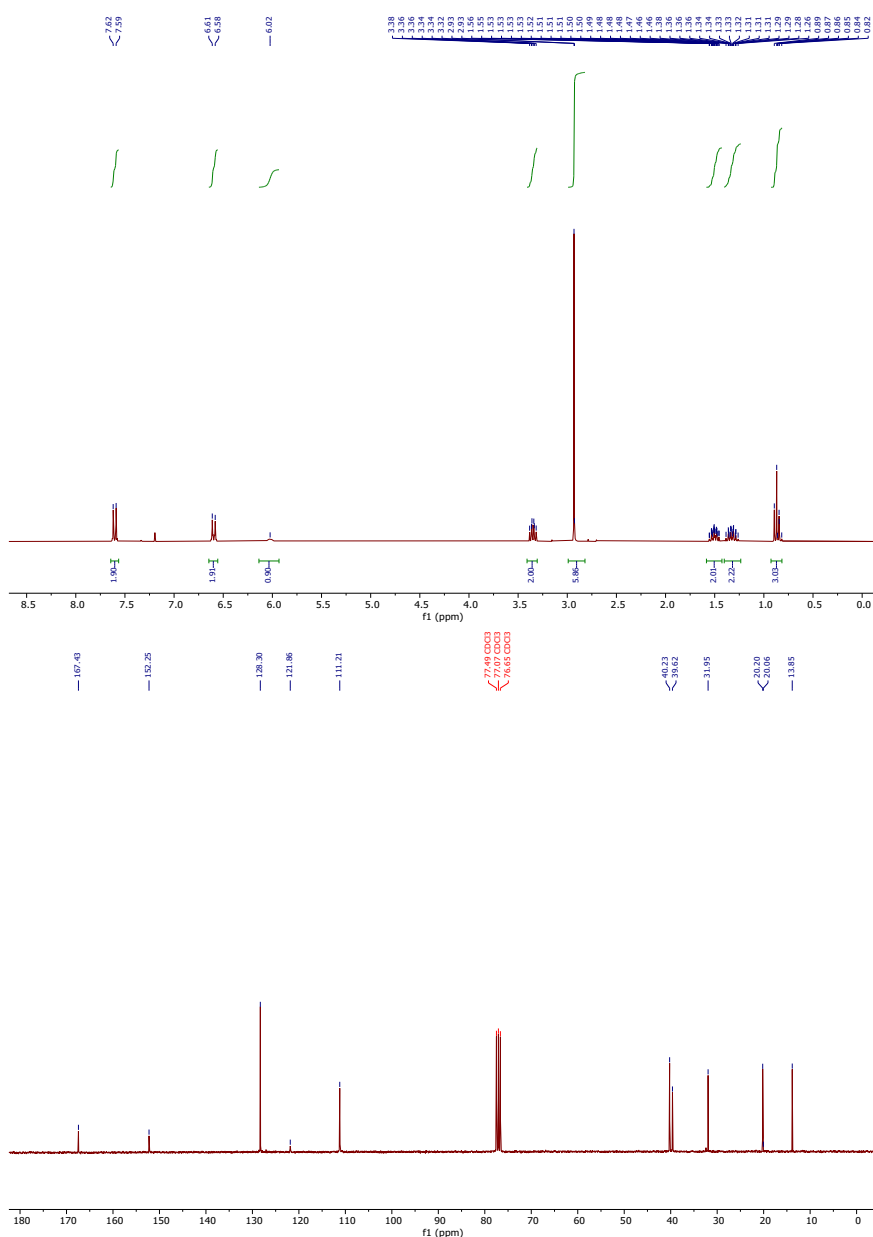

N-propylbenzamide (**3ah**)

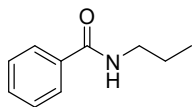

$^1\text{H}$  NMR (300 MHz, Chloroform-*d*)  $\delta$  7.79-7.66 (m, 2H), 7.51-7.30 (m, 3H), 6.17 (s, 1H), 3.35 (ddd,  $J = 7.9, 7.1, 5.8$  Hz, 2H), 1.64-1.49 (m, 2H), 0.91 (t,  $J = 7.4$  Hz, 3H).

$^{13}\text{C}$  NMR (75 MHz, Chloroform-*d*)  $\delta$  167.61, 134.87, 131.32, 128.55, 126.84, 41.78, 22.94, 11.45.

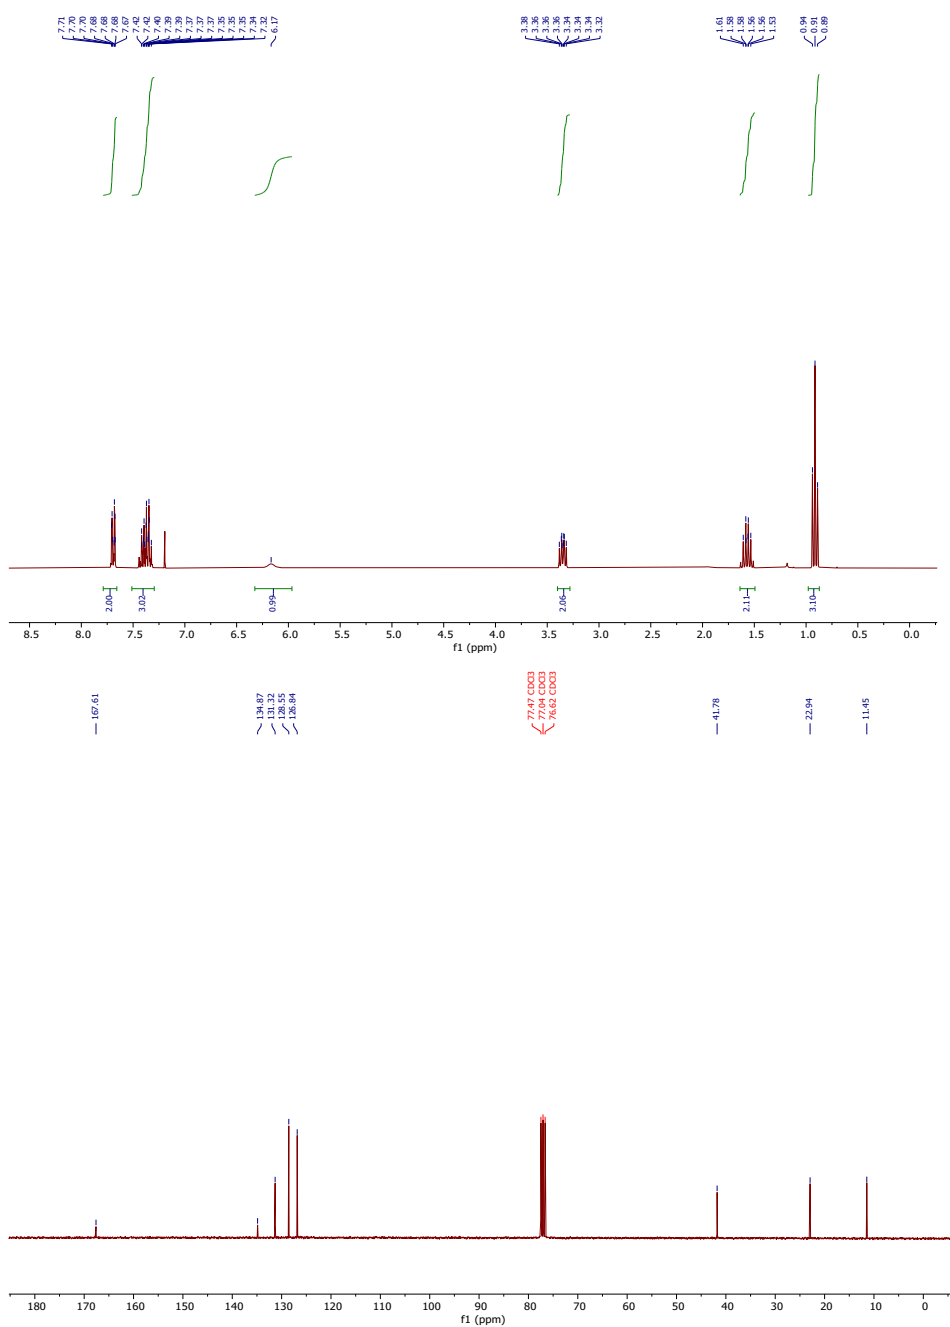

N-pentylbenzamide (**3ai**)

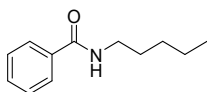

$^1\text{H}$  NMR (300 MHz, Chloroform-*d*)  $\delta$  7.76-7.64 (m, 2H), 7.47-7.28 (m, 3H), 6.25 (s, 1H), 3.36 (td,  $J$  = 7.2, 5.8 Hz, 2H), 1.59-1.47 (m, 2H), 1.28 (dq,  $J$  = 7.1, 3.5 Hz, 4H), 0.88-0.79 (m, 3H).

$^{13}\text{C}$  NMR (75 MHz, Chloroform-*d*)  $\delta$  167.57, 134.87, 131.29, 128.52, 126.86, 40.10, 29.37, 29.16, 22.40, 14.01.

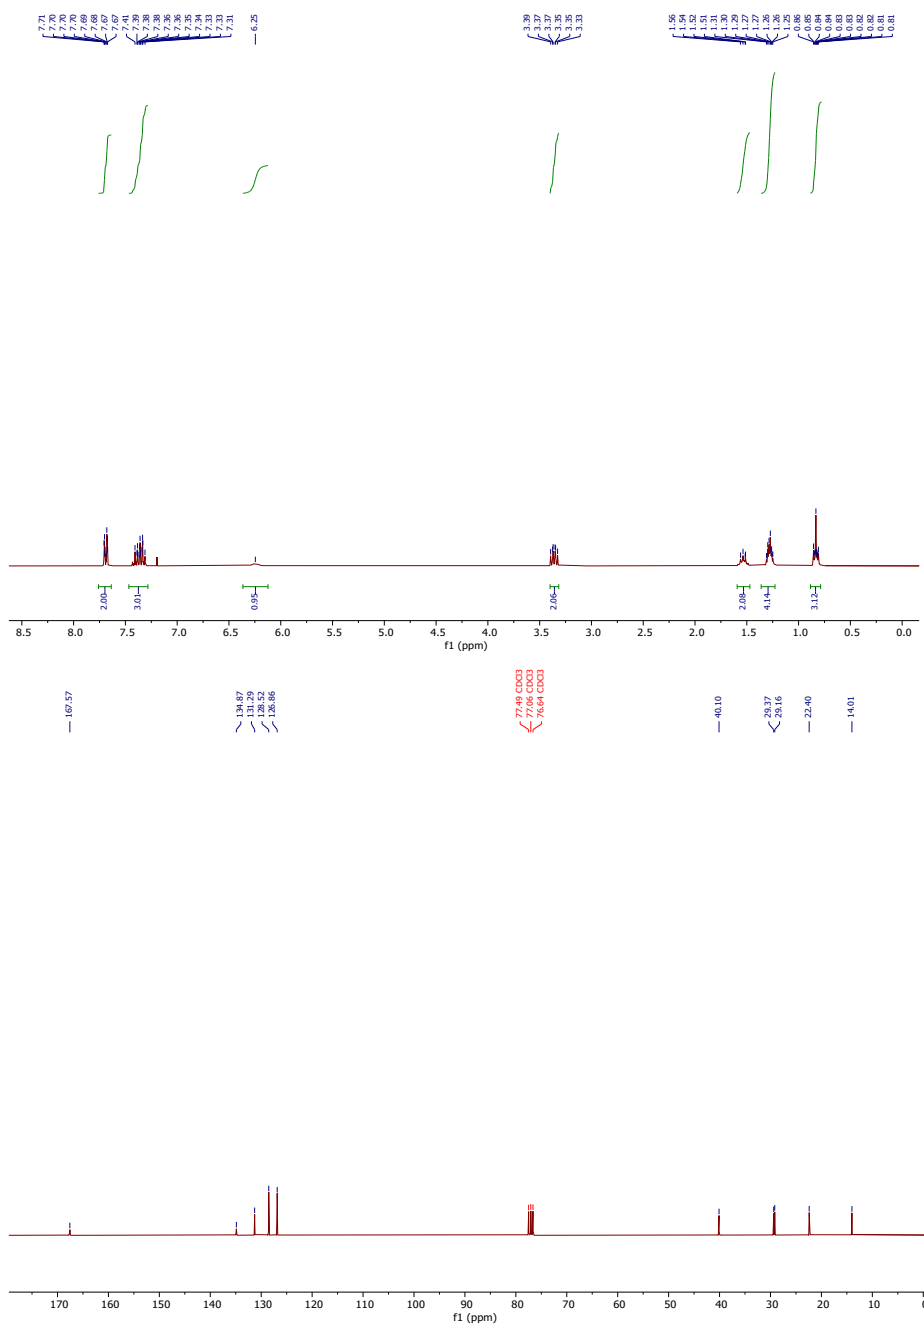

N-hexylbenzamide (**3aj**)

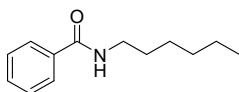

$^1\text{H}$  NMR (300 MHz, Chloroform-*d*)  $\delta$  7.74-7.64 (m, 2H), 7.46-7.27 (m, 3H), 6.27 (s, 1H), 3.36 (td,  $J$  = 7.2, 5.7 Hz, 2H), 1.53 (td,  $J$  = 7.5, 1.7 Hz, 2H), 1.37-1.15 (m, 6H), 0.87-0.74 (m, 3H).

$^{13}\text{C}$  NMR (75 MHz, Chloroform-*d*)  $\delta$  167.57, 134.89, 131.26, 128.50, 126.86, 40.13, 31.52, 29.64, 26.68, 22.56, 14.01.

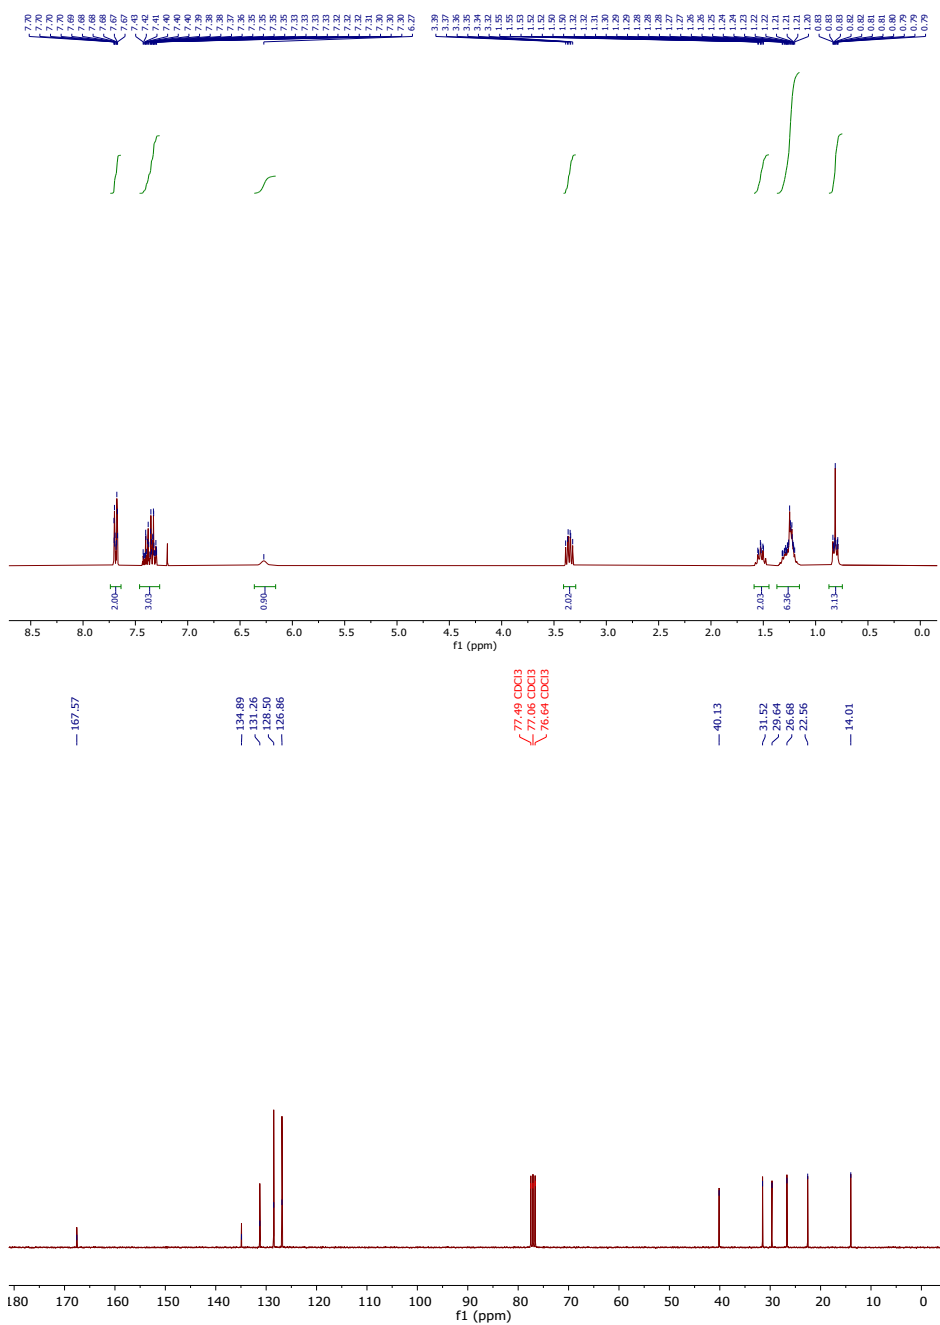

N-octylbenzamide (**3ak**)

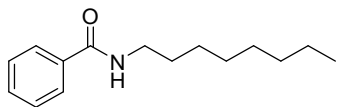

$^1\text{H}$  NMR (300 MHz, Chloroform-*d*)  $\delta$  7.75-7.63 (m, 2H), 7.46-7.29 (m, 3H), 6.26 (s, 1H), 3.36 (td,  $J$  = 7.2, 5.7 Hz, 2H), 1.60-1.47 (m, 2H), 1.29-1.12 (m, 10H), 0.85-0.74 (m, 3H).

$^{13}\text{C}$  NMR (75 MHz, Chloroform-*d*)  $\delta$  167.57, 134.88, 131.27, 128.51, 126.87, 40.14, 31.80, 29.68, 29.31, 29.23, 27.03, 22.65, 14.10.

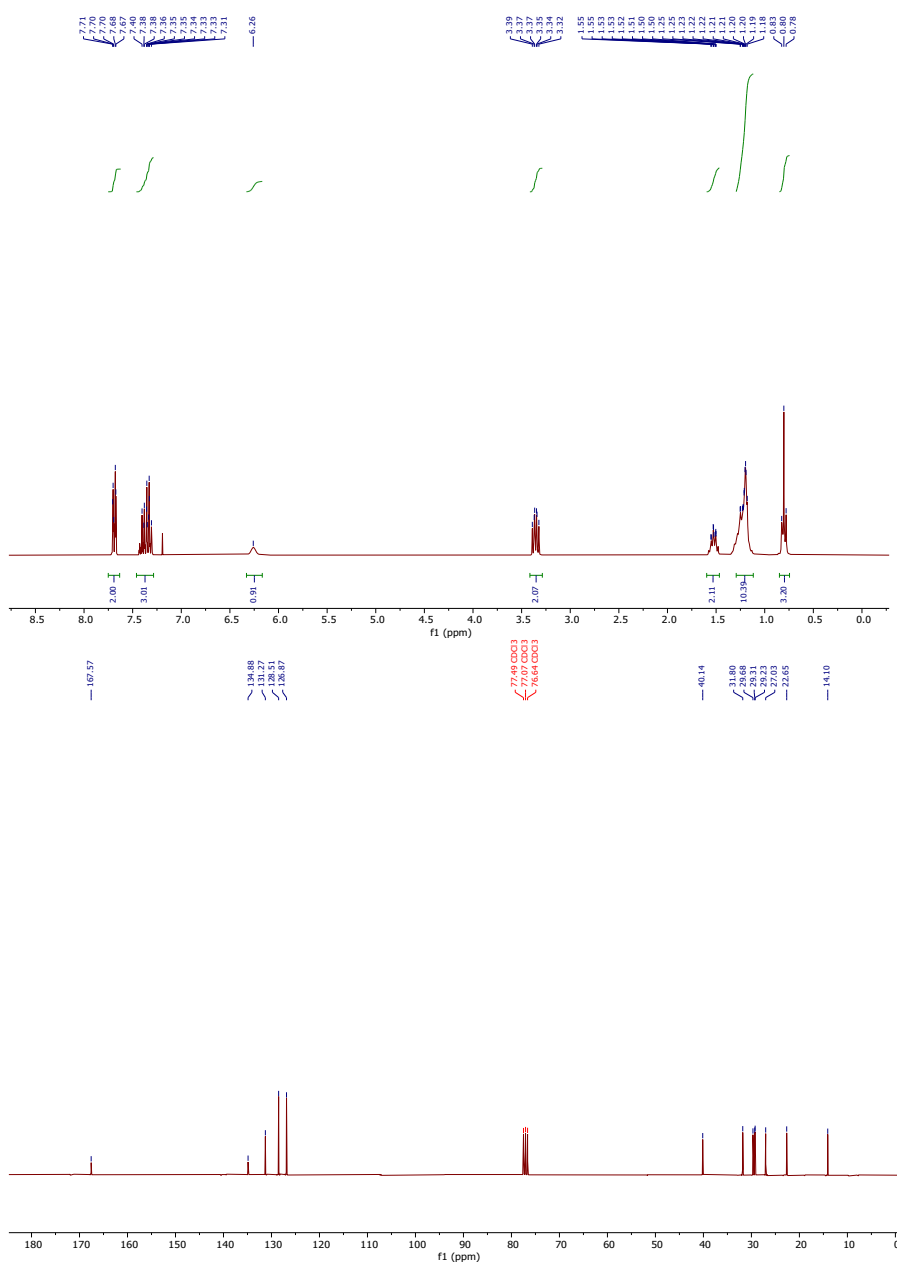

N-isopropylbenzamide (**3al**)



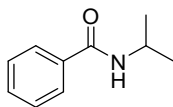

$^1\text{H}$  NMR (300 MHz, Chloroform-*d*)  $\delta$  7.72-7.64 (m, 2H), 7.43-7.27 (m, 3H), 6.07 (s, 1H), 4.20 (dp,  $J$  = 7.9, 6.6 Hz, 1H), 1.17 (d,  $J$  = 6.5 Hz, 6H).

$^{13}\text{C}$  NMR (75 MHz, Chloroform-*d*)  $\delta$  166.75, 134.99, 131.22, 128.47, 126.86, 41.89, 22.81.

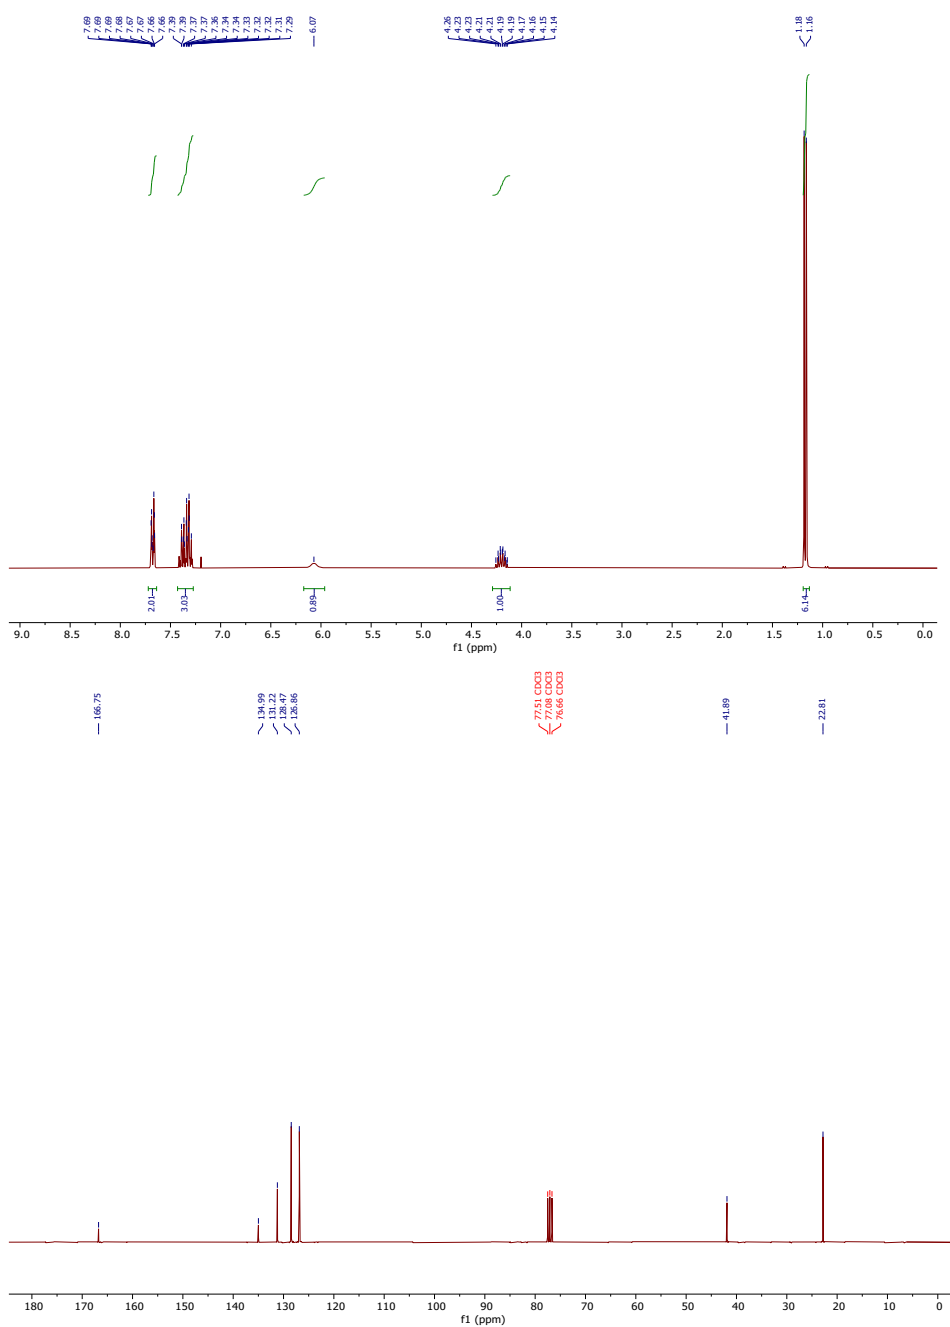

N-(tert-butyl)benzamide (**3am**)

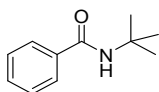

$^1\text{H}$  NMR (300 MHz, Chloroform-*d*)  $\delta$  7.46-7.42 (m, 2H), 7.35-7.29 (m, 3H), 3.65-3.30 (m, 4H), 1.85 (d,  $J = 18.0$  Hz, 5H).

$^{13}\text{C}$  NMR (75 MHz, Chloroform-*d*)  $\delta$  169.75, 137.25, 129.76, 128.24, 127.08, 49.60, 46.17, 26.39, 24.47.

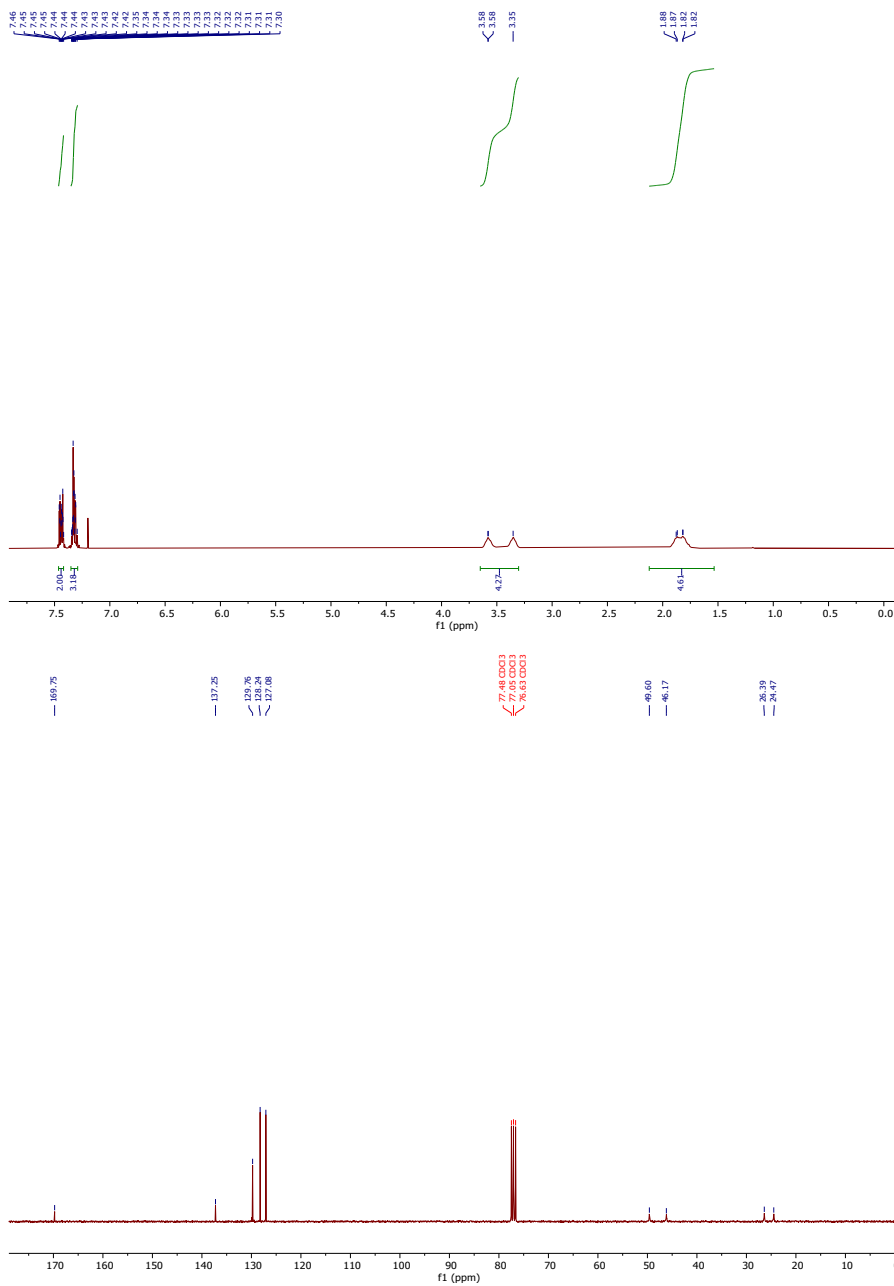

N-benzylbenzamide (**3an**)

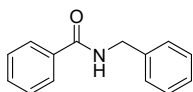

$^1\text{H}$  NMR (300 MHz, Chloroform-*d*)  $\delta$  7.85 – 7.78 (m, 2H), 7.61 – 7.21 (m, 8H), 6.64 (s, 1H), 4.65 (d,  $J = 5.6$  Hz, 2H).

$^{13}\text{C}$  NMR (75 MHz, Chloroform-*d*)  $\delta$  167.45, 138.24, 134.38, 131.57, 128.79, 128.60, 127.91, 127.61, 127.02, 44.12.

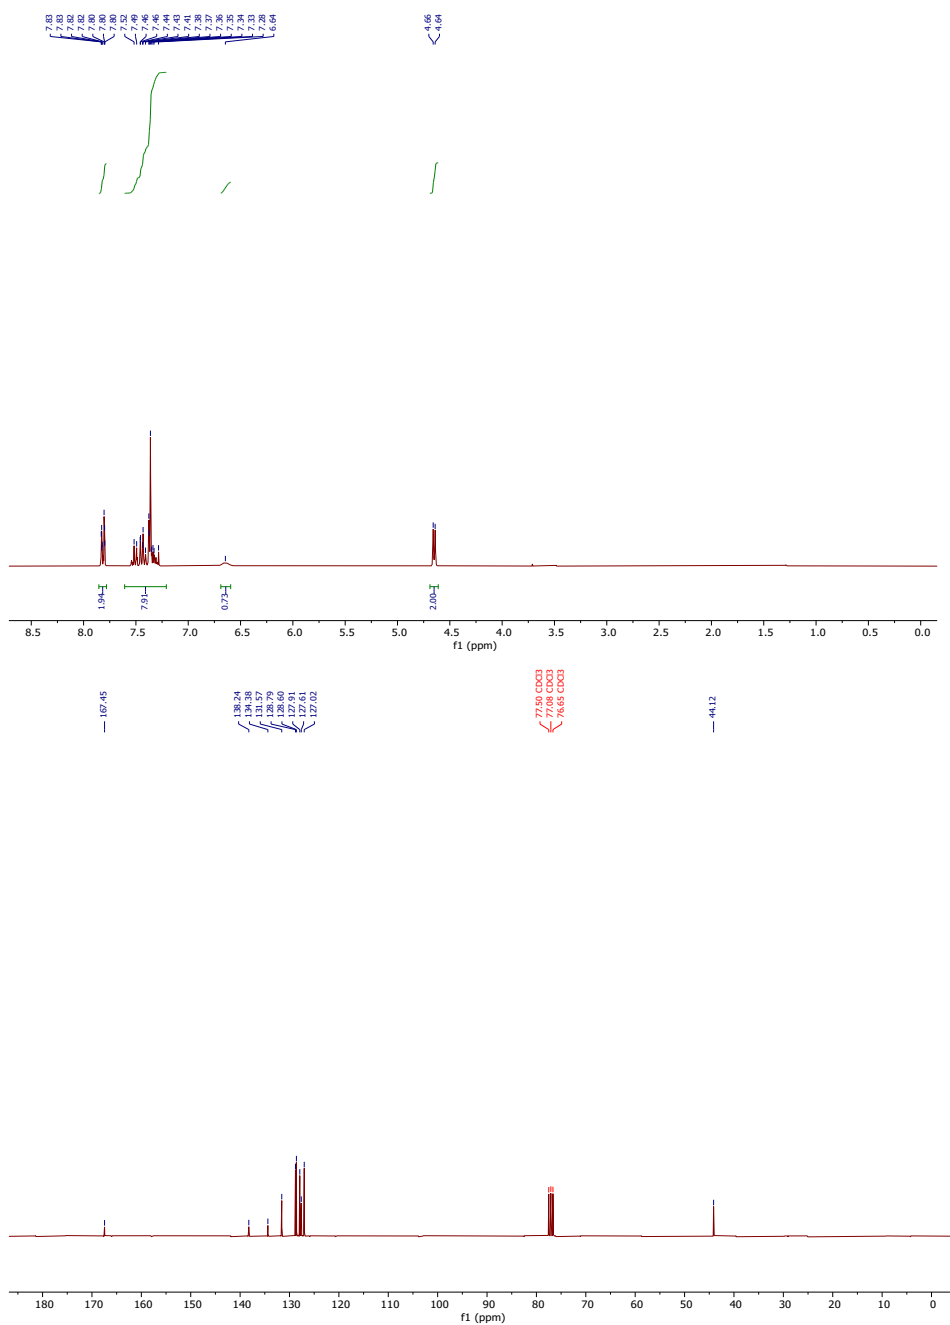

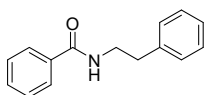

$^1\text{H}$  NMR (300 MHz, Chloroform-*d*)  $\delta$  7.65-7.57 (m, 2H), 7.44-7.13 (m, 8H), 6.15 (s, 1H), 3.64 (td,  $J$  = 6.9, 5.8 Hz, 2H), 2.86 (t,  $J$  = 6.9 Hz, 2H).

$^{13}\text{C}$  NMR (75 MHz, Chloroform-*d*)  $\delta$  167.53, 138.93, 134.65, 131.43, 128.84, 128.74, 128.58, 126.84, 126.62, 41.17, 35.72.

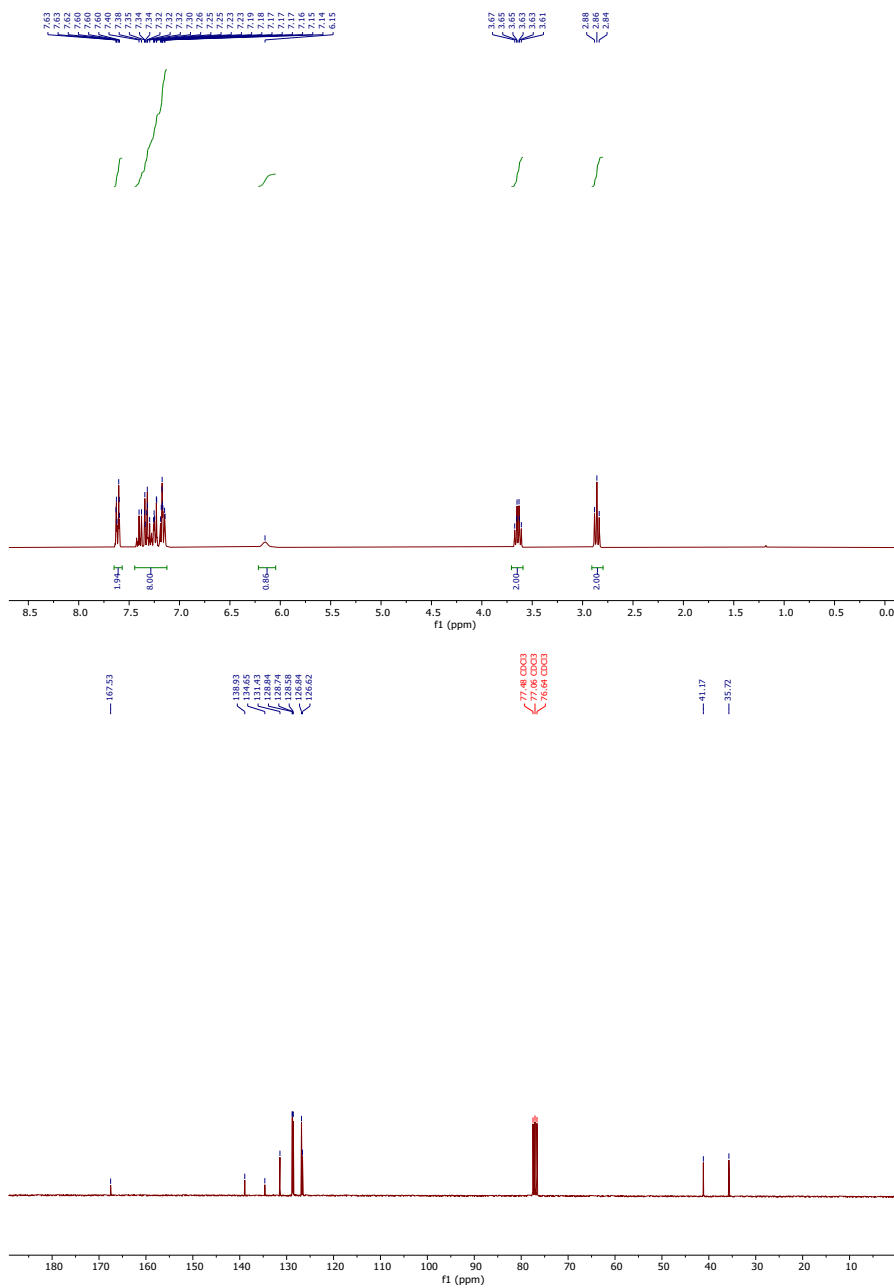

N-cyclopentylbenzamide (**3ap**)

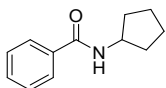

$^1\text{H}$  NMR (300 MHz, Chloroform-*d*)  $\delta$  7.71-7.65 (m, 2H), 7.44-7.29 (m, 3H), 6.04 (s, 1H), 4.33 (q,  $J = 6.9$  Hz, 1H), 2.08-1.96 (m, 2H), 1.72-1.51 (m, 4H), 1.48-1.36 (m, 2H).

$^{13}\text{C}$  NMR (75 MHz, Chloroform-*d*)  $\delta$  167.20, 134.93, 131.27, 128.52, 126.85, 51.71, 33.25, 23.82.

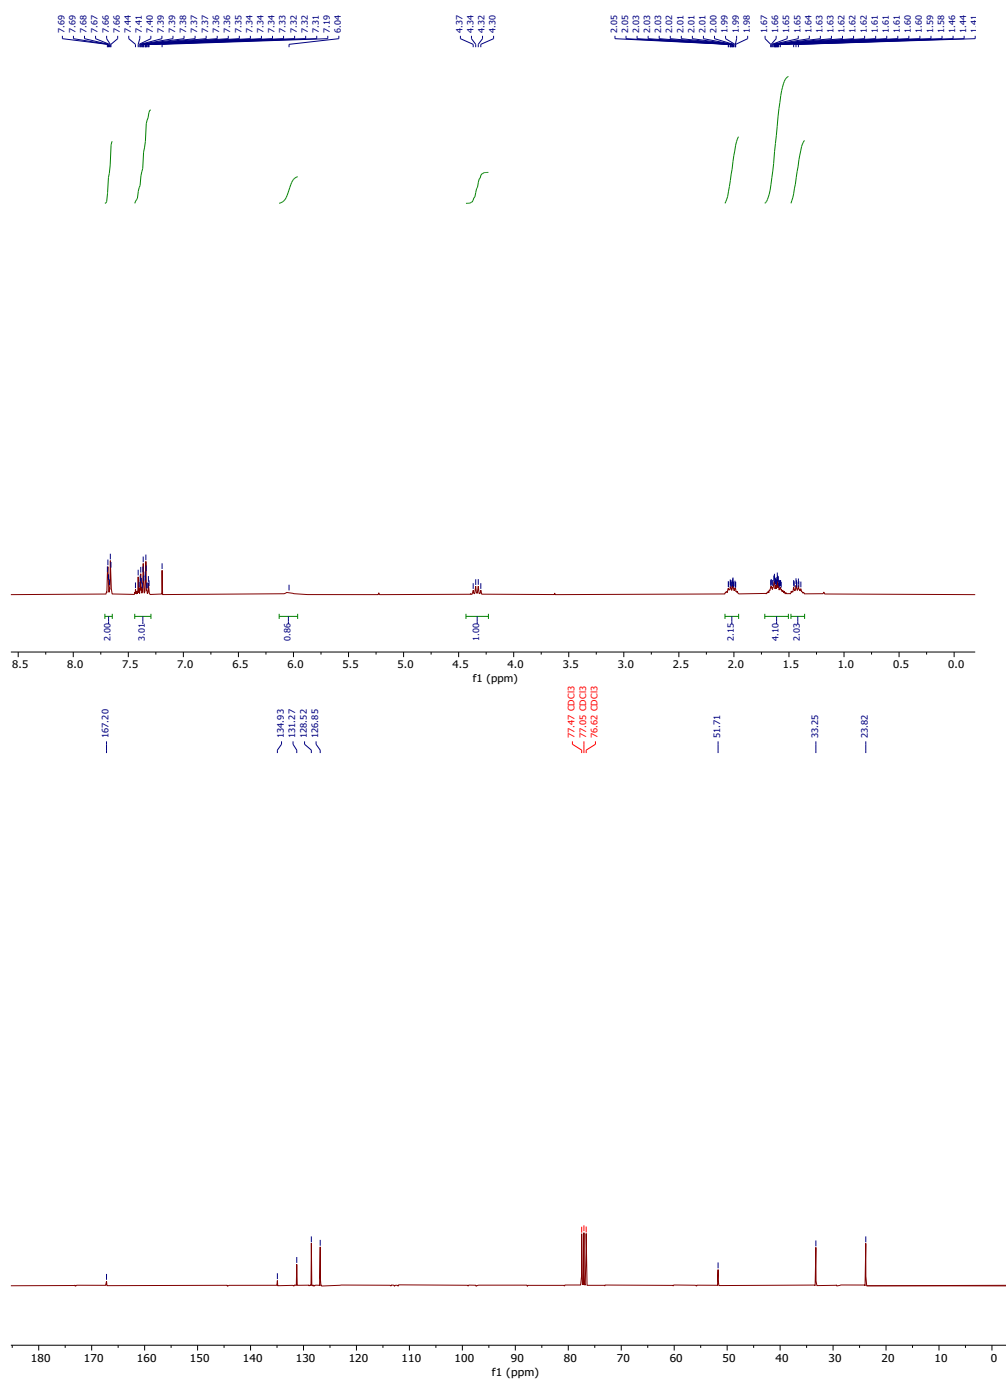

N-cyclohexylbenzamide (3aq)

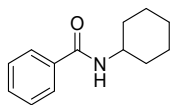

$^1\text{H}$  NMR (300 MHz, Chloroform-*d*)  $\delta$  7.73-7.63 (m, 2H), 7.46-7.27 (m, 3H), 5.98 (s, 1H), 3.90 (dddd,  $J = 10.6, 8.1, 6.6, 4.0$  Hz, 1H), 1.96 (dp,  $J = 12.0, 3.9, 3.2$  Hz, 2H), 1.74-1.51 (m, 3H), 1.44-1.04 (m, 5H).

$^{13}\text{C}$  NMR (75 MHz, Chloroform-*d*)  $\delta$  166.65, 135.13, 131.22, 128.50, 126.85, 48.69, 33.23, 25.58, 24.93.

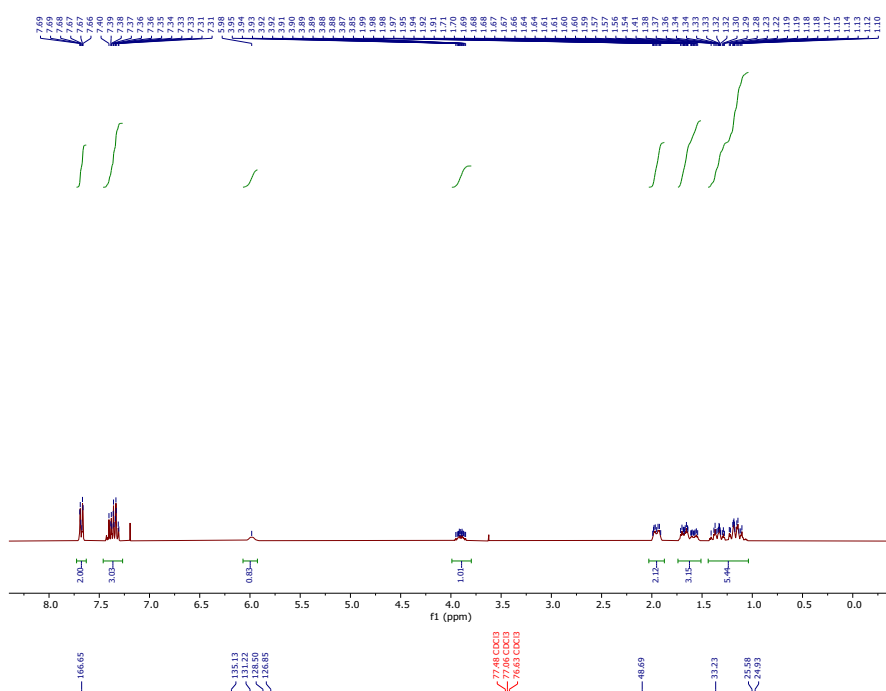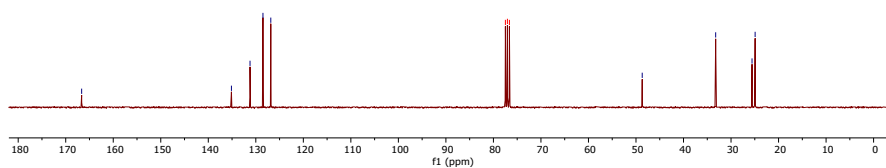

Morpholino(phenyl)methanone (**3ar**)

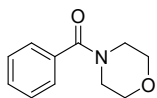

$^1\text{H}$  NMR (300 MHz, Chloroform-*d*)  $\delta$  7.42 (d,  $J = 0.8$  Hz, 5H), 3.61 (d,  $J = 66.2$  Hz, 8H).

$^{13}\text{C}$  NMR (75 MHz, Chloroform-*d*)  $\delta$  170.46, 135.32, 129.90, 128.58, 127.10, 66.91, 48.27, 42.56.

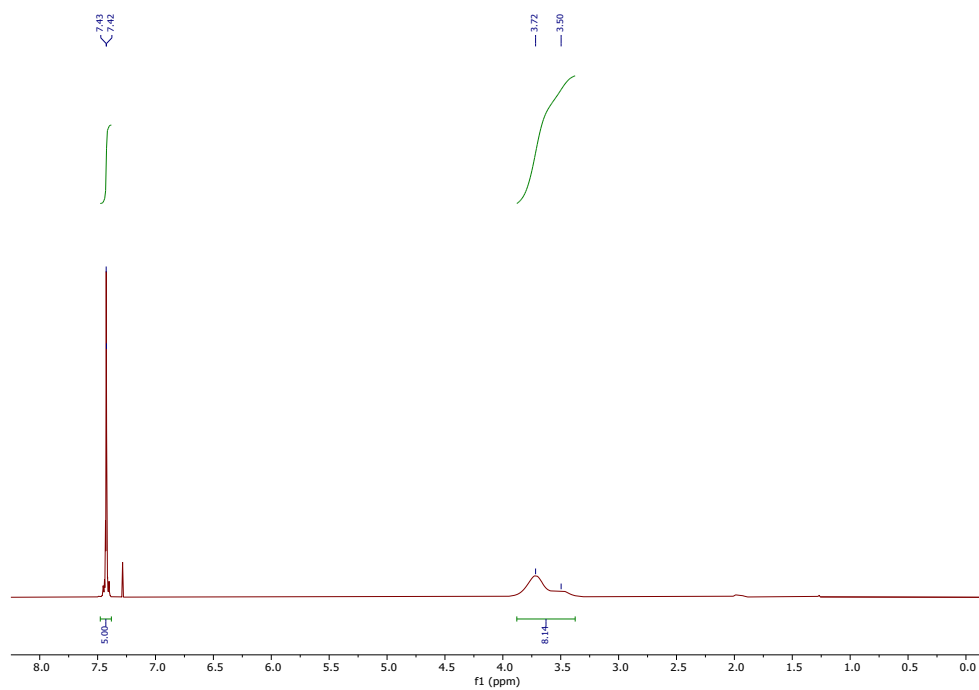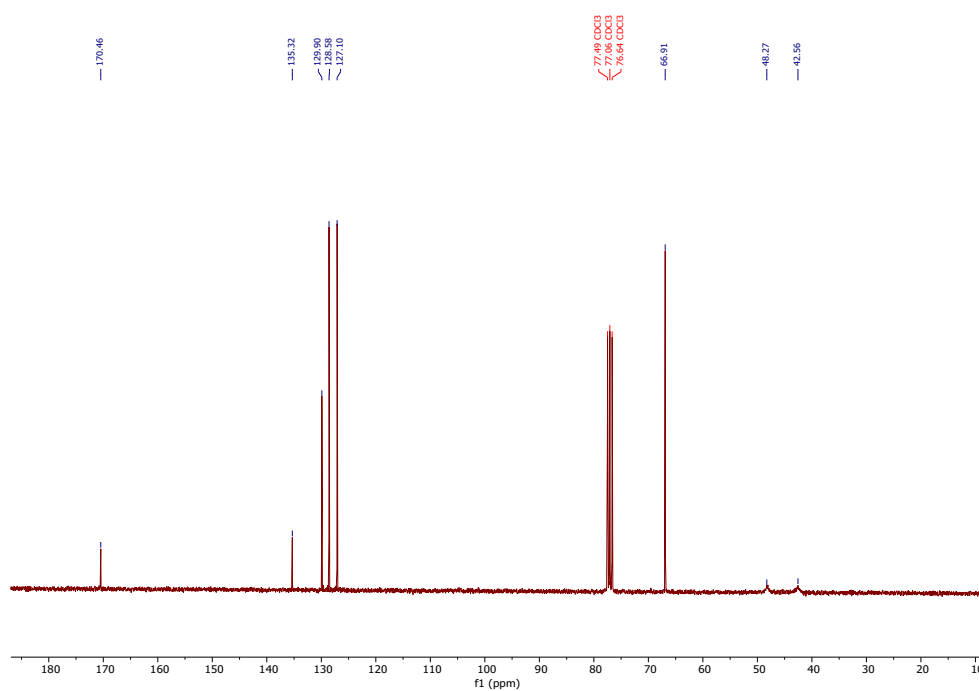

Phenyl(pyrrolidin-1-yl)methanone (**3as**)

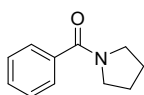

$^1\text{H}$  NMR (300 MHz, Chloroform-*d*)  $\delta$  7.58-7.48 (m, 2H), 7.40 (dd,  $J = 5.0, 1.9$  Hz, 3H), 3.54 (s, 4H), 1.92 (s, 4H).

$^{13}\text{C}$  NMR (75 MHz, Chloroform-*d*)  $\delta$  169.73, 137.24, 129.76, 128.24, 127.08, 49.54, 46.25, 26.27, 24.57.

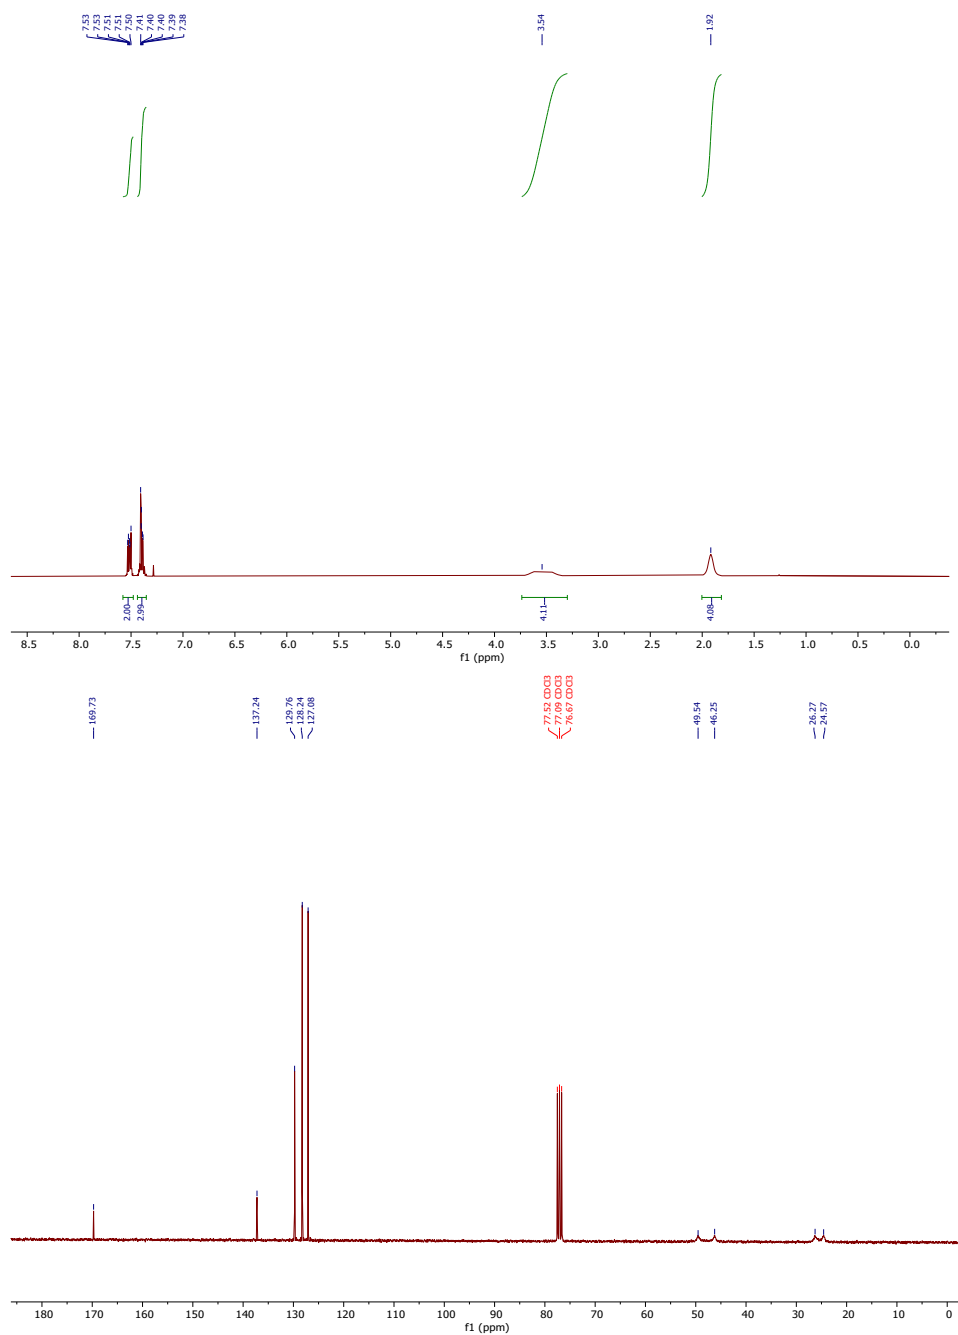

Phenyl(piperidin-1-yl)methanone (**3at**)



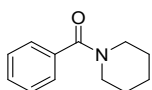

$^1\text{H}$  NMR (300 MHz, Chloroform-*d*)  $\delta$  7.31 (s, 5H), 3.45 (d,  $J = 98.4$  Hz, 4H), 1.68-1.34 (m, 6H).

$^{13}\text{C}$  NMR (75 MHz, Chloroform-*d*)  $\delta$  170.33, 136.51, 129.35, 128.40, 126.79, 48.73, 43.14, 26.37, 25.83, 24.60.

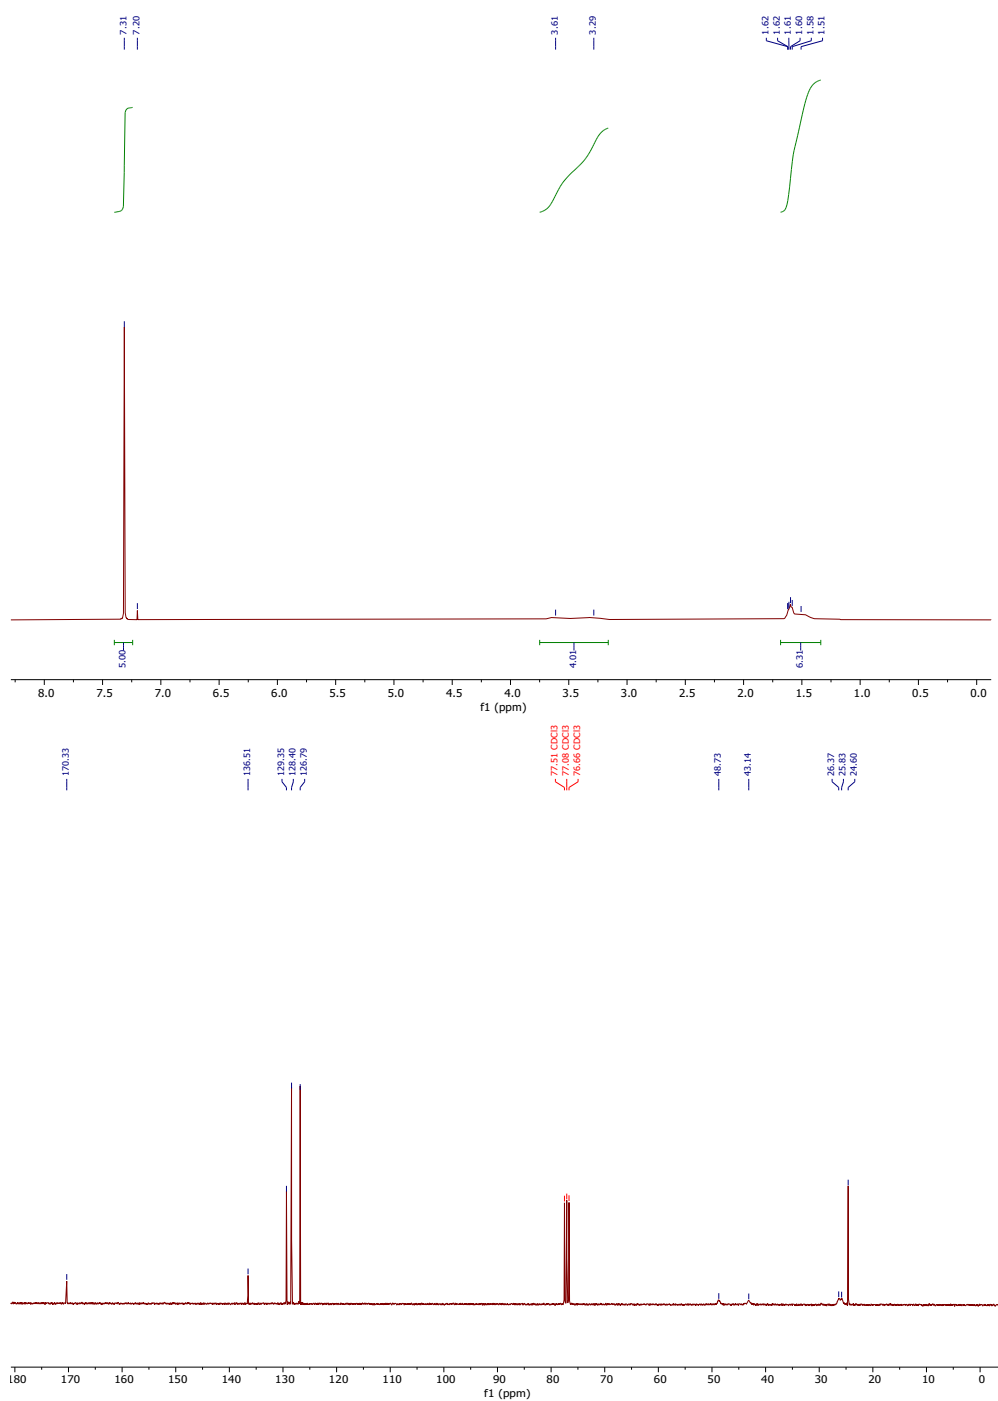

N-phenylbenzamide (**4a**)

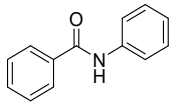

$^1\text{H}$  NMR (300 MHz, Chloroform-*d*)  $\delta$  8.04-7.94 (m, 1H), 7.92-7.84 (m, 2H), 7.72-7.62 (m, 2H), 7.60-7.45 (m, 3H), 7.43-7.35 (m, 2H), 7.22-7.13 (m, 1H).

$^{13}\text{C}$  NMR (75 MHz, Chloroform-*d*)  $\delta$  165.85, 137.97, 135.03, 131.83, 129.10, 128.78, 127.06, 124.59, 120.30.

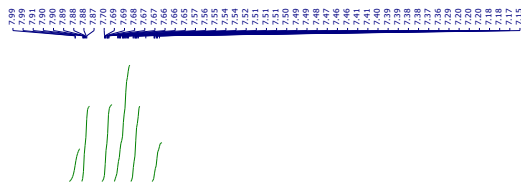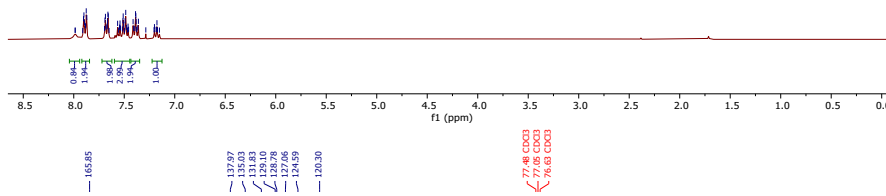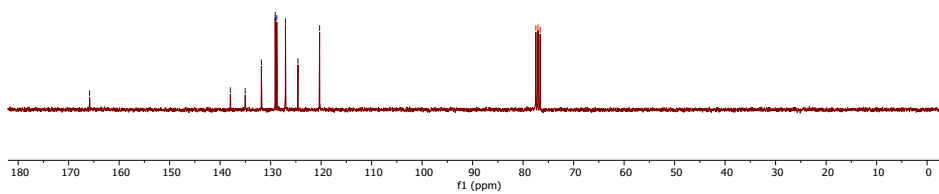

N-(naphthalen-1-yl)benzamide (**4b**)

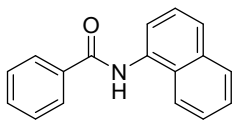

$^1\text{H}$  NMR (300 MHz, Chloroform-*d*)  $\delta$  8.17 (s, 1H), 7.90 (dd,  $J = 8.3, 1.5$  Hz, 3H), 7.85-7.78 (m, 2H), 7.66 (d,  $J = 8.2$  Hz, 1H), 7.50-7.39 (m, 6H).

$^{13}\text{C}$  NMR (75 MHz, Chloroform-*d*)  $\delta$  166.30, 134.88, 134.20, 132.41, 131.98, 128.90, 128.87, 127.50, 127.23, 126.44, 126.15, 126.08, 125.81, 121.31, 120.73.

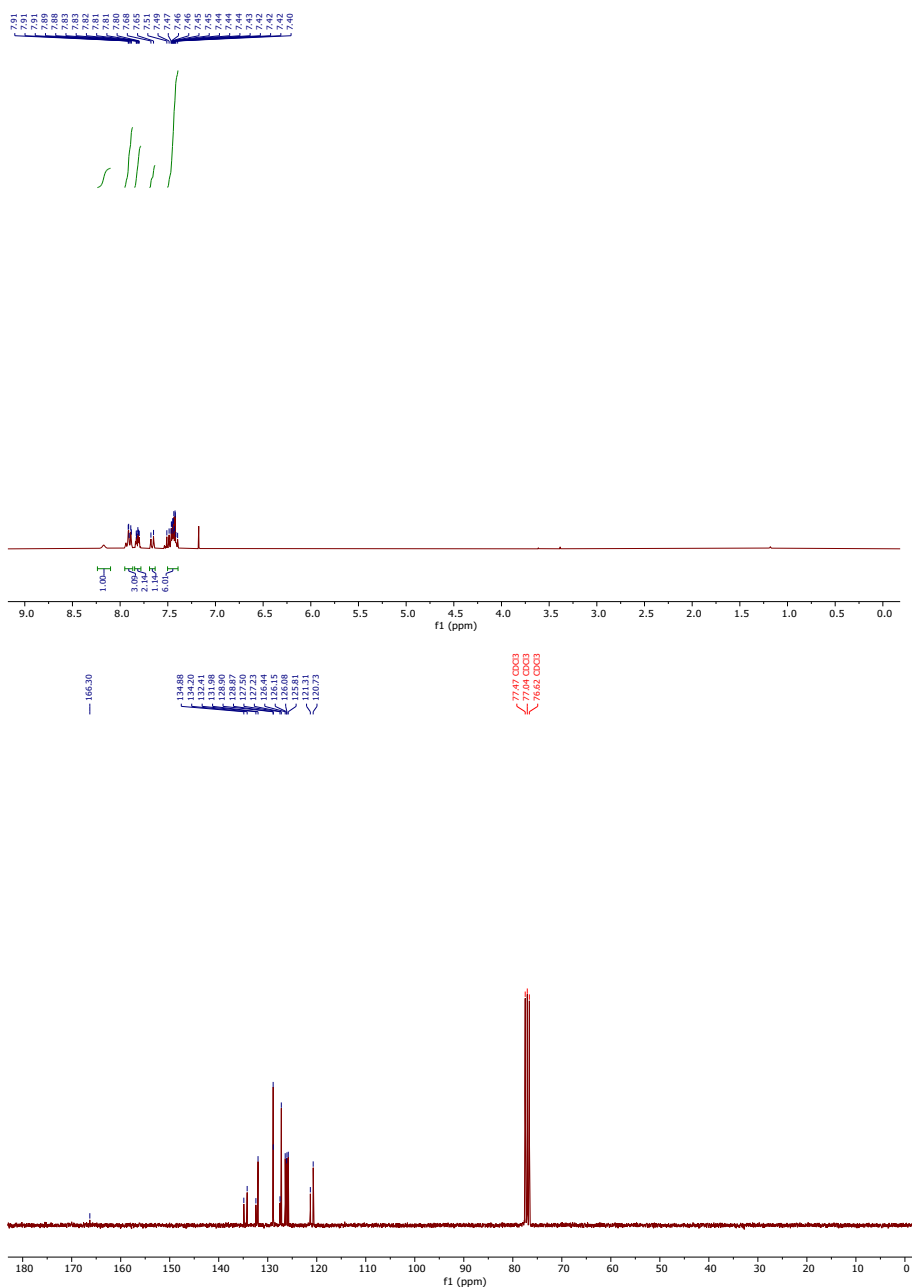

N-(4-aminophenyl)benzamide (**4c**)

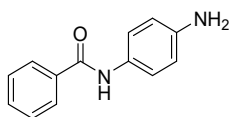

$^1\text{H}$  NMR (400 MHz,  $\text{DMSO-}d_6$ )  $\delta$  9.89 (s, 1H), 7.98-7.88 (m, 2H), 7.58-7.47 (m, 3H), 7.42-7.36 (m, 2H), 6.56 (d,  $J = 8.7$  Hz, 2H), 4.94 (s, 2H).

$^{13}\text{C}$  NMR (101 MHz,  $\text{DMSO-}d_6$ )  $\delta$  165.15, 145.69, 135.80, 131.57, 128.74, 128.58, 127.89, 122.72, 114.15.

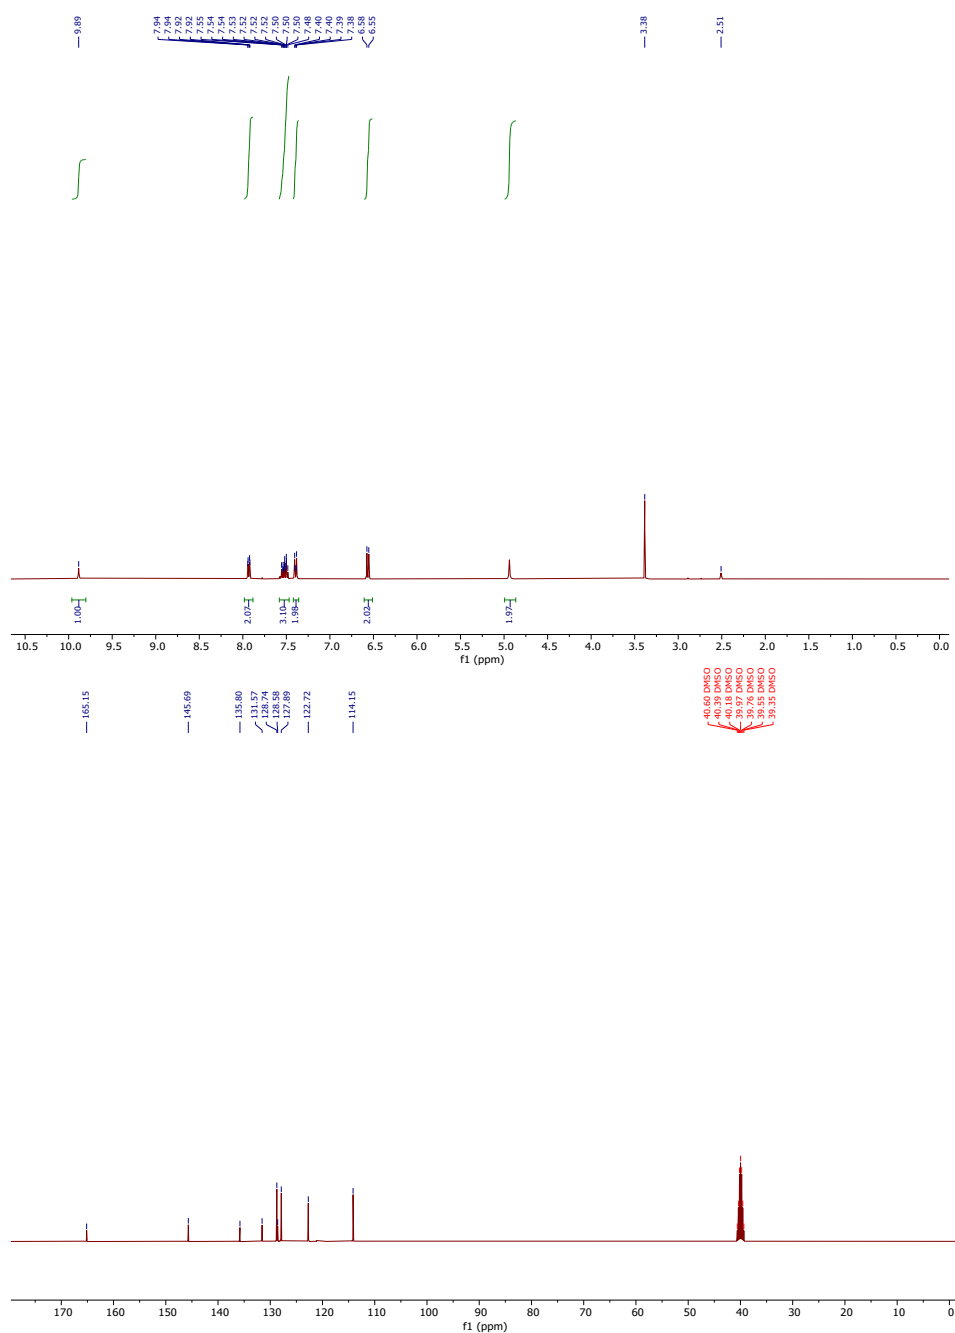

N-(3-aminophenyl)benzamide (**4d**)

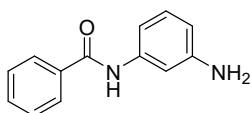

$^1\text{H}$  NMR (300 MHz, Chloroform-*d*)  $\delta$  8.12 (s, 1H), 7.89-7.76 (m, 2H), 7.57-7.38 (m, 3H), 7.26 (t,  $J = 2.1$  Hz, 1H), 7.10 (t,  $J = 8.0$  Hz, 1H), 6.88 (ddd,  $J = 8.0, 2.1, 0.9$  Hz, 1H), 6.45 (ddd,  $J = 8.0, 2.3, 1.0$  Hz, 1H), 3.61 (s, 2H).

$^{13}\text{C}$  NMR (75 MHz, Chloroform-*d*)  $\delta$  166.01, 147.34, 139.05, 135.13, 131.71, 129.75, 128.69, 127.12, 111.39, 110.31, 107.07.

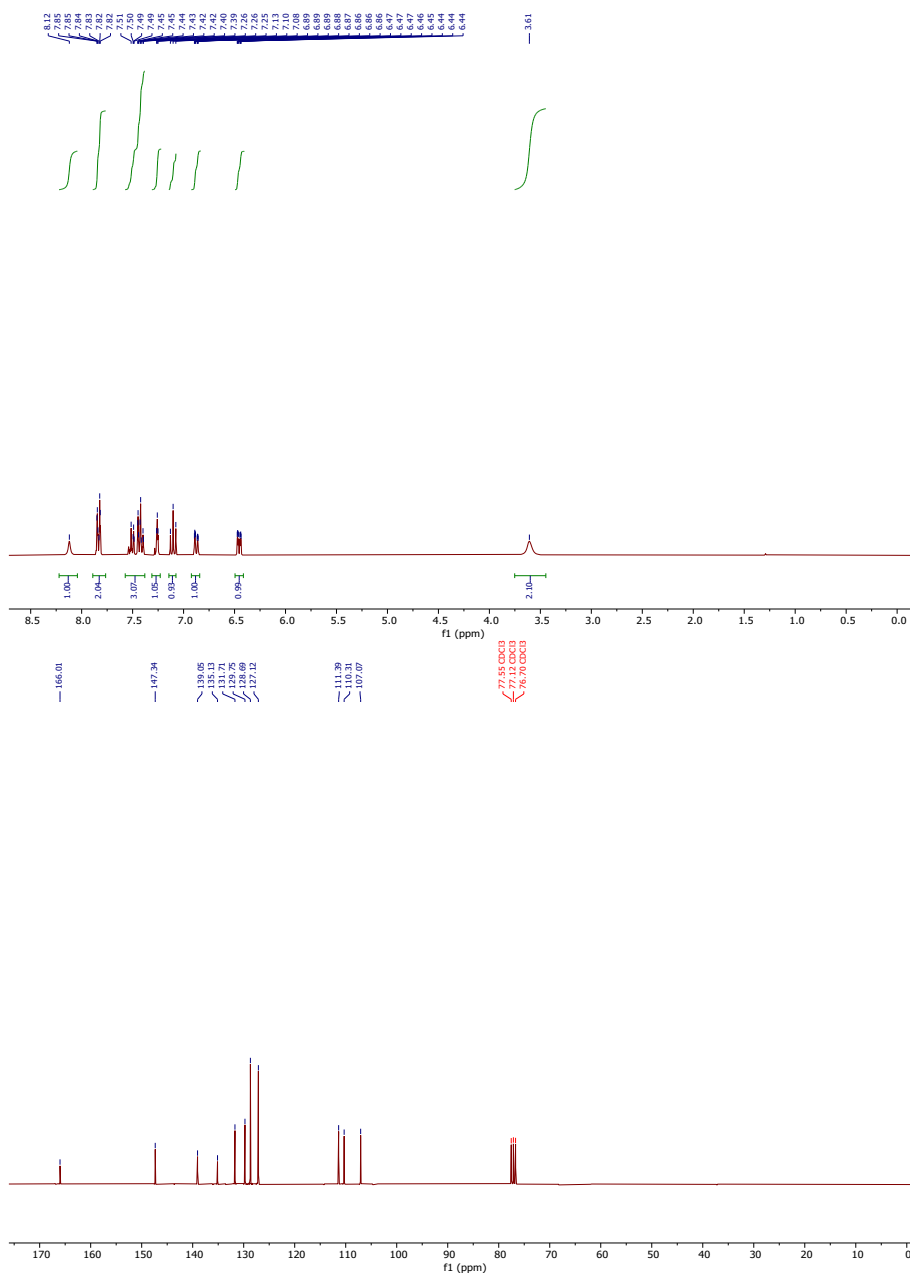

N-(o-tolyl)benzamide (**4e**)

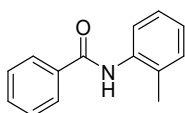

$^1\text{H}$  NMR (400 MHz, Chloroform-*d*)  $\delta$  8.01-7.88 (m, 3H), 7.79 (s, 1H), 7.60-7.42 (m, 3H), 7.31-7.23 (m, 2H), 7.15 (td,  $J = 7.5, 1.3$  Hz, 1H), 2.35 (s, 3H).

$^{13}\text{C}$  NMR (101 MHz, Chloroform-*d*)  $\delta$  165.74, 135.80, 135.01, 131.86, 130.59, 129.48, 128.84, 127.10, 126.90, 125.44, 123.29, 17.87.

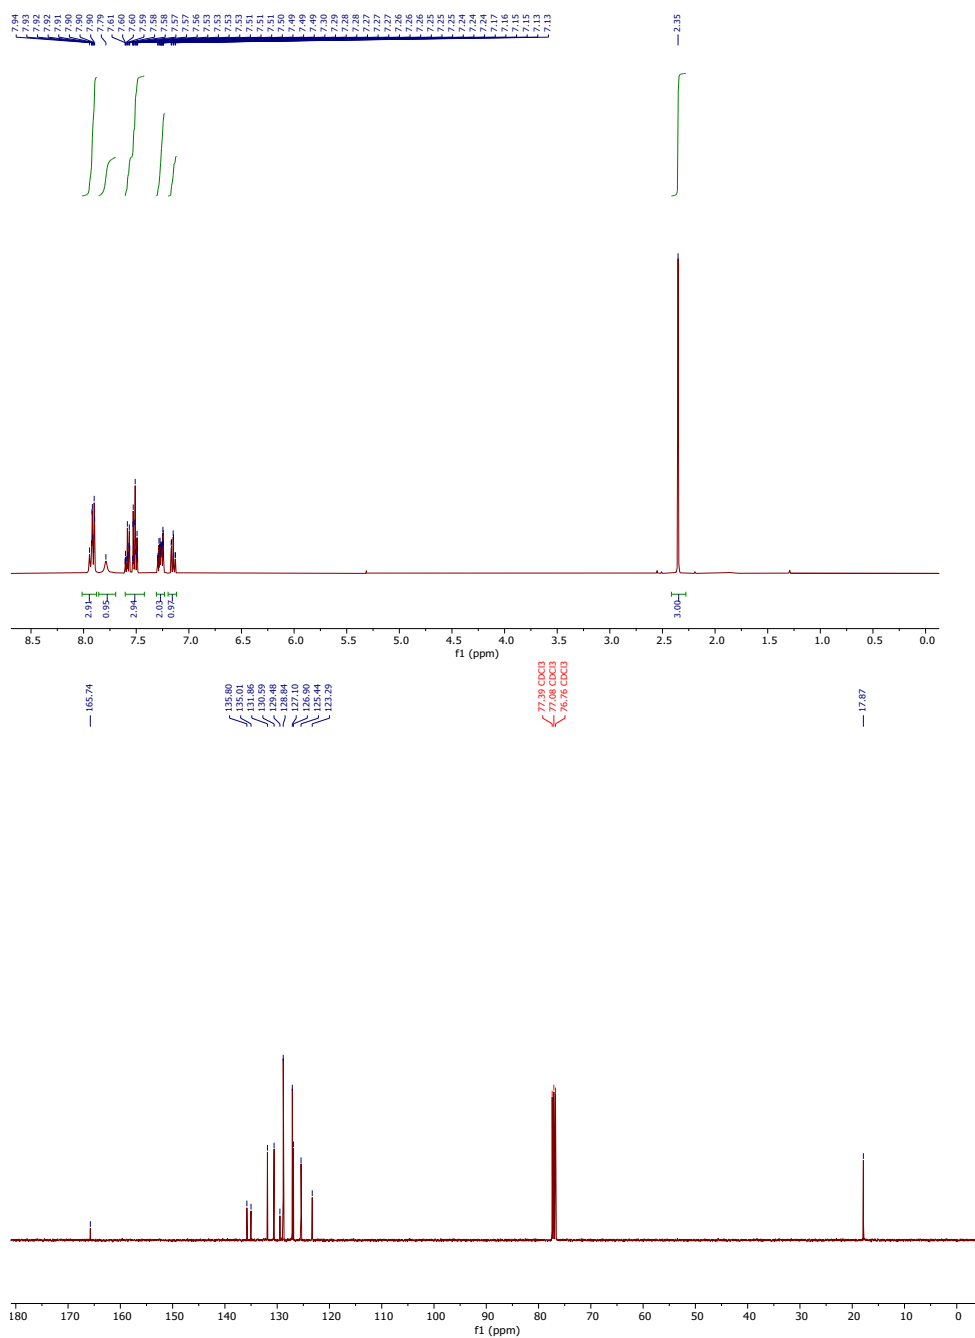

N-(m-tolyl)benzamide (**4f**)

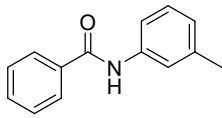

$^1\text{H}$  NMR (300 MHz, Chloroform-*d*)  $\delta$  7.78 (dd,  $J = 8.2, 1.4$  Hz, 3H), 7.50-7.35 (m, 5H), 7.09 (dd,  $J = 8.7, 0.8$  Hz, 2H), 2.26 (s, 3H).

$^{13}\text{C}$  NMR (75 MHz, Chloroform-*d*)  $\delta$  165.73, 135.38, 135.09, 134.25, 131.74, 129.59, 128.76, 127.03, 120.35, 20.93.

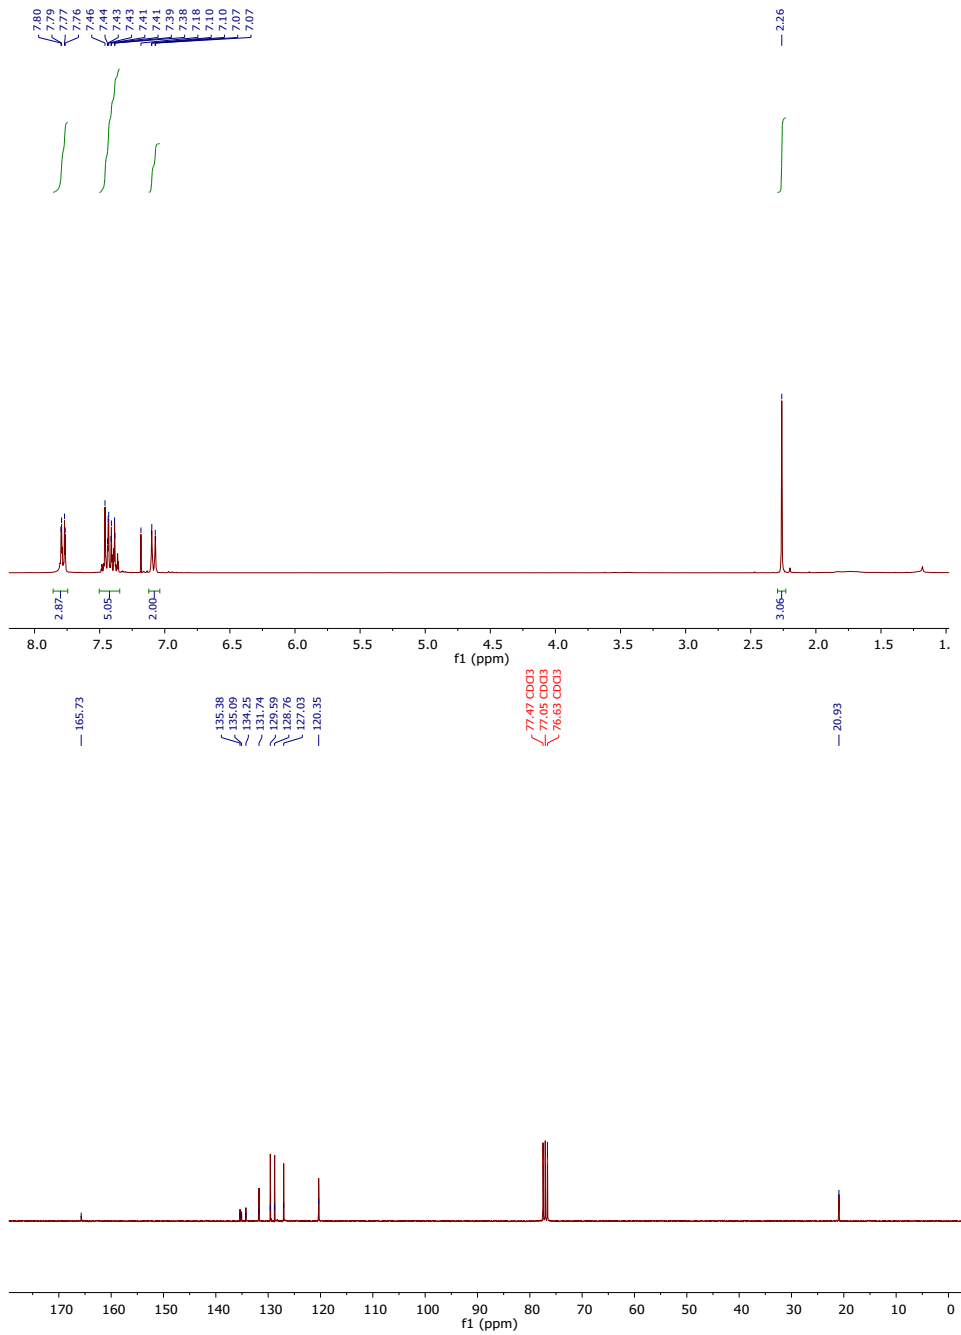

N-(p-tolyl)benzamide (**4g**)

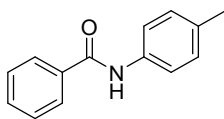

$^1\text{H}$  NMR (300 MHz, Chloroform-*d*)  $\delta$  7.87-7.74 (m, 3H), 7.51-7.32 (m, 5H), 7.21-7.13 (m, 1H), 6.89 (dt,  $J = 7.6, 0.9$  Hz, 1H), 2.28 (s, 3H).

$^{13}\text{C}$  NMR (75 MHz, Chloroform-*d*)  $\delta$  165.77, 139.04, 137.86, 131.80, 128.91, 128.78, 127.03, 125.40, 120.90, 117.32, 21.53.

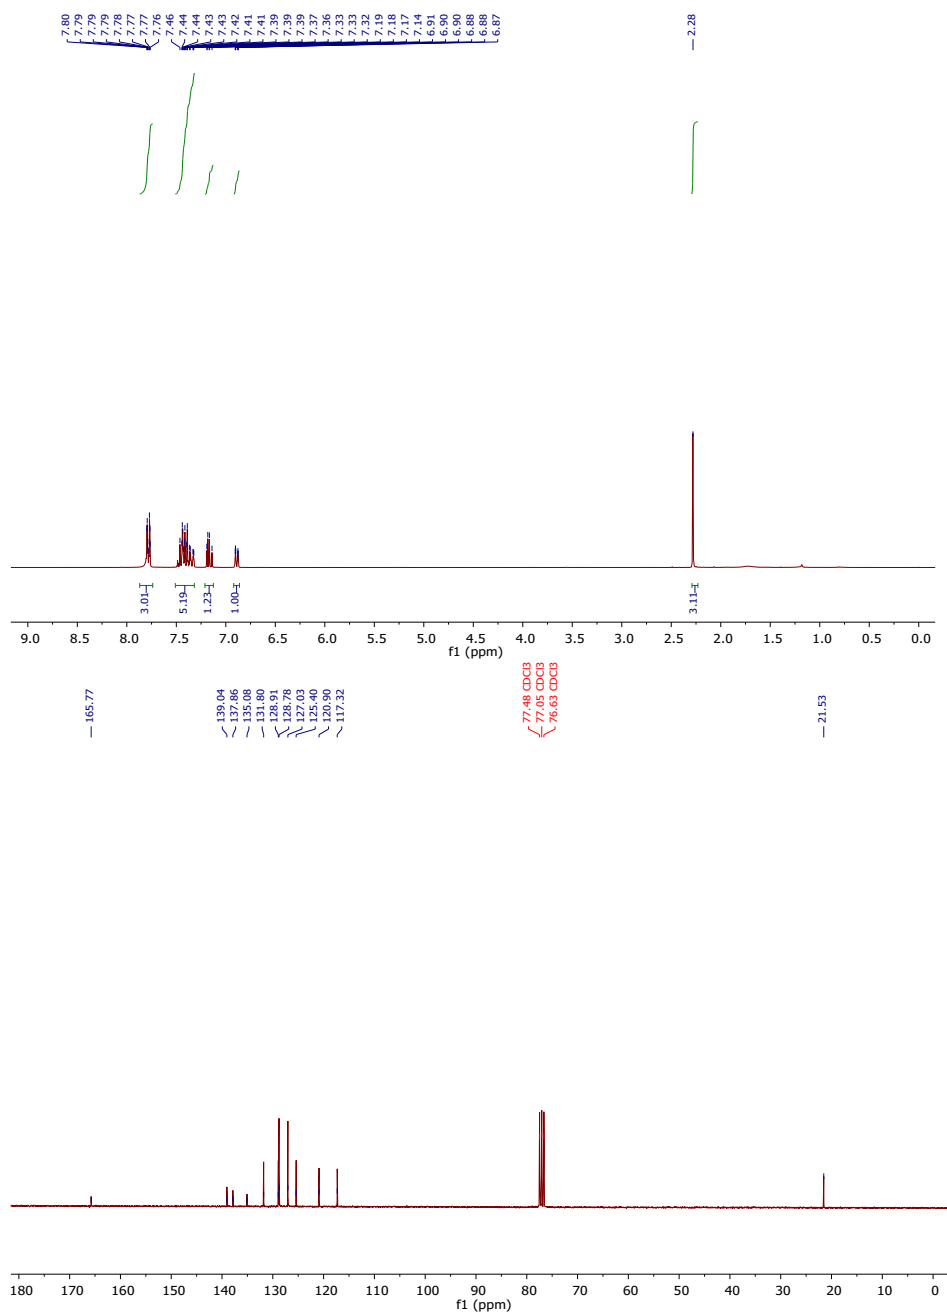

N-(4-methoxyphenyl)benzamide (**4h**)



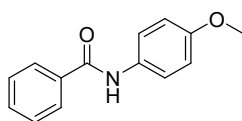

$^1\text{H}$  NMR (300 MHz, Chloroform-*d*)  $\delta$  7.91-7.86 (m, 2H), 7.60-7.45 (m, 5H), 6.97-6.88 (m, 2H), 3.84 (s, 3H).

$^{13}\text{C}$  NMR (75 MHz, Chloroform-*d*)  $\delta$  156.67, 135.06, 131.70, 131.02, 128.76, 126.99, 122.14, 114.27, 55.52.

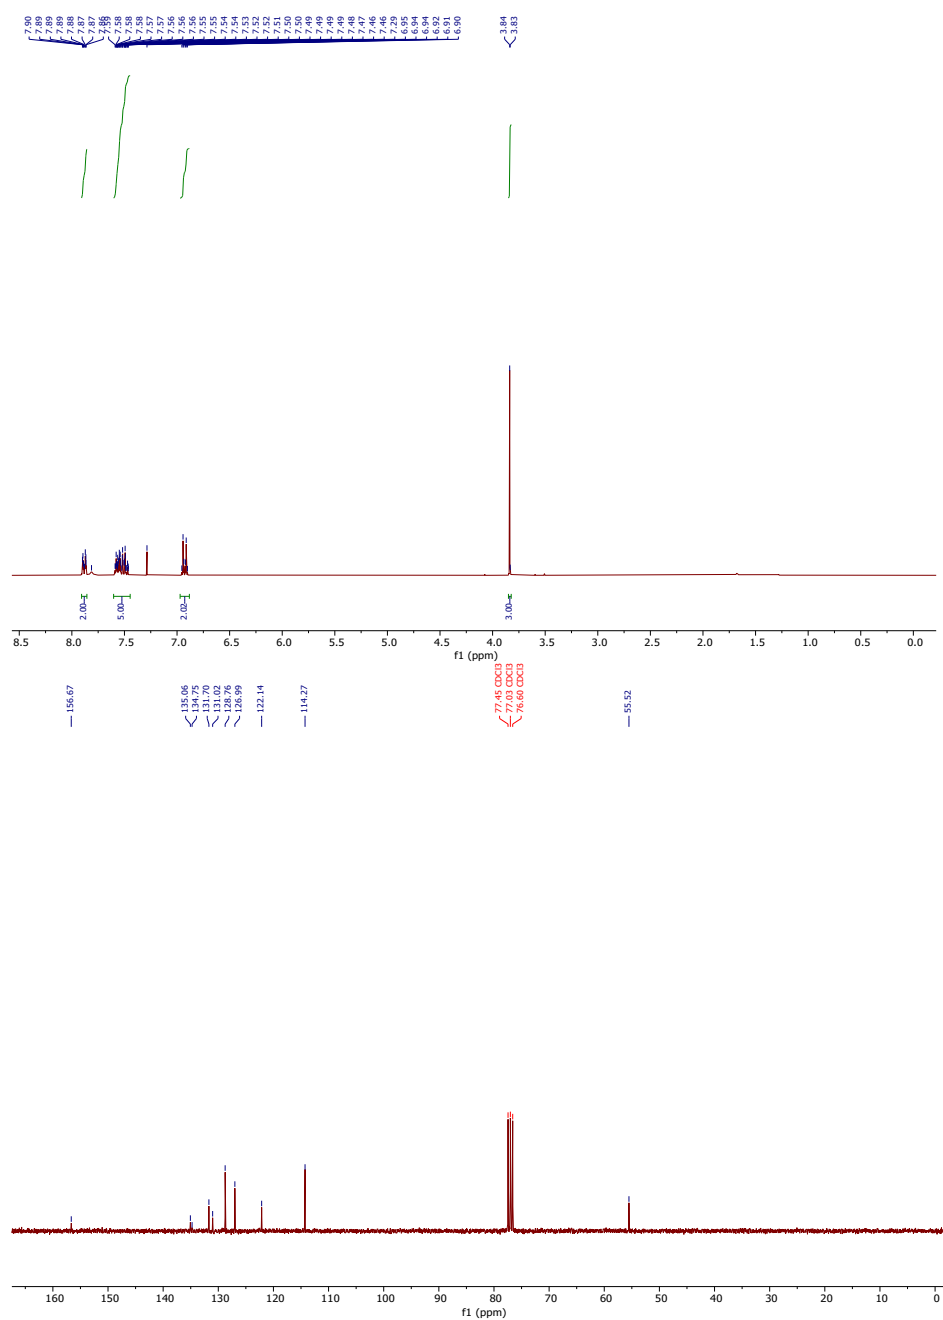

N-(3-methoxyphenyl)benzamide (**4i**)

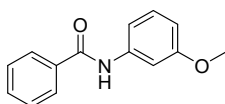

$^1\text{H}$  NMR (300 MHz, Chloroform-*d*)  $\delta$  7.86 (s, 1H), 7.79-7.75 (m, 1H), 7.52-7.34 (m, 4H), 7.20-7.13 (m, 1H), 7.05-6.95 (m, 1H), 6.63 (ddd,  $J = 8.2, 2.5, 1.0$  Hz, 1H), 6.30-6.17 (m, 1H), 3.74 (s, 3H).

$^{13}\text{C}$  NMR (75 MHz, Chloroform-*d*)  $\delta$  165.85, 160.24, 139.19, 134.98, 131.89, 129.77, 128.81, 127.03, 112.33, 110.57, 105.85, 55.35.

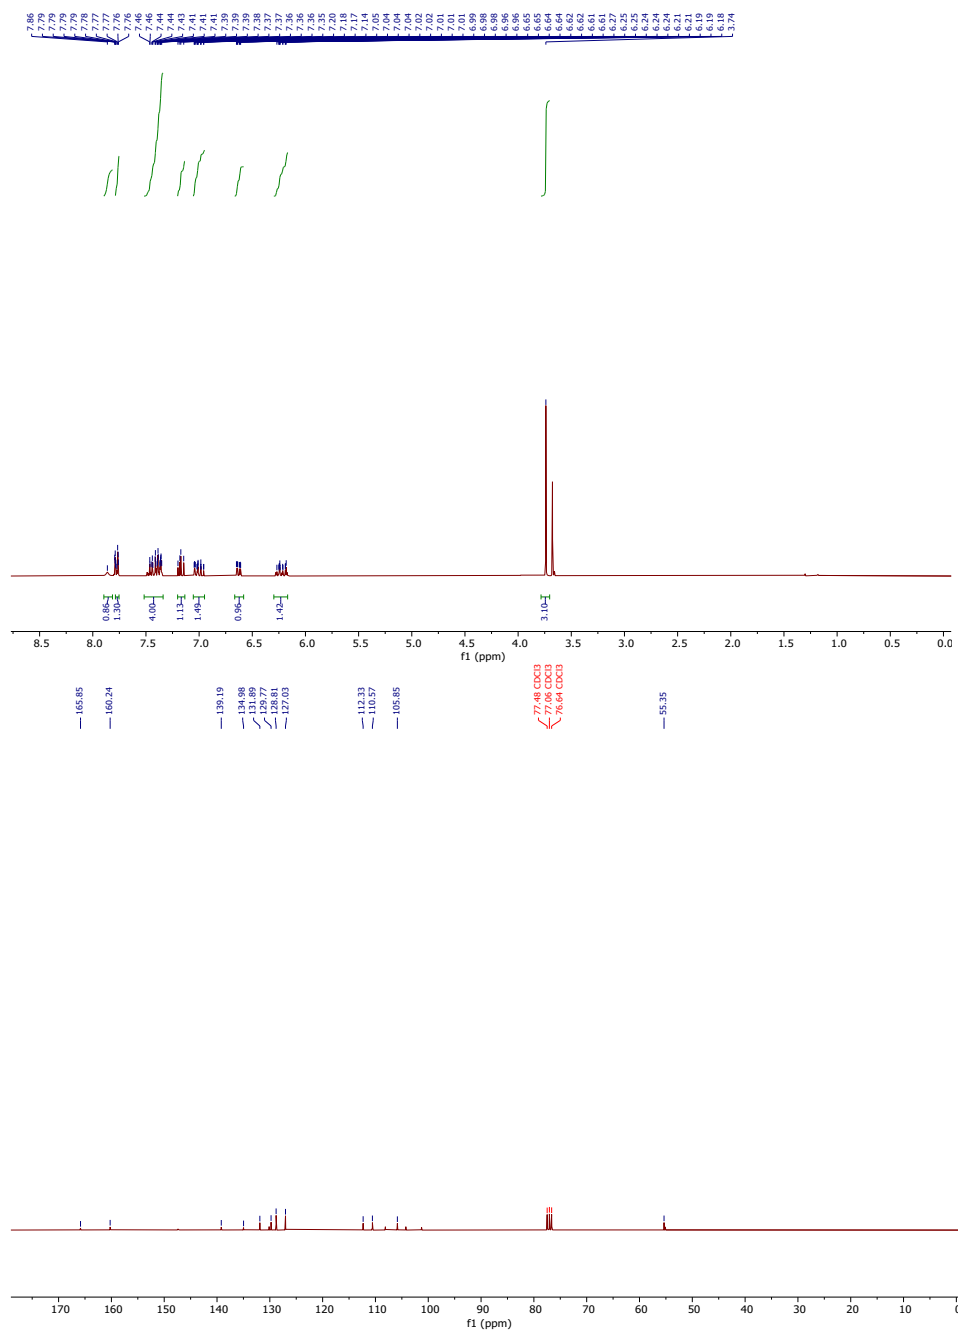

N-(4-cyanophenyl)benzamide (**4j**)

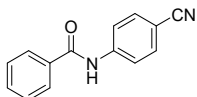

$^1\text{H}$  NMR (300 MHz, Chloroform-*d*)  $\delta$  7.90 (s, 1H), 7.84-7.79 (m, 2H), 7.74 (d,  $J = 2.0$  Hz, 1H), 7.72 (d,  $J = 2.1$  Hz, 1H), 7.63-7.57 (m, 2H), 7.53 (d,  $J = 7.3$  Hz, 1H), 7.49-7.41 (m, 2H).

$^{13}\text{C}$  NMR (75 MHz, Chloroform-*d*)  $\delta$  165.85, 142.00, 134.14, 133.39, 132.54, 129.03, 127.13, 119.92, 118.81, 107.46.

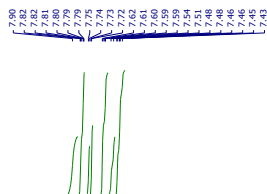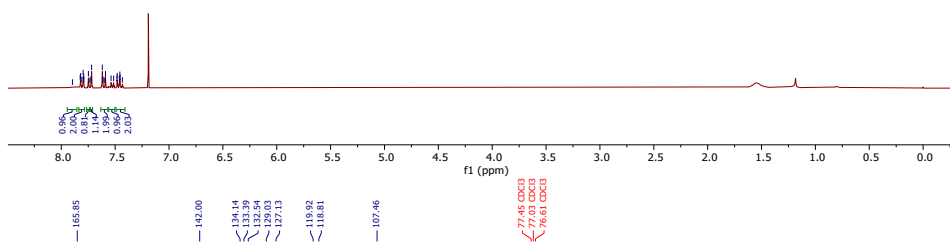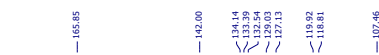

N-(3-cyanophenyl)benzamide (**4k**)

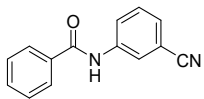

$^1\text{H}$  NMR (300 MHz, Chloroform-*d*)  $\delta$  8.00 (ddd,  $J = 2.2, 1.5, 0.6$  Hz, 1H), 7.94 (s, 1H), 7.84-7.76 (m, 3H), 7.56-7.33 (m, 5H).

$^{13}\text{C}$  NMR (75 MHz, Chloroform-*d*)  $\delta$  165.92, 138.81, 134.12, 132.44, 130.00, 128.99, 127.98, 127.10, 124.28, 123.29, 118.45, 113.17.

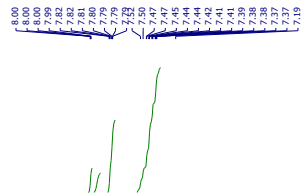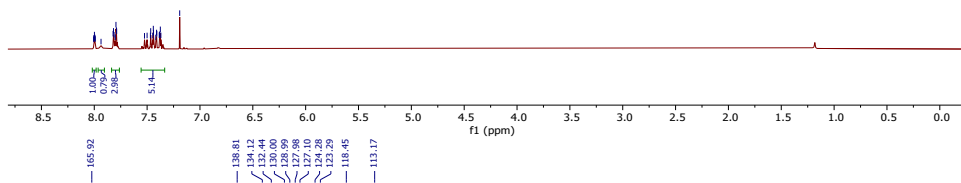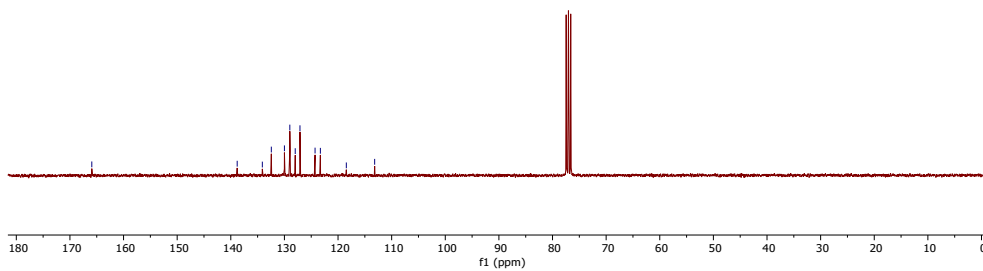

N-(pyridin-2-yl)benzamide (4I)

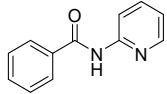

$^1\text{H}$  NMR (300 MHz, Chloroform-*d*)  $\delta$  8.83 (s, 1H), 8.35 (dt,  $J = 8.4, 1.0$  Hz, 1H), 8.19 (dt,  $J = 4.1, 1.1$  Hz, 1H), 7.92-7.84 (m, 2H), 7.71 (ddd,  $J = 8.4, 7.4, 1.9$  Hz, 1H), 7.54-7.38 (m, 3H), 7.01 (ddd,  $J = 7.4, 5.0, 1.0$  Hz, 1H).

$^{13}\text{C}$  NMR (75 MHz, Chloroform-*d*)  $\delta$  165.79, 151.54, 147.53, 138.77, 134.19, 132.32, 128.86, 127.29, 119.94, 114.34.

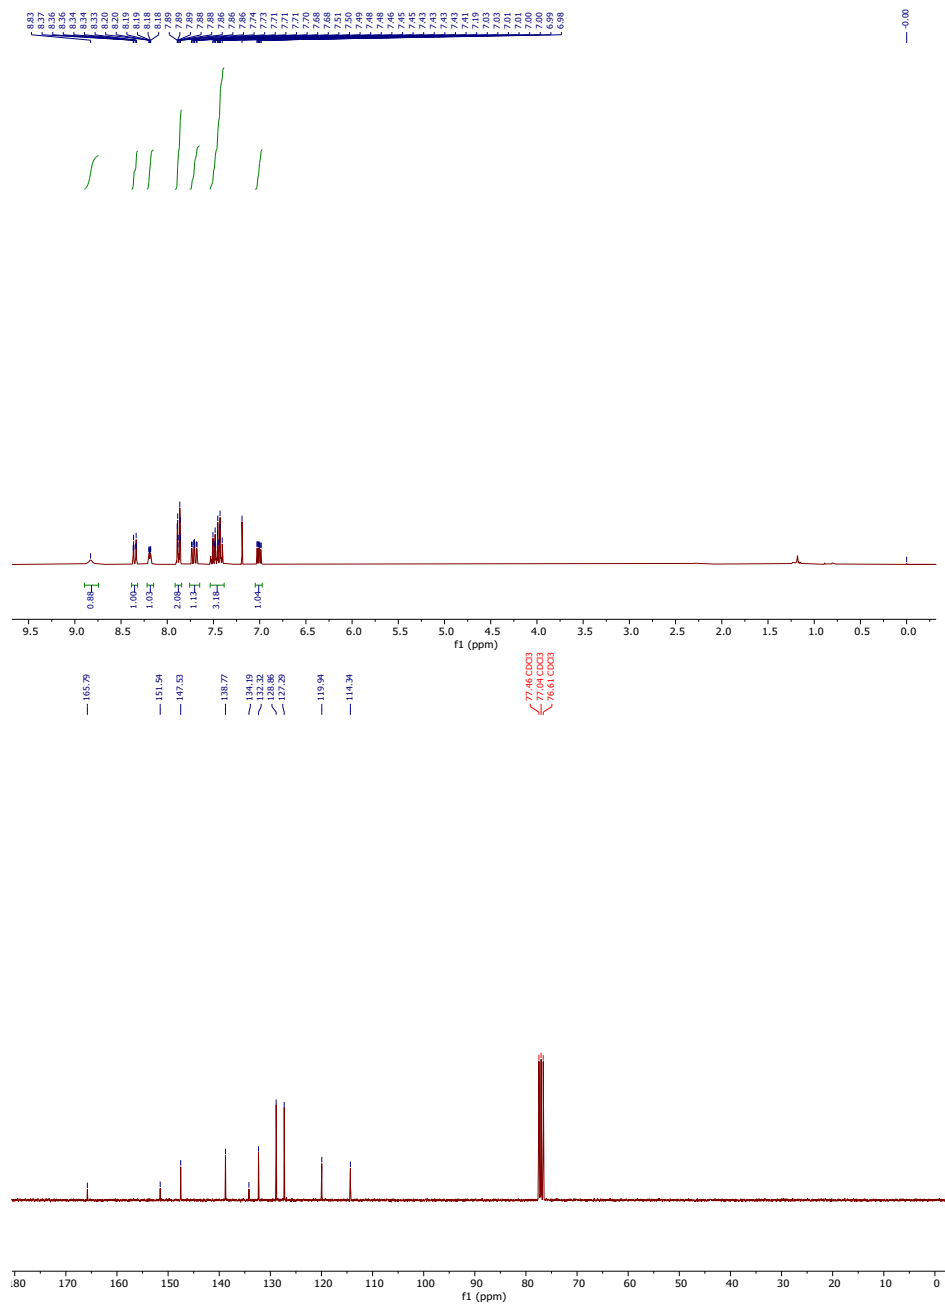

N-(1H-benzo[d]imidazol-2-yl)benzamide (**4m**)

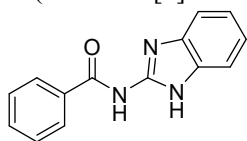

$^1\text{H}$  NMR (300 MHz, Chloroform-*d*)  $\delta$  9.69 (s, 1H), 8.13-8.00 (m, 2H), 7.56-7.44 (m, 1H), 7.39-7.31 (m, 2H), 7.07 (s, 4H).

$^{13}\text{C}$  NMR (75 MHz, Chloroform-*d*)  $\delta$  168.65, 148.17, 134.58, 133.03, 132.71, 129.35, 128.99, 128.53, 126.09, 122.83, 113.80, 105.16.

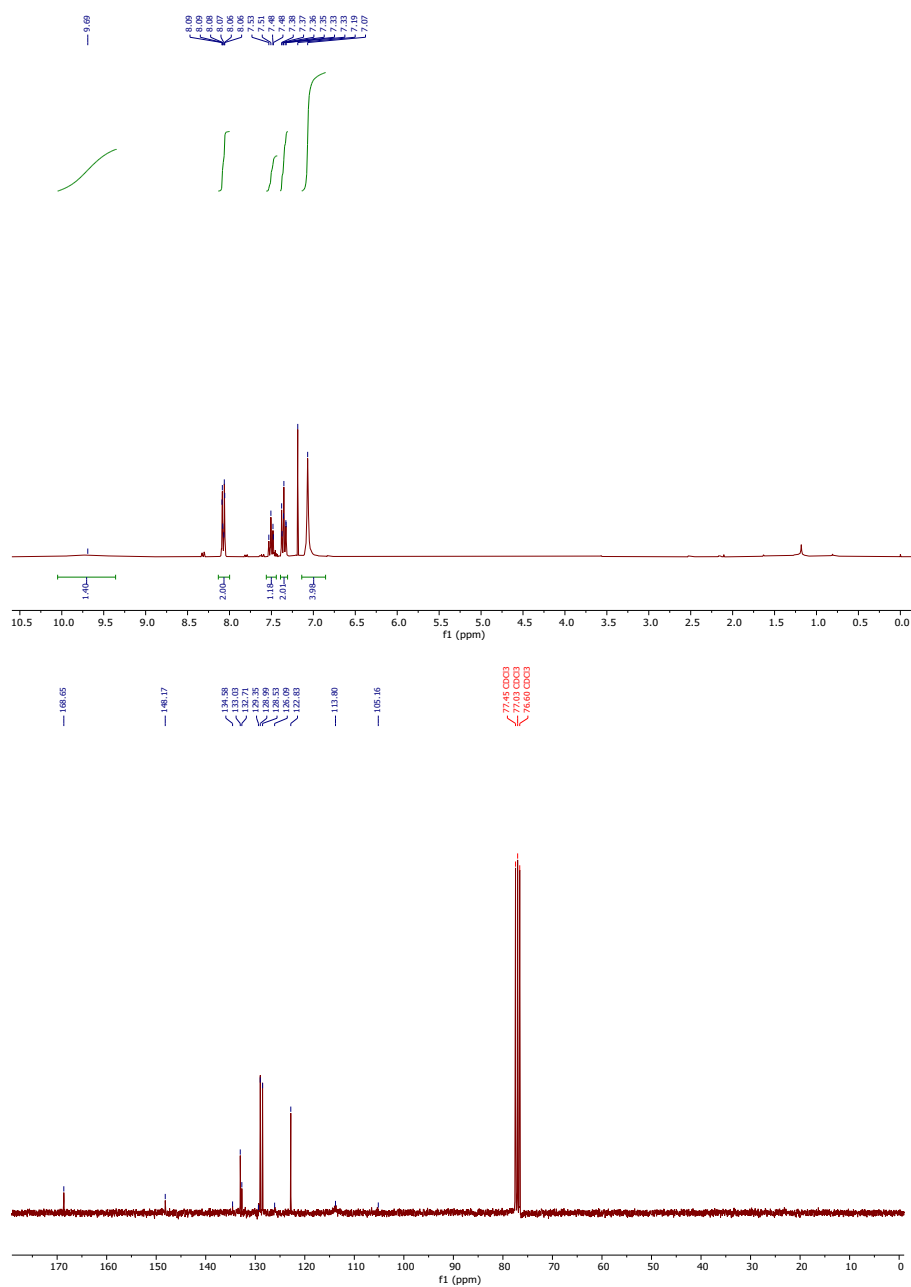

N-(benzo[d]thiazol-2-yl)benzamide (**4n**)

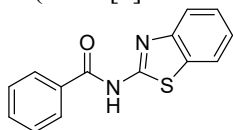

$^1\text{H}$  NMR (300 MHz, Chloroform-*d*)  $\delta$  7.96-7.90 (m, 2H), 7.80-7.73 (m, 1H), 7.52-7.44 (m, 1H), 7.38-7.29 (m, 2H), 7.23-7.14 (m, 3H).

$^{13}\text{C}$  NMR (75 MHz, Chloroform-*d*)  $\delta$  166.02, 159.88, 147.67, 133.08, 132.05, 131.87, 129.01, 127.99, 126.11, 124.02, 121.38, 120.63.

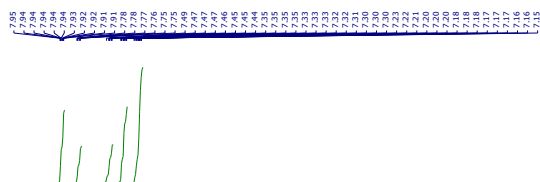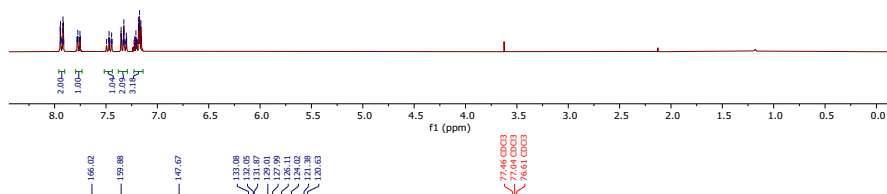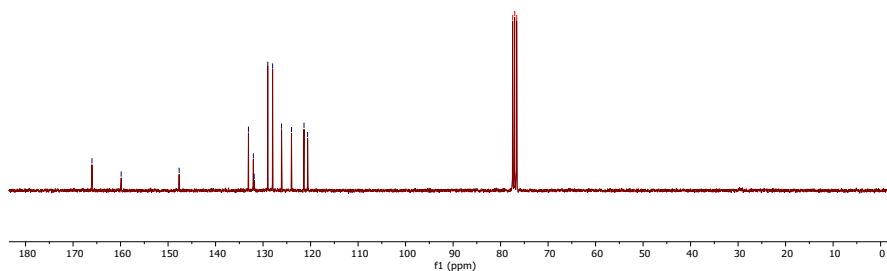

## References

- [1] X. F. Wu, H. Neumann, M. Beller, *Chem. Eur. J.*, **2010**, 16, 9750-9753.
- [2] J. Y. Wang, A. E. Strom, J. F. Hartwig, *J. Am. Chem. Soc.*, **2018**, 140, 7979-7993.
- [3] J. R. Martinelli, T. P. Clark, D. A. Watson, R. H. Munday, S. L. Buchwald, *Angew. Chem.*, **2007**, 119, 8612-8615.
- [4] P. L. L. Tremblay, A. Fabrikant, B. A. Arndtsen, *ACS Catal.*, **2018**, 8, 5350-5354.
- [5] Y. B.-David, M. Portnoy, D. Milstein, *J. Am. Chem. Soc.*, **1989**, 111, 8742-8744.
